# Supplementary material for: A phase 1b randomized study of the safety and immunological responses to vaccination with H4:IC31, H56:IC31, and BCG revaccination in Mycobacterium tuberculosis-uninfected adolescents in Cape Town, South Africa
Source: PubMed Central journal article supplement — eClinicalMedicine. 2020 Mar 18;21:100313. doi: 10.1016/j.eclinm.2020.100313 (PMC7201034; doi:10.1016/j.eclinm.2020.100313), 2020-03-18
Supplement: mmc1.pdf [file mmc1.pdf]

## Supplemental Material

### Supplemental figures

### Supplemental tables

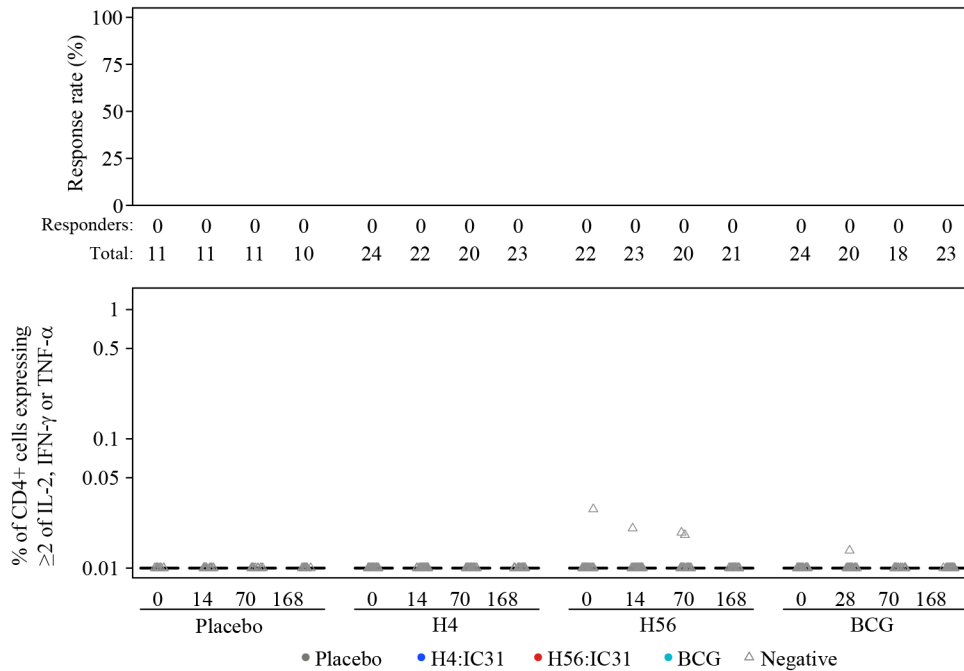

**Supplemental Figure 1. Antigen-specific CD4+ T-cell responses after re-stimulation with vaccine-matched peptide pools.** Frequency of CD4+ T cells expressing at least 2 of the cytokines IL-2, TNF- $\alpha$  and IFN- $\gamma$  in response to Rv2660c at study days 0, 14/28, 70 and 168 after vaccination (day 28 for BCG group and day 14 for all other groups). Respective response rates are indicated above each box plot. Each box plot is based upon data from responders only and is superimposed on the distributions. The mid-line of the box denotes the median and the ends of the box denote the 25th and 75th percentiles. The whiskers that extend from the top and bottom of the box extend to the most extreme data points that are no more than 1.5 times the interquartile range. Comparisons to baseline of response rates were made using McNemar's test and magnitudes among responders with the Wilcoxon Signed rank test.

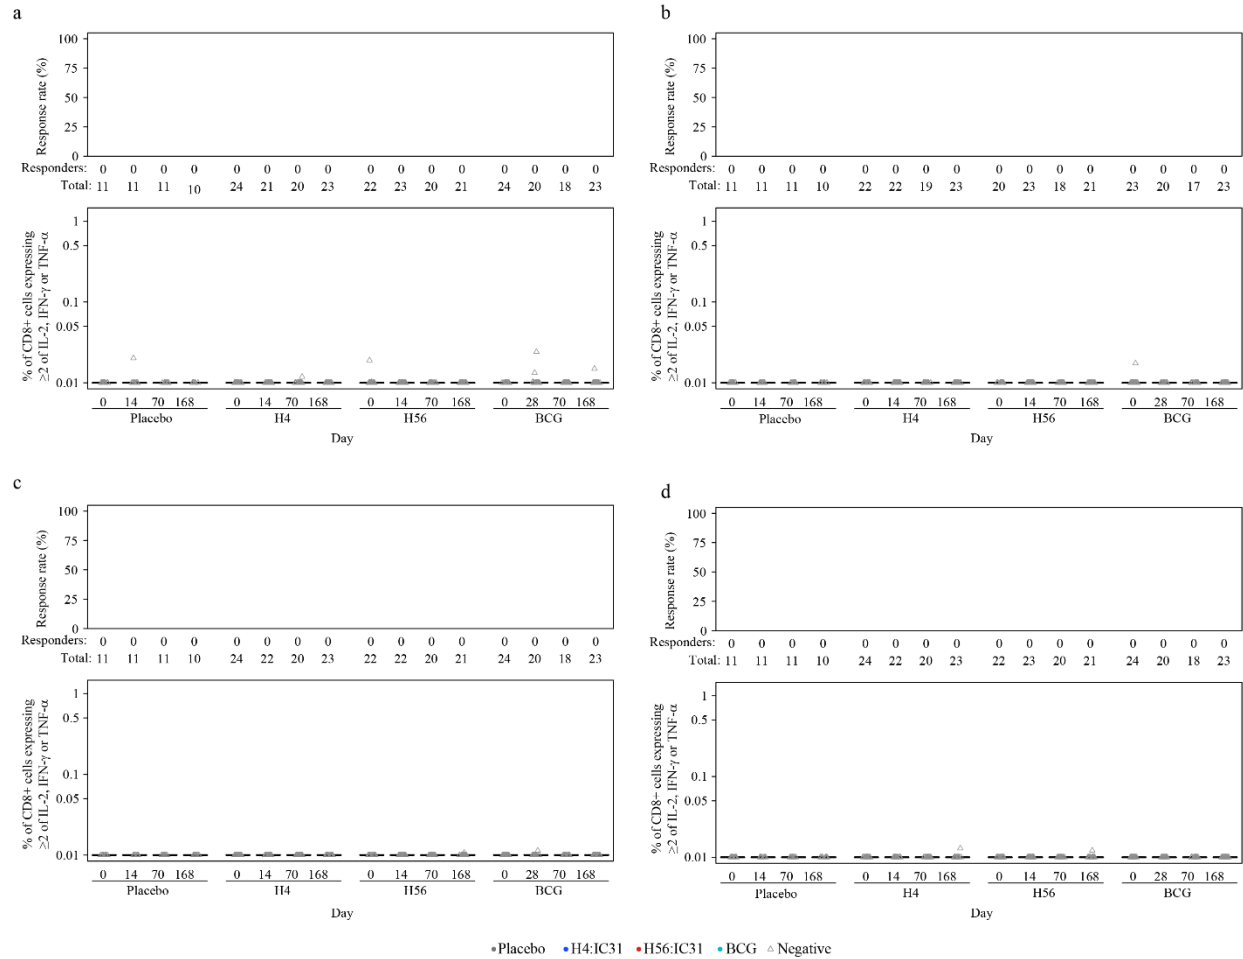

**Supplemental Figure 2. Antigen-specific CD8+ T-cell responses in the H4:IC31, H56:IC31, BCG revaccinated and placebo groups.** Frequency of CD8+ T cells expressing at least 2 of the cytokines IL-2, TNF- $\alpha$  and IFN- $\gamma$  in response to (a) Ag85B, (b) TB10.4, (c) ESAT-6 or (d) Rv2660c at study days 0, 14/28, 70 and 168 after vaccination (day 28 for BCG group and day 14 for all other groups). Respective response rates are indicated above each box plot. Each box plot is based upon data from responders only and are superimposed on the distributions. The mid-line of the box denotes the median and the ends of the box denote the 25th and 75th percentiles. The whiskers that extend from the top and bottom of the box extend to the most extreme data points that are no more than 1.5 times the interquartile range.

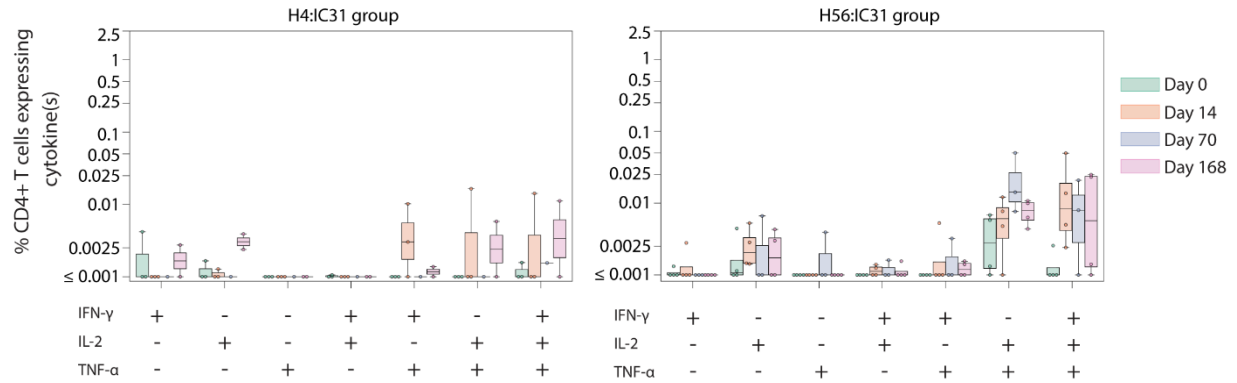

**Supplemental Figure 3. Cytokine expression of stimulated CD4+ T cells.** Boxplots show the median and interquartile (IQR) of the percentage of CD4+ T cells expressing the combination of cytokines indicated on the x-axis. The magnitude is background-subtracted. Panels show Ag85B-specific responses among H4:IC31 and H56:IC31 recipients. These data are only from the H4:IC31 (n=3) and H56:IC31 (n=5) group participants that received only the first of the two injections specified by the protocol.

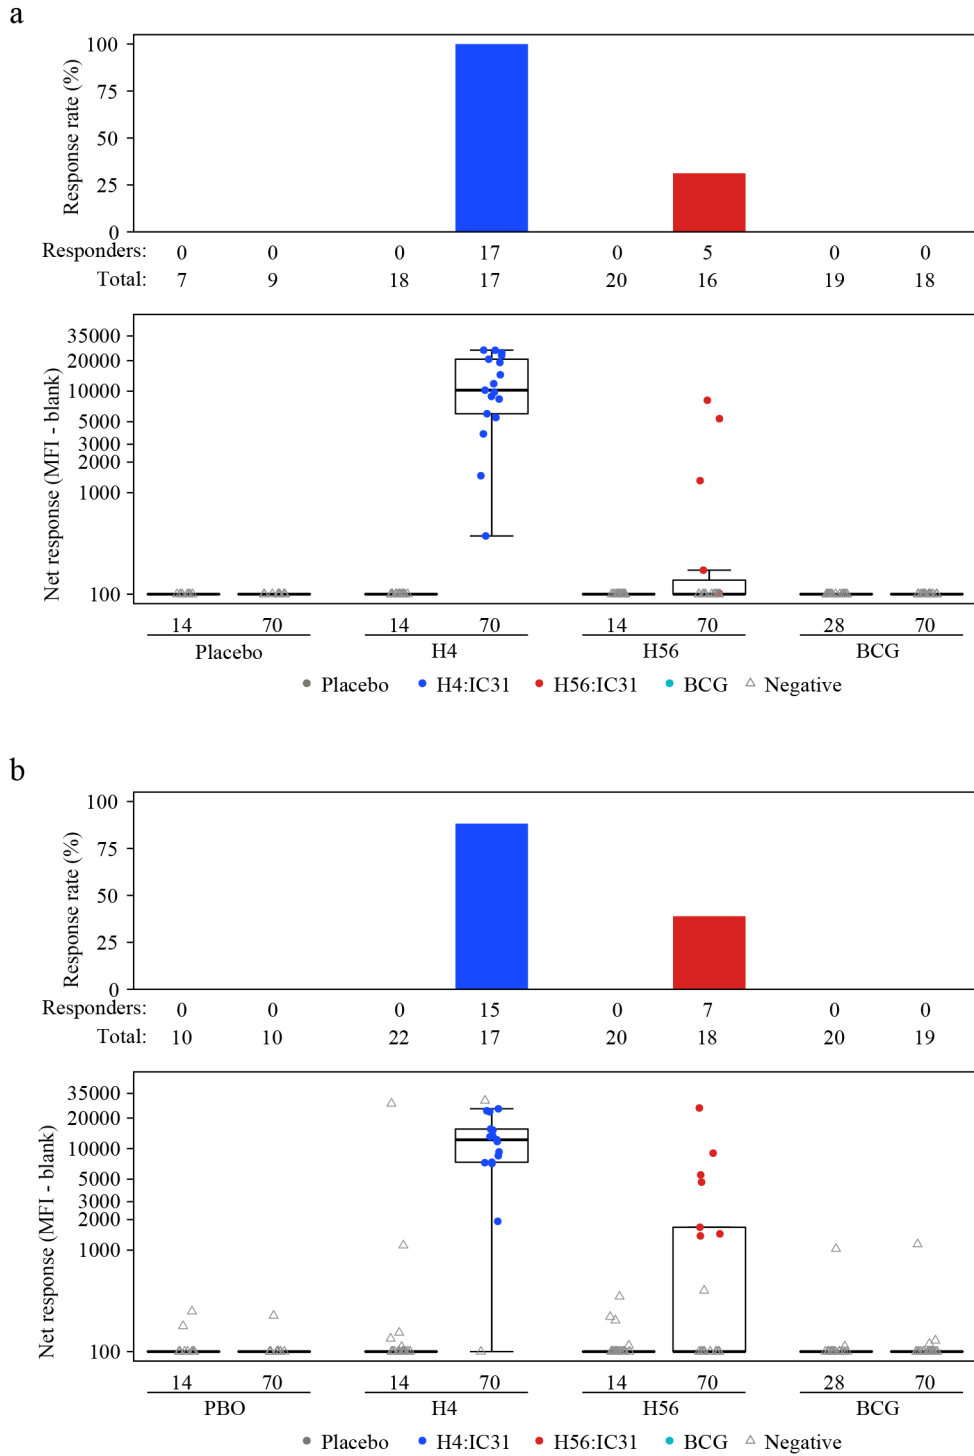

**Supplemental Figure 4. H4- and H56-specific IgG1 binding antibody.** Levels of binding antibody were measured using a binding antibody multiplex assay. Boxplots show the median and IQR of the net response on a log scale. Panels show response rates and net response magnitude to the H4 recombinant fusion protein (a) and the H56 recombinant fusion protein (b).

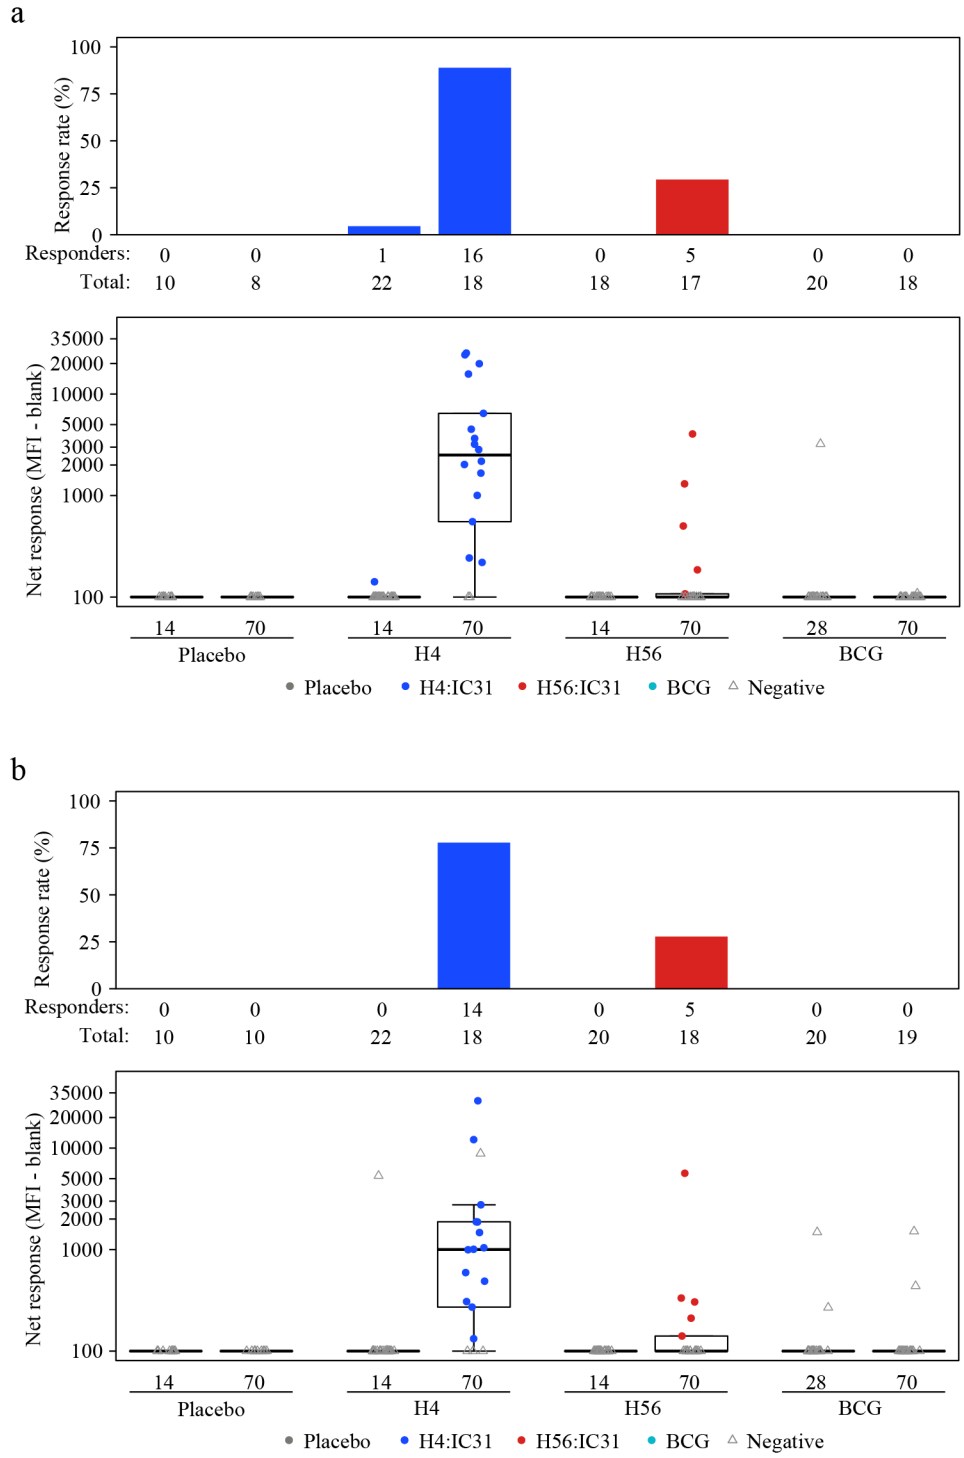

**Supplemental Figure 5. H4- and H56-specific IgG3 binding antibody.** Levels of binding antibody were measured using a binding antibody multiplex assay. Boxplots show the median and IQR of the net response on a log scale. Panels show response rates and net response magnitude to the H4 recombinant fusion protein (a) and the H56 recombinant fusion protein (b).

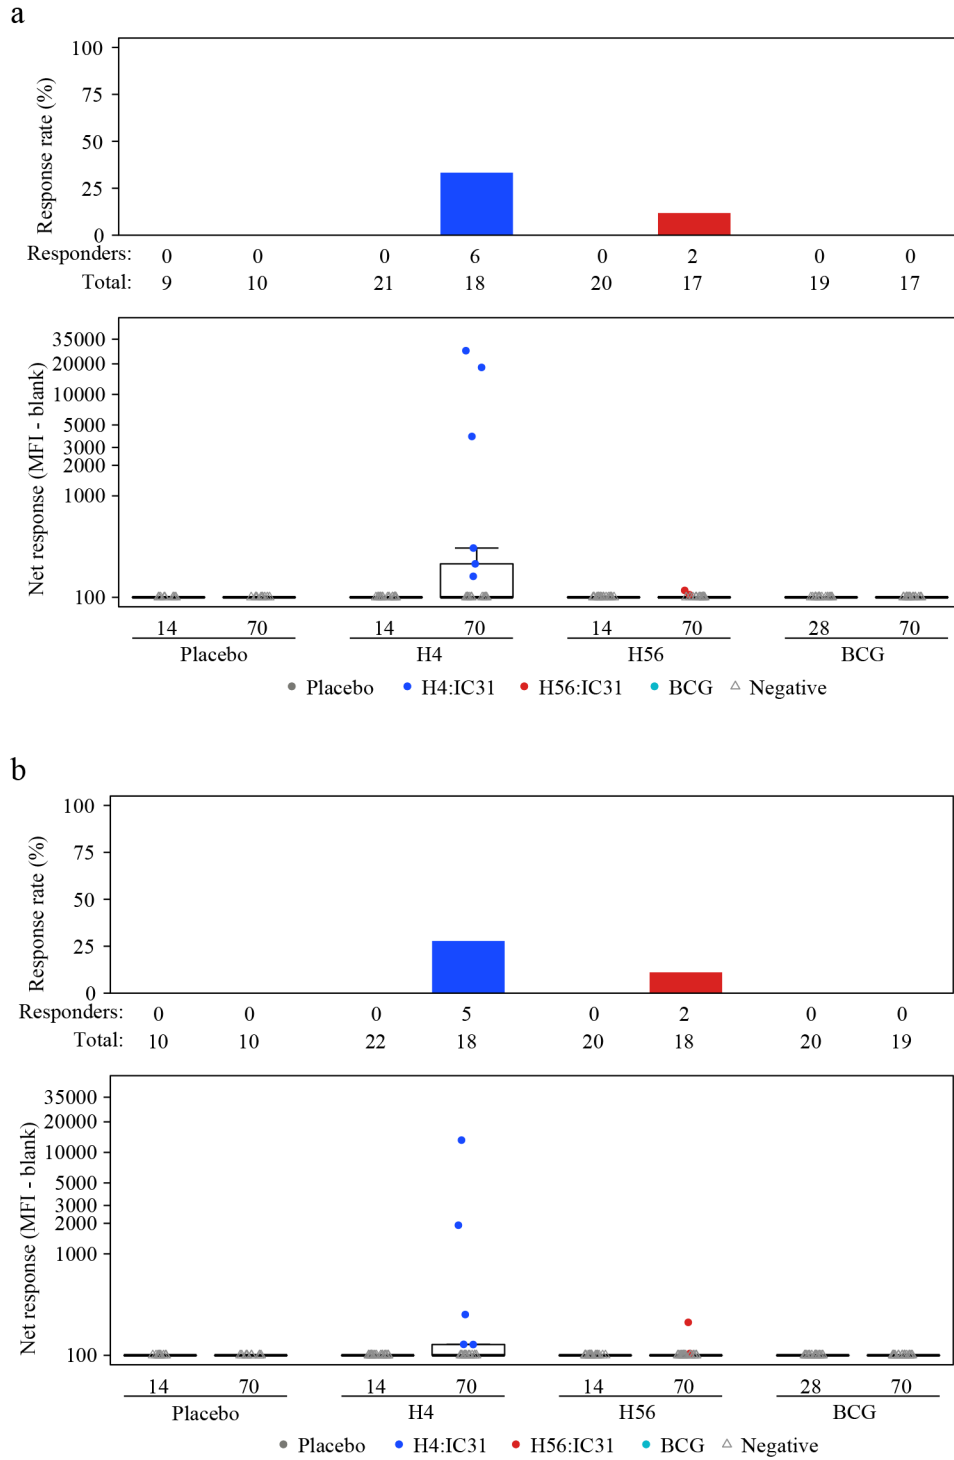

**Supplemental Figure 6. H4- and H56-specific IgG4 binding antibody.** Levels of binding antibody were measured using a binding antibody multiplex assay. Boxplots show the median and IQR of the net response on a log scale. Panels show response rates and net response magnitude to the H4 recombinant fusion protein (a) and the H56 recombinant fusion protein (b).

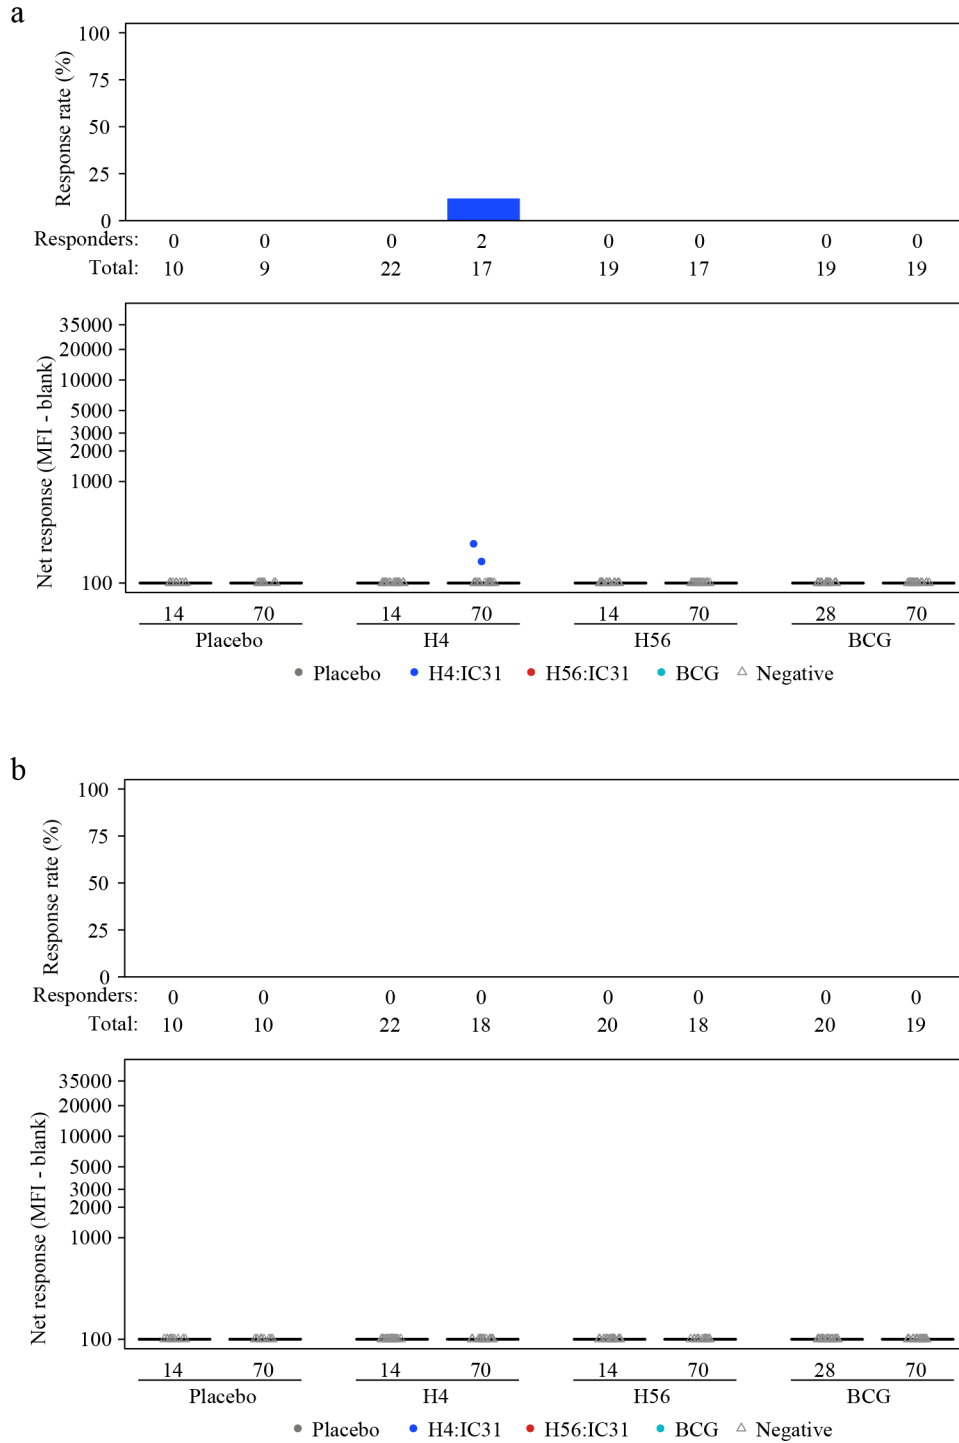

**Supplemental Figure 7. H4- and H56-specific IgG2 binding antibody.** Levels of binding antibody were measured using a binding antibody multiplex assay. Boxplots show the median and IQR of the net response on a log scale. Panels show response rates and net response magnitude to the H4 recombinant fusion protein (a) and the H56 recombinant fusion protein (b).

**Supplemental Table 1. Overall incidence of related adverse events (solicited and unsolicited) by severity and dose at onset.**

| Variable                               | Placebo (N=12) | BCG (N=24) | H4:IC31 (N=24) | H56:IC31 (N=24) |
|----------------------------------------|----------------|------------|----------------|-----------------|
| <b>Participants with at least 1 AE</b> |                |            |                |                 |
| <b>After any vaccination</b>           |                |            |                |                 |
| N1 <sup>a</sup>                        | 12             | 24         | 24             | 24              |
| Mild, n (%) <sup>b</sup>               | 4 (33·3)       | 15 (62·5)  | 14 (58·3)      | 7 (29·2)        |
| Moderate, n (%) <sup>b</sup>           | 2 (16·7)       | 8 (33·3)   | 3 (12·5)       | 8 (33·3)        |
| Severe, n (%) <sup>b</sup>             | 0              | 0          | 0              | 0               |
| <b>After study day 0 vaccination</b>   |                |            |                |                 |
| N1 <sup>a</sup>                        | 12             | 24         | 24             | 24              |
| Mild, n (%) <sup>b</sup>               | 5 (41·7)       | 15 (62·5)  | 13 (54·2)      | 8 (33·3)        |
| Moderate, n (%) <sup>b</sup>           | 1 (8·3)        | 8 (33·3)   | 2 (8·3)        | 7 (29·2)        |
| Severe, n (%) <sup>b</sup>             | 0              | 0          | 0              | 0               |
| <b>After study day 56 vaccination</b>  |                |            |                |                 |
| N1 <sup>a</sup>                        | 11             | NA         | 21             | 19              |
| Mild, n (%) <sup>b</sup>               | 2 (18·2)       | NA         | 7 (33·3)       | 6 (31·6)        |
| Moderate, n (%) <sup>b</sup>           | 1 (9·1)        | NA         | 1 (4·8)        | 1 (5·3)         |
| Severe, n (%) <sup>b</sup>             | 0              | NA         | 0              | 0               |

NA=not applicable

a. N1=Total number of participants within each treatment group in the Safety Analysis Set who received the applicable study vaccination.

b. Percentages based on N1.

**Supplemental ICS Tables. Descriptive tables of the ICS data and longitudinal comparisons.**

See following file.



**HVTN 602 / AERAS A-042: A randomized, placebo-controlled, partially blinded phase 1b clinical trial to evaluate the safety and immunogenicity of BCG revaccination, H4:IC31, and H56:IC31 in healthy, HIV-1-uninfected adolescent participants**

**Lab PT Report**

**Data as of February 5, 2018**

**Table 1**

**ICS Response Rates Using MIMOSA**

| Lab | Tcell | Peptide Pool | Cytokine             | Day | Group        | Response Rate   | 95% CI          |    |               |                 |                 |
|-----|-------|--------------|----------------------|-----|--------------|-----------------|-----------------|----|---------------|-----------------|-----------------|
| CH  | CD4+  | BCG-Pasteur  | 2_of_3_IFNg_IL2_TNFa | 0   | Placebo      | 4/11 = 36.4%    | ( 15.2%, 64.6%) |    |               |                 |                 |
|     |       |              |                      |     | H4:IC31      | 5/23 = 21.7%    | ( 9.7%, 41.9%)  |    |               |                 |                 |
|     |       |              |                      |     | H56:IC31     | 7/22 = 31.8%    | ( 16.4%, 52.7%) |    |               |                 |                 |
|     |       |              |                      |     |              |                 |                 | 14 | BCG           | 6/24 = 25.0%    | ( 12.0%, 44.9%) |
|     |       |              |                      |     |              |                 | Placebo         |    | 2/10 = 20.0%  | ( 5.7%, 51.0%)  |                 |
|     |       |              |                      |     |              |                 | H4:IC31         |    | 1/22 = 4.5%   | ( 0.8%, 21.8%)  |                 |
|     |       |              |                      |     |              |                 |                 | 28 | H56:IC31      | 6/22 = 27.3%    | ( 13.2%, 48.2%) |
|     |       |              |                      |     |              |                 | BCG             |    | 10/20 = 50.0% | ( 29.9%, 70.1%) |                 |
|     |       |              |                      |     |              |                 | Placebo         |    | 2/11 = 18.2%  | ( 5.1%, 47.7%)  |                 |
|     |       |              |                      |     |              |                 |                 | 70 | H4:IC31       | 4/20 = 20.0%    | ( 8.1%, 41.6%)  |
|     |       |              |                      |     |              |                 | H56:IC31        |    | 10/20 = 50.0% | ( 29.9%, 70.1%) |                 |
|     |       |              |                      |     |              |                 | BCG             |    | 10/18 = 55.6% | ( 33.7%, 75.4%) |                 |
|     |       |              |                      | 168 | Placebo      | 4/10 = 40.0%    | ( 16.8%, 68.7%) |    |               |                 |                 |
|     |       |              | H4:IC31              |     | 0/20 = 0.0%  | ( 0.0%, 16.1%)  |                 |    |               |                 |                 |
|     |       |              | H56:IC31             |     | 7/20 = 35.0% | ( 18.1%, 56.7%) |                 |    |               |                 |                 |
|     |       |              | BCG                  |     | 6/18 = 33.3% | ( 16.3%, 56.3%) |                 |    |               |                 |                 |

**Unreliable samples are excluded.**

**Records are excluded if the number of T-cell subsets is < 1,000**

**These criteria are applied separately to CD4+ and CD8+ subsets.**

**95% confidence intervals are constructed using Wilson's score method.**

**HVTN 602 / AERAS A-042: A randomized, placebo-controlled, partially blinded phase 1b clinical trial to evaluate the safety and immunogenicity of BCG revaccination, H4:IC31, and H56:IC31 in healthy, HIV-1-uninfected adolescent participants**

**Lab PT Report**

**Data as of February 5, 2018**

**Table 1**

**ICS Response Rates Using MIMOSA**

| Lab | Tcell | Peptide Pool | Cytokine             | Day | Group    | Response Rate | 95% CI          |
|-----|-------|--------------|----------------------|-----|----------|---------------|-----------------|
|     |       | Ag85B        | 2_of_3_IFNg_IL2_TNFa | 0   | Placebo  | 0/11 = 0.0%   | ( 0.0%, 25.9%)  |
|     |       |              |                      |     | H4:IC31  | 0/24 = 0.0%   | ( 0.0%, 13.8%)  |
|     |       |              |                      |     | H56:IC31 | 1/22 = 4.5%   | ( 0.8%, 21.8%)  |
|     |       |              |                      |     | BCG      | 0/24 = 0.0%   | ( 0.0%, 13.8%)  |
|     |       |              |                      | 14  | Placebo  | 0/11 = 0.0%   | ( 0.0%, 25.9%)  |
|     |       |              |                      |     | H4:IC31  | 3/21 = 14.3%  | ( 5.0%, 34.6%)  |
|     |       |              |                      |     | H56:IC31 | 6/23 = 26.1%  | ( 12.5%, 46.5%) |
|     |       |              |                      | 28  | BCG      | 0/20 = 0.0%   | ( 0.0%, 16.1%)  |
|     |       |              |                      | 70  | Placebo  | 0/11 = 0.0%   | ( 0.0%, 25.9%)  |
|     |       |              |                      |     | H4:IC31  | 12/20 = 60.0% | ( 38.7%, 78.1%) |
|     |       |              |                      |     | H56:IC31 | 13/20 = 65.0% | ( 43.3%, 81.9%) |
|     |       |              |                      |     | BCG      | 0/18 = 0.0%   | ( 0.0%, 17.6%)  |
|     |       |              |                      | 168 | Placebo  | 0/10 = 0.0%   | ( 0.0%, 27.8%)  |
|     |       |              |                      |     | H4:IC31  | 15/23 = 65.2% | ( 44.9%, 81.2%) |
|     |       |              |                      |     | H56:IC31 | 9/21 = 42.9%  | ( 24.5%, 63.5%) |
|     |       |              |                      |     | BCG      | 2/23 = 8.7%   | ( 2.4%, 26.8%)  |

**Unreliable samples are excluded.**

**Records are excluded if the number of T-cell subsets is < 1,000**

**These criteria are applied separately to CD4+ and CD8+ subsets.**

**95% confidence intervals are constructed using Wilson's score method.**

**HVTN 602 / AERAS A-042: A randomized, placebo-controlled, partially blinded phase 1b clinical trial to evaluate the safety and immunogenicity of BCG revaccination, H4:IC31, and H56:IC31 in healthy, HIV-1-uninfected adolescent participants**

**Lab PT Report**

**Data as of February 5, 2018**

**Table 1**

**ICS Response Rates Using MIMOSA**

| Lab | Tcell | Peptide Pool | Cytokine             | Day | Group    | Response Rate | 95% CI         |
|-----|-------|--------------|----------------------|-----|----------|---------------|----------------|
|     |       | ESAT-6       | 2_of_3_IFNg_IL2_TNFa | 0   | Placebo  | 0/11 = 0.0%   | ( 0.0%, 25.9%) |
|     |       |              |                      |     | H4:IC31  | 0/24 = 0.0%   | ( 0.0%, 13.8%) |
|     |       |              |                      |     | H56:IC31 | 1/22 = 4.5%   | ( 0.8%, 21.8%) |
|     |       |              |                      |     | BCG      | 0/24 = 0.0%   | ( 0.0%, 13.8%) |
|     |       |              |                      | 14  | Placebo  | 0/11 = 0.0%   | ( 0.0%, 25.9%) |
|     |       |              |                      |     | H4:IC31  | 0/22 = 0.0%   | ( 0.0%, 14.9%) |
|     |       |              |                      |     | H56:IC31 | 1/22 = 4.5%   | ( 0.8%, 21.8%) |
|     |       |              |                      | 28  | BCG      | 0/20 = 0.0%   | ( 0.0%, 16.1%) |
|     |       |              |                      | 70  | Placebo  | 0/11 = 0.0%   | ( 0.0%, 25.9%) |
|     |       |              |                      |     | H4:IC31  | 0/20 = 0.0%   | ( 0.0%, 16.1%) |
|     |       |              |                      |     | H56:IC31 | 3/20 = 15.0%  | ( 5.2%, 36.0%) |
|     |       |              |                      |     | BCG      | 0/18 = 0.0%   | ( 0.0%, 17.6%) |
|     |       |              |                      | 168 | Placebo  | 0/10 = 0.0%   | ( 0.0%, 27.8%) |
|     |       |              |                      |     | H4:IC31  | 1/23 = 4.3%   | ( 0.8%, 21.0%) |
|     |       |              |                      |     | H56:IC31 | 2/21 = 9.5%   | ( 2.7%, 28.9%) |
|     |       |              |                      |     | BCG      | 0/23 = 0.0%   | ( 0.0%, 14.3%) |

**Unreliable samples are excluded.**

**Records are excluded if the number of T-cell subsets is < 1,000**

**These criteria are applied separately to CD4+ and CD8+ subsets.**

**95% confidence intervals are constructed using Wilson's score method.**

**HVTN 602 / AERAS A-042: A randomized, placebo-controlled, partially blinded phase 1b clinical trial to evaluate the safety and immunogenicity of BCG revaccination, H4:IC31, and H56:IC31 in healthy, HIV-1-uninfected adolescent participants**

**Lab PT Report**

**Data as of February 5, 2018**

**Table 1**

**ICS Response Rates Using MIMOSA**

| <i>Lab</i> | <i>Tcell</i> | <i>Peptide Pool</i>  | <i>Cytokine</i> | <i>Day</i> | <i>Group</i> | <i>Response Rate</i> | <i>95% CI</i>  |
|------------|--------------|----------------------|-----------------|------------|--------------|----------------------|----------------|
|            | Rv2660c      | 2_of_3_IFNg_IL2_TNFa |                 | 0          | Placebo      | 0/11 = 0.0%          | ( 0.0%, 25.9%) |
|            |              |                      |                 |            | H4:IC31      | 0/24 = 0.0%          | ( 0.0%, 13.8%) |
|            |              |                      |                 |            | H56:IC31     | 0/22 = 0.0%          | ( 0.0%, 14.9%) |
|            |              |                      |                 |            | BCG          | 0/24 = 0.0%          | ( 0.0%, 13.8%) |
|            |              |                      |                 | 14         | Placebo      | 0/11 = 0.0%          | ( 0.0%, 25.9%) |
|            |              |                      |                 |            | H4:IC31      | 0/22 = 0.0%          | ( 0.0%, 14.9%) |
|            |              |                      |                 |            | H56:IC31     | 0/23 = 0.0%          | ( 0.0%, 14.3%) |
|            |              |                      |                 | 28         | BCG          | 0/20 = 0.0%          | ( 0.0%, 16.1%) |
|            |              |                      |                 | 70         | Placebo      | 0/11 = 0.0%          | ( 0.0%, 25.9%) |
|            |              |                      |                 |            | H4:IC31      | 0/20 = 0.0%          | ( 0.0%, 16.1%) |
|            |              |                      |                 |            | H56:IC31     | 0/20 = 0.0%          | ( 0.0%, 16.1%) |
|            |              |                      |                 |            | BCG          | 0/18 = 0.0%          | ( 0.0%, 17.6%) |
|            |              |                      |                 | 168        | Placebo      | 0/10 = 0.0%          | ( 0.0%, 27.8%) |
|            |              |                      |                 |            | H4:IC31      | 0/23 = 0.0%          | ( 0.0%, 14.3%) |
|            |              |                      |                 |            | H56:IC31     | 0/21 = 0.0%          | ( 0.0%, 15.5%) |
|            |              |                      |                 |            | BCG          | 0/23 = 0.0%          | ( 0.0%, 14.3%) |

**Unreliable samples are excluded.**

**Records are excluded if the number of T-cell subsets is < 1,000**

**These criteria are applied separately to CD4+ and CD8+ subsets.**

**95% confidence intervals are constructed using Wilson's score method.**

**HVTN 602 / AERAS A-042: A randomized, placebo-controlled, partially blinded phase 1b clinical trial to evaluate the safety and immunogenicity of BCG revaccination, H4:IC31, and H56:IC31 in healthy, HIV-1-uninfected adolescent participants**

**Lab PT Report**

**Data as of February 5, 2018**

**Table 1**

**ICS Response Rates Using MIMOSA**

| <i>Lab</i> | <i>Tcell</i> | <i>Peptide Pool</i>  | <i>Cytokine</i> | <i>Day</i> | <i>Group</i> | <i>Response Rate</i> | <i>95% CI</i>   |
|------------|--------------|----------------------|-----------------|------------|--------------|----------------------|-----------------|
|            | TB 10.4      | 2_of_3_IFNg_IL2_TNFa |                 | 0          | Placebo      | 0/11 = 0.0%          | ( 0.0%, 25.9%)  |
|            |              |                      |                 |            | H4:IC31      | 0/22 = 0.0%          | ( 0.0%, 14.9%)  |
|            |              |                      |                 |            | H56:IC31     | 5/20 = 25.0%         | ( 11.2%, 46.9%) |
|            |              |                      |                 |            | BCG          | 1/23 = 4.3%          | ( 0.8%, 21.0%)  |
|            |              |                      |                 | 14         | Placebo      | 0/11 = 0.0%          | ( 0.0%, 25.9%)  |
|            |              |                      |                 |            | H4:IC31      | 2/22 = 9.1%          | ( 2.5%, 27.8%)  |
|            |              |                      |                 |            | H56:IC31     | 2/23 = 8.7%          | ( 2.4%, 26.8%)  |
|            |              |                      |                 | 28         | BCG          | 4/20 = 20.0%         | ( 8.1%, 41.6%)  |
|            |              |                      |                 | 70         | Placebo      | 0/11 = 0.0%          | ( 0.0%, 25.9%)  |
|            |              |                      |                 |            | H4:IC31      | 7/19 = 36.8%         | ( 19.1%, 59.0%) |
|            |              |                      |                 |            | H56:IC31     | 3/18 = 16.7%         | ( 5.8%, 39.2%)  |
|            |              |                      |                 |            | BCG          | 2/17 = 11.8%         | ( 3.3%, 34.3%)  |
|            |              |                      |                 | 168        | Placebo      | 0/10 = 0.0%          | ( 0.0%, 27.8%)  |
|            |              |                      |                 |            | H4:IC31      | 7/23 = 30.4%         | ( 15.6%, 50.9%) |
|            |              |                      |                 |            | H56:IC31     | 2/21 = 9.5%          | ( 2.7%, 28.9%)  |
|            |              |                      |                 |            | BCG          | 4/23 = 17.4%         | ( 7.0%, 37.1%)  |

**Unreliable samples are excluded.**

**Records are excluded if the number of T-cell subsets is < 1,000**

**These criteria are applied separately to CD4+ and CD8+ subsets.**

**95% confidence intervals are constructed using Wilson's score method.**

**HVTN 602 / AERAS A-042: A randomized, placebo-controlled, partially blinded phase 1b clinical trial to evaluate the safety and immunogenicity of BCG revaccination, H4:IC31, and H56:IC31 in healthy, HIV-1-uninfected adolescent participants**

**Lab PT Report**

**Data as of February 5, 2018**

**Table 1**

**ICS Response Rates Using MIMOSA**

| <i>Lab</i> | <i>Tcell</i> | <i>Peptide Pool</i>  | <i>Cytokine</i> | <i>Day</i> | <i>Group</i> | <i>Response Rate</i> | <i>95% CI</i>   |
|------------|--------------|----------------------|-----------------|------------|--------------|----------------------|-----------------|
|            | CMV          | 2_of_3_IFNg_IL2_TNFa |                 | 0          | Placebo      | 9/11 = 81.8%         | ( 52.3%, 94.9%) |
|            |              |                      |                 |            | H4:IC31      | 13/22 = 59.1%        | ( 38.7%, 76.7%) |
|            |              |                      |                 |            | H56:IC31     | 9/17 = 52.9%         | ( 31.0%, 73.8%) |
|            |              |                      |                 |            | BCG          | 17/21 = 81.0%        | ( 60.0%, 92.3%) |
|            |              |                      |                 | 14         | Placebo      | 6/10 = 60.0%         | ( 31.3%, 83.2%) |
|            |              |                      |                 |            | H4:IC31      | 15/20 = 75.0%        | ( 53.1%, 88.8%) |
|            |              |                      |                 |            | H56:IC31     | 13/22 = 59.1%        | ( 38.7%, 76.7%) |
|            |              |                      |                 | 28         | BCG          | 15/18 = 83.3%        | ( 60.8%, 94.2%) |
|            |              |                      |                 | 70         | Placebo      | 7/10 = 70.0%         | ( 39.7%, 89.2%) |
|            |              |                      |                 |            | H4:IC31      | 9/17 = 52.9%         | ( 31.0%, 73.8%) |
|            |              |                      |                 |            | H56:IC31     | 10/13 = 76.9%        | ( 49.7%, 91.8%) |
|            |              |                      |                 |            | BCG          | 14/16 = 87.5%        | ( 64.0%, 96.5%) |
|            |              |                      |                 | 168        | Placebo      | 7/ 9 = 77.8%         | ( 45.3%, 93.7%) |
|            |              |                      |                 |            | H4:IC31      | 13/16 = 81.3%        | ( 57.0%, 93.4%) |
|            |              |                      |                 |            | H56:IC31     | 9/12 = 75.0%         | ( 46.8%, 91.1%) |
|            |              |                      |                 |            | BCG          | 12/13 = 92.3%        | ( 66.7%, 98.6%) |

**Unreliable samples are excluded.**

**Records are excluded if the number of T-cell subsets is < 1,000**

**These criteria are applied separately to CD4+ and CD8+ subsets.**

**95% confidence intervals are constructed using Wilson's score method.**

**HVTN 602 / AERAS A-042: A randomized, placebo-controlled, partially blinded phase 1b clinical trial to evaluate the safety and immunogenicity of BCG revaccination, H4:IC31, and H56:IC31 in healthy, HIV-1-uninfected adolescent participants**

**Lab PT Report**

**Data as of February 5, 2018**

**Table 1**

**ICS Response Rates Using MIMOSA**

| <i>Lab</i> | <i>Tcell</i> | <i>Peptide Pool</i>  | <i>Cytokine</i> | <i>Day</i> | <i>Group</i> | <i>Response Rate</i> | <i>95% CI</i>   |
|------------|--------------|----------------------|-----------------|------------|--------------|----------------------|-----------------|
| CD8+       | BCG-Pasteur  | 2_of_3_IFNg_IL2_TNFa |                 | 0          | Placebo      | 1/11 = 9.1%          | ( 1.6%, 37.7%)  |
|            |              |                      |                 |            | H4:IC31      | 5/23 = 21.7%         | ( 9.7%, 41.9%)  |
|            |              |                      |                 |            | H56:IC31     | 2/22 = 9.1%          | ( 2.5%, 27.8%)  |
|            |              |                      |                 |            | BCG          | 5/24 = 20.8%         | ( 9.2%, 40.5%)  |
|            |              |                      |                 | 14         | Placebo      | 0/10 = 0.0%          | ( 0.0%, 27.8%)  |
|            |              |                      |                 |            | H4:IC31      | 5/22 = 22.7%         | ( 10.1%, 43.4%) |
|            |              |                      |                 |            | H56:IC31     | 2/22 = 9.1%          | ( 2.5%, 27.8%)  |
|            |              |                      |                 | 28         | BCG          | 2/20 = 10.0%         | ( 2.8%, 30.1%)  |
|            |              |                      |                 | 70         | Placebo      | 1/11 = 9.1%          | ( 1.6%, 37.7%)  |
|            |              |                      |                 |            | H4:IC31      | 6/20 = 30.0%         | ( 14.5%, 51.9%) |
|            |              |                      |                 |            | H56:IC31     | 1/20 = 5.0%          | ( 0.9%, 23.6%)  |
|            |              |                      |                 |            | BCG          | 4/18 = 22.2%         | ( 9.0%, 45.2%)  |
| 168        | Placebo      | 0/10 = 0.0%          | ( 0.0%, 27.8%)  |            |              |                      |                 |
|            | H4:IC31      | 5/20 = 25.0%         | ( 11.2%, 46.9%) |            |              |                      |                 |
|            | H56:IC31     | 1/20 = 5.0%          | ( 0.9%, 23.6%)  |            |              |                      |                 |
|            | BCG          | 0/18 = 0.0%          | ( 0.0%, 17.6%)  |            |              |                      |                 |

**Unreliable samples are excluded.**

**Records are excluded if the number of T-cell subsets is < 1,000**

**These criteria are applied separately to CD4+ and CD8+ subsets.**

**95% confidence intervals are constructed using Wilson's score method.**

**HVTN 602 / AERAS A-042: A randomized, placebo-controlled, partially blinded phase 1b clinical trial to evaluate the safety and immunogenicity of BCG revaccination, H4:IC31, and H56:IC31 in healthy, HIV-1-uninfected adolescent participants**

**Lab PT Report**

**Data as of February 5, 2018**

**Table 1**

**ICS Response Rates Using MIMOSA**

| Lab | Tcell | Peptide Pool | Cytokine             | Day | Group    | Response Rate | 95% CI         |
|-----|-------|--------------|----------------------|-----|----------|---------------|----------------|
|     |       | Ag85B        | 2_of_3_IFNg_IL2_TNFa | 0   | Placebo  | 0/11 = 0.0%   | ( 0.0%, 25.9%) |
|     |       |              |                      |     | H4:IC31  | 0/24 = 0.0%   | ( 0.0%, 13.8%) |
|     |       |              |                      |     | H56:IC31 | 0/22 = 0.0%   | ( 0.0%, 14.9%) |
|     |       |              |                      |     | BCG      | 0/24 = 0.0%   | ( 0.0%, 13.8%) |
|     |       |              |                      | 14  | Placebo  | 0/11 = 0.0%   | ( 0.0%, 25.9%) |
|     |       |              |                      |     | H4:IC31  | 0/21 = 0.0%   | ( 0.0%, 15.5%) |
|     |       |              |                      |     | H56:IC31 | 0/23 = 0.0%   | ( 0.0%, 14.3%) |
|     |       |              |                      | 28  | BCG      | 0/20 = 0.0%   | ( 0.0%, 16.1%) |
|     |       |              |                      | 70  | Placebo  | 0/11 = 0.0%   | ( 0.0%, 25.9%) |
|     |       |              |                      |     | H4:IC31  | 0/20 = 0.0%   | ( 0.0%, 16.1%) |
|     |       |              |                      |     | H56:IC31 | 0/20 = 0.0%   | ( 0.0%, 16.1%) |
|     |       |              |                      |     | BCG      | 0/18 = 0.0%   | ( 0.0%, 17.6%) |
|     |       |              |                      | 168 | Placebo  | 0/10 = 0.0%   | ( 0.0%, 27.8%) |
|     |       |              |                      |     | H4:IC31  | 0/23 = 0.0%   | ( 0.0%, 14.3%) |
|     |       |              |                      |     | H56:IC31 | 0/21 = 0.0%   | ( 0.0%, 15.5%) |
|     |       |              |                      |     | BCG      | 0/23 = 0.0%   | ( 0.0%, 14.3%) |

**Unreliable samples are excluded.**

**Records are excluded if the number of T-cell subsets is < 1,000**

**These criteria are applied separately to CD4+ and CD8+ subsets.**

**95% confidence intervals are constructed using Wilson's score method.**



**HVTN 602 / AERAS A-042: A randomized, placebo-controlled, partially blinded phase 1b clinical trial to evaluate the safety and immunogenicity of BCG revaccination, H4:IC31, and H56:IC31 in healthy, HIV-1-uninfected adolescent participants**

**Lab PT Report**

**Data as of February 5, 2018**

**Table 1**

**ICS Response Rates Using MIMOSA**

| Lab | Tcell | Peptide Pool | Cytokine             | Day | Group    | Response Rate | 95% CI         |
|-----|-------|--------------|----------------------|-----|----------|---------------|----------------|
|     |       | ESAT-6       | 2_of_3_IFNg_IL2_TNFa | 0   | Placebo  | 0/11 = 0.0%   | ( 0.0%, 25.9%) |
|     |       |              |                      |     | H4:IC31  | 0/24 = 0.0%   | ( 0.0%, 13.8%) |
|     |       |              |                      |     | H56:IC31 | 0/22 = 0.0%   | ( 0.0%, 14.9%) |
|     |       |              |                      |     | BCG      | 0/24 = 0.0%   | ( 0.0%, 13.8%) |
|     |       |              |                      | 14  | Placebo  | 0/11 = 0.0%   | ( 0.0%, 25.9%) |
|     |       |              |                      |     | H4:IC31  | 0/22 = 0.0%   | ( 0.0%, 14.9%) |
|     |       |              |                      |     | H56:IC31 | 0/22 = 0.0%   | ( 0.0%, 14.9%) |
|     |       |              |                      | 28  | BCG      | 0/20 = 0.0%   | ( 0.0%, 16.1%) |
|     |       |              |                      | 70  | Placebo  | 0/11 = 0.0%   | ( 0.0%, 25.9%) |
|     |       |              |                      |     | H4:IC31  | 0/20 = 0.0%   | ( 0.0%, 16.1%) |
|     |       |              |                      |     | H56:IC31 | 0/20 = 0.0%   | ( 0.0%, 16.1%) |
|     |       |              |                      |     | BCG      | 0/18 = 0.0%   | ( 0.0%, 17.6%) |
|     |       |              |                      | 168 | Placebo  | 0/10 = 0.0%   | ( 0.0%, 27.8%) |
|     |       |              |                      |     | H4:IC31  | 0/23 = 0.0%   | ( 0.0%, 14.3%) |
|     |       |              |                      |     | H56:IC31 | 0/21 = 0.0%   | ( 0.0%, 15.5%) |
|     |       |              |                      |     | BCG      | 0/23 = 0.0%   | ( 0.0%, 14.3%) |

**Unreliable samples are excluded.**

**Records are excluded if the number of T-cell subsets is < 1,000**

**These criteria are applied separately to CD4+ and CD8+ subsets.**

**95% confidence intervals are constructed using Wilson's score method.**

**HVTN 602 / AERAS A-042: A randomized, placebo-controlled, partially blinded phase 1b clinical trial to evaluate the safety and immunogenicity of BCG revaccination, H4:IC31, and H56:IC31 in healthy, HIV-1-uninfected adolescent participants**

**Lab PT Report**

**Data as of February 5, 2018**

**Table 1**

**ICS Response Rates Using MIMOSA**

| Lab | Tcell | Peptide Pool                 | Cytokine | Day | Group    | Response Rate | 95% CI         |
|-----|-------|------------------------------|----------|-----|----------|---------------|----------------|
|     |       | Rv2660c_2_of_3_IFNg_IL2_TNFa |          | 0   | Placebo  | 0/11 = 0.0%   | ( 0.0%, 25.9%) |
|     |       |                              |          |     | H4:IC31  | 0/24 = 0.0%   | ( 0.0%, 13.8%) |
|     |       |                              |          |     | H56:IC31 | 0/22 = 0.0%   | ( 0.0%, 14.9%) |
|     |       |                              |          |     | BCG      | 0/24 = 0.0%   | ( 0.0%, 13.8%) |
|     |       |                              |          | 14  | Placebo  | 0/11 = 0.0%   | ( 0.0%, 25.9%) |
|     |       |                              |          |     | H4:IC31  | 0/22 = 0.0%   | ( 0.0%, 14.9%) |
|     |       |                              |          |     | H56:IC31 | 0/23 = 0.0%   | ( 0.0%, 14.3%) |
|     |       |                              |          | 28  | BCG      | 0/20 = 0.0%   | ( 0.0%, 16.1%) |
|     |       |                              |          | 70  | Placebo  | 0/11 = 0.0%   | ( 0.0%, 25.9%) |
|     |       |                              |          |     | H4:IC31  | 0/20 = 0.0%   | ( 0.0%, 16.1%) |
|     |       |                              |          |     | H56:IC31 | 0/20 = 0.0%   | ( 0.0%, 16.1%) |
|     |       |                              |          |     | BCG      | 0/18 = 0.0%   | ( 0.0%, 17.6%) |
|     |       |                              |          | 168 | Placebo  | 0/10 = 0.0%   | ( 0.0%, 27.8%) |
|     |       |                              |          |     | H4:IC31  | 0/23 = 0.0%   | ( 0.0%, 14.3%) |
|     |       |                              |          |     | H56:IC31 | 0/21 = 0.0%   | ( 0.0%, 15.5%) |
|     |       |                              |          |     | BCG      | 0/23 = 0.0%   | ( 0.0%, 14.3%) |

**Unreliable samples are excluded.**

**Records are excluded if the number of T-cell subsets is < 1,000**

**These criteria are applied separately to CD4+ and CD8+ subsets.**

**95% confidence intervals are constructed using Wilson's score method.**

**HVTN 602 / AERAS A-042: A randomized, placebo-controlled, partially blinded phase 1b clinical trial to evaluate the safety and immunogenicity of BCG revaccination, H4:IC31, and H56:IC31 in healthy, HIV-1-uninfected adolescent participants**

**Lab PT Report**

**Data as of February 5, 2018**

**Table 1**

**ICS Response Rates Using MIMOSA**

| Lab | Tcell   | Peptide Pool         | Cytokine | Day | Group    | Response Rate | 95% CI         |
|-----|---------|----------------------|----------|-----|----------|---------------|----------------|
|     | TB 10.4 | 2_of_3_IFNg_IL2_TNFa |          | 0   | Placebo  | 0/11 = 0.0%   | ( 0.0%, 25.9%) |
|     |         |                      |          |     | H4:IC31  | 0/22 = 0.0%   | ( 0.0%, 14.9%) |
|     |         |                      |          |     | H56:IC31 | 0/20 = 0.0%   | ( 0.0%, 16.1%) |
|     |         |                      |          |     | BCG      | 0/23 = 0.0%   | ( 0.0%, 14.3%) |
|     |         |                      |          | 14  | Placebo  | 0/11 = 0.0%   | ( 0.0%, 25.9%) |
|     |         |                      |          |     | H4:IC31  | 0/22 = 0.0%   | ( 0.0%, 14.9%) |
|     |         |                      |          |     | H56:IC31 | 0/23 = 0.0%   | ( 0.0%, 14.3%) |
|     |         |                      |          | 28  | BCG      | 0/20 = 0.0%   | ( 0.0%, 16.1%) |
|     |         |                      |          | 70  | Placebo  | 0/11 = 0.0%   | ( 0.0%, 25.9%) |
|     |         |                      |          |     | H4:IC31  | 0/19 = 0.0%   | ( 0.0%, 16.8%) |
|     |         |                      |          |     | H56:IC31 | 0/18 = 0.0%   | ( 0.0%, 17.6%) |
|     |         |                      |          |     | BCG      | 0/17 = 0.0%   | ( 0.0%, 18.4%) |
|     |         |                      |          | 168 | Placebo  | 0/10 = 0.0%   | ( 0.0%, 27.8%) |
|     |         |                      |          |     | H4:IC31  | 0/23 = 0.0%   | ( 0.0%, 14.3%) |
|     |         |                      |          |     | H56:IC31 | 0/21 = 0.0%   | ( 0.0%, 15.5%) |
|     |         |                      |          |     | BCG      | 0/23 = 0.0%   | ( 0.0%, 14.3%) |

**Unreliable samples are excluded.**

**Records are excluded if the number of T-cell subsets is < 1,000**

**These criteria are applied separately to CD4+ and CD8+ subsets.**

**95% confidence intervals are constructed using Wilson's score method.**

**HVTN 602 / AERAS A-042: A randomized, placebo-controlled, partially blinded phase 1b clinical trial to evaluate the safety and immunogenicity of BCG revaccination, H4:IC31, and H56:IC31 in healthy, HIV-1-uninfected adolescent participants**

**Lab PT Report**

**Data as of February 5, 2018**

**Table 1**

**ICS Response Rates Using MIMOSA**

| Lab | Tcell | Peptide Pool | Cytokine             | Day | Group    | Response Rate | 95% CI           |
|-----|-------|--------------|----------------------|-----|----------|---------------|------------------|
|     |       | CMV          | 2_of_3_IFNg_IL2_TNFa | 0   | Placebo  | 9/11 = 81.8%  | ( 52.3%, 94.9%)  |
|     |       |              |                      |     | H4:IC31  | 19/22 = 86.4% | ( 66.7%, 95.3%)  |
|     |       |              |                      |     | H56:IC31 | 17/17 =100.0% | ( 81.6%, 100.0%) |
|     |       |              |                      |     | BCG      | 19/21 = 90.5% | ( 71.1%, 97.3%)  |
|     |       |              |                      | 14  | Placebo  | 10/10 =100.0% | ( 72.2%, 100.0%) |
|     |       |              |                      |     | H4:IC31  | 18/20 = 90.0% | ( 69.9%, 97.2%)  |
|     |       |              |                      |     | H56:IC31 | 22/22 =100.0% | ( 85.1%, 100.0%) |
|     |       |              |                      | 28  | BCG      | 17/18 = 94.4% | ( 74.2%, 99.0%)  |
|     |       |              |                      | 70  | Placebo  | 10/10 =100.0% | ( 72.2%, 100.0%) |
|     |       |              |                      |     | H4:IC31  | 15/17 = 88.2% | ( 65.7%, 96.7%)  |
|     |       |              |                      |     | H56:IC31 | 12/13 = 92.3% | ( 66.7%, 98.6%)  |
|     |       |              |                      |     | BCG      | 13/16 = 81.3% | ( 57.0%, 93.4%)  |
|     |       |              |                      | 168 | Placebo  | 9/ 9 =100.0%  | ( 70.1%, 100.0%) |
|     |       |              |                      |     | H4:IC31  | 15/16 = 93.8% | ( 71.7%, 98.9%)  |
|     |       |              |                      |     | H56:IC31 | 12/12 =100.0% | ( 75.8%, 100.0%) |
|     |       |              |                      |     | BCG      | 12/13 = 92.3% | ( 66.7%, 98.6%)  |

**Unreliable samples are excluded.**

**Records are excluded if the number of T-cell subsets is < 1,000**

**These criteria are applied separately to CD4+ and CD8+ subsets.**

**95% confidence intervals are constructed using Wilson's score method.**

**HVTN 602 / AERAS A-042: A randomized, placebo-controlled, partially blinded phase 1b clinical trial to evaluate the safety and immunogenicity of BCG revaccination, H4:IC31, and H56:IC31 in healthy, HIV-1-uninfected adolescent participants**

**Lab PT Report**

**Data as of February 5, 2018**

**Table 2**

**Response Rates by Fisher's Exact Test, MIMOSA, and MIMOSA2**

| Lab | Tcell    | Peptide              | Cytokine             | Day           | Group    | Fisher         | MIMOSA         | MIMOSA2       |
|-----|----------|----------------------|----------------------|---------------|----------|----------------|----------------|---------------|
| CH  | CD4+     | BCG-Pasteur          | 2_of_3_IFNg_IL2_TNFa | 0             | Placebo  | 4/11 = 36.36%  | 4/11 = 36.36%  |               |
|     |          |                      |                      |               | H4:IC31  | 5/23 = 21.74%  | 5/23 = 21.74%  |               |
|     |          |                      |                      |               | H56:IC31 | 6/22 = 27.27%  | 7/22 = 31.82%  |               |
|     |          |                      |                      |               | BCG      | 4/24 = 16.67%  | 6/24 = 25.00%  |               |
|     |          |                      |                      | 14            | Placebo  | 2/10 = 20.00%  | 2/10 = 20.00%  | 0/10 = 0.00%  |
|     |          |                      |                      |               | H4:IC31  | 1/22 = 4.55%   | 1/22 = 4.55%   | 0/22 = 0.00%  |
|     |          |                      |                      |               | H56:IC31 | 6/22 = 27.27%  | 6/22 = 27.27%  | 2/22 = 9.09%  |
|     |          |                      |                      | 28            | BCG      | 10/20 = 50.00% | 10/20 = 50.00% | 7/20 = 35.00% |
|     |          |                      |                      | 70            | Placebo  | 2/11 = 18.18%  | 2/11 = 18.18%  | 0/11 = 0.00%  |
|     |          |                      |                      |               | H4:IC31  | 3/20 = 15.00%  | 4/20 = 20.00%  | 0/20 = 0.00%  |
|     |          |                      |                      |               | H56:IC31 | 9/20 = 45.00%  | 10/20 = 50.00% | 0/20 = 0.00%  |
|     |          |                      |                      |               | BCG      | 10/18 = 55.56% | 10/18 = 55.56% | 8/18 = 44.44% |
| 168 | Placebo  | 3/10 = 30.00%        | 4/10 = 40.00%        | 0/10 = 0.00%  |          |                |                |               |
|     | H4:IC31  | 0/20 = 0.00%         | 0/20 = 0.00%         | 0/20 = 0.00%  |          |                |                |               |
|     | H56:IC31 | 6/20 = 30.00%        | 7/20 = 35.00%        | 2/20 = 10.00% |          |                |                |               |
|     | BCG      | 6/18 = 33.33%        | 6/18 = 33.33%        | 4/18 = 22.22% |          |                |                |               |
|     | Ag85B    | 2_of_3_IFNg_IL2_TNFa |                      | 0             | Placebo  | 0/11 = 0.00%   | 0/11 = 0.00%   |               |

**Unreliable samples are excluded.**

**Records are excluded if the number of T-cell subsets is < 1,000**

**These criteria are applied separately to CD4+ and CD8+ subsets.**

**HVTN 602 / AERAS A-042: A randomized, placebo-controlled, partially blinded phase 1b clinical trial to evaluate the safety and immunogenicity of BCG revaccination, H4:IC31, and H56:IC31 in healthy, HIV-1-uninfected adolescent participants**

**Lab PT Report**

**Data as of February 5, 2018**

**Table 2**

**Response Rates by Fisher's Exact Test, MIMOSA, and MIMOSA2**

| Lab | Tcell  | Peptide              | Cytokine | Day | Group    | Fisher         | MIMOSA         | MIMOSA2        |
|-----|--------|----------------------|----------|-----|----------|----------------|----------------|----------------|
|     |        |                      |          |     | H4:IC31  | 0/24 = 0.00%   | 0/24 = 0.00%   |                |
|     |        |                      |          |     | H56:IC31 | 1/22 = 4.55%   | 1/22 = 4.55%   |                |
|     |        |                      |          |     | BCG      | 0/24 = 0.00%   | 0/24 = 0.00%   |                |
|     |        |                      |          | 14  | Placebo  | 0/11 = 0.00%   | 0/11 = 0.00%   | 0/11 = 0.00%   |
|     |        |                      |          |     | H4:IC31  | 3/21 = 14.29%  | 3/21 = 14.29%  | 2/21 = 9.52%   |
|     |        |                      |          |     | H56:IC31 | 6/23 = 26.09%  | 6/23 = 26.09%  | 1/23 = 4.35%   |
|     |        |                      |          | 28  | BCG      | 0/20 = 0.00%   | 0/20 = 0.00%   | 0/20 = 0.00%   |
|     |        |                      |          | 70  | Placebo  | 0/11 = 0.00%   | 0/11 = 0.00%   | 0/11 = 0.00%   |
|     |        |                      |          |     | H4:IC31  | 12/20 = 60.00% | 12/20 = 60.00% | 12/20 = 60.00% |
|     |        |                      |          |     | H56:IC31 | 13/20 = 65.00% | 13/20 = 65.00% | 10/20 = 50.00% |
|     |        |                      |          |     | BCG      | 0/18 = 0.00%   | 0/18 = 0.00%   | 0/18 = 0.00%   |
|     |        |                      |          | 168 | Placebo  | 0/10 = 0.00%   | 0/10 = 0.00%   | 0/10 = 0.00%   |
|     |        |                      |          |     | H4:IC31  | 16/23 = 69.57% | 15/23 = 65.22% | 13/23 = 56.52% |
|     |        |                      |          |     | H56:IC31 | 8/21 = 38.10%  | 9/21 = 42.86%  | 6/21 = 28.57%  |
|     |        |                      |          |     | BCG      | 2/23 = 8.70%   | 2/23 = 8.70%   | 2/23 = 8.70%   |
|     | ESAT-6 | 2_of_3_IFNg_IL2_TNFa |          | 0   | Placebo  | 0/11 = 0.00%   | 0/11 = 0.00%   |                |
|     |        |                      |          |     | H4:IC31  | 0/24 = 0.00%   | 0/24 = 0.00%   |                |

**Unreliable samples are excluded.**

**Records are excluded if the number of T-cell subsets is < 1,000**

**These criteria are applied separately to CD4+ and CD8+ subsets.**

**HVTN 602 / AERAS A-042: A randomized, placebo-controlled, partially blinded phase 1b clinical trial to evaluate the safety and immunogenicity of BCG revaccination, H4:IC31, and H56:IC31 in healthy, HIV-1-uninfected adolescent participants**

**Lab PT Report**

**Data as of February 5, 2018**

**Table 2**

**Response Rates by Fisher's Exact Test, MIMOSA, and MIMOSA2**

| Lab | Tcell   | Peptide              | Cytokine | Day | Group    | Fisher        | MIMOSA        | MIMOSA2       |
|-----|---------|----------------------|----------|-----|----------|---------------|---------------|---------------|
|     |         |                      |          |     | H56:IC31 | 1/22 = 4.55%  | 1/22 = 4.55%  |               |
|     |         |                      |          |     | BCG      | 0/24 = 0.00%  | 0/24 = 0.00%  |               |
|     |         |                      |          | 14  | Placebo  | 0/11 = 0.00%  | 0/11 = 0.00%  | 0/11 = 0.00%  |
|     |         |                      |          |     | H4:IC31  | 0/22 = 0.00%  | 0/22 = 0.00%  | 0/22 = 0.00%  |
|     |         |                      |          |     | H56:IC31 | 1/22 = 4.55%  | 1/22 = 4.55%  | 1/22 = 4.55%  |
|     |         |                      |          | 28  | BCG      | 0/20 = 0.00%  | 0/20 = 0.00%  | 0/20 = 0.00%  |
|     |         |                      |          | 70  | Placebo  | 0/11 = 0.00%  | 0/11 = 0.00%  | 0/11 = 0.00%  |
|     |         |                      |          |     | H4:IC31  | 0/20 = 0.00%  | 0/20 = 0.00%  | 0/20 = 0.00%  |
|     |         |                      |          |     | H56:IC31 | 3/20 = 15.00% | 3/20 = 15.00% | 3/20 = 15.00% |
|     |         |                      |          |     | BCG      | 0/18 = 0.00%  | 0/18 = 0.00%  | 0/18 = 0.00%  |
|     |         |                      |          | 168 | Placebo  | 0/10 = 0.00%  | 0/10 = 0.00%  | 0/10 = 0.00%  |
|     |         |                      |          |     | H4:IC31  | 1/23 = 4.35%  | 1/23 = 4.35%  | 1/23 = 4.35%  |
|     |         |                      |          |     | H56:IC31 | 2/21 = 9.52%  | 2/21 = 9.52%  | 2/21 = 9.52%  |
|     |         |                      |          |     | BCG      | 0/23 = 0.00%  | 0/23 = 0.00%  | 0/23 = 0.00%  |
|     | Rv2660c | 2_of_3_IFNg_IL2_TNFa |          | 0   | Placebo  | 0/11 = 0.00%  | 0/11 = 0.00%  |               |
|     |         |                      |          |     | H4:IC31  | 0/24 = 0.00%  | 0/24 = 0.00%  |               |
|     |         |                      |          |     | H56:IC31 | 0/22 = 0.00%  | 0/22 = 0.00%  |               |

**Unreliable samples are excluded.**

**Records are excluded if the number of T-cell subsets is < 1,000**

**These criteria are applied separately to CD4+ and CD8+ subsets.**

**HVTN 602 / AERAS A-042: A randomized, placebo-controlled, partially blinded phase 1b clinical trial to evaluate the safety and immunogenicity of BCG revaccination, H4:IC31, and H56:IC31 in healthy, HIV-1-uninfected adolescent participants**

**Lab PT Report**

Data as of February 5, 2018

**Table 2**

**Response Rates by Fisher's Exact Test, MIMOSA, and MIMOSA2**

| Lab | Tcell   | Peptide              | Cytokine | Day | Group    | Fisher        | MIMOSA        | MIMOSA2      |
|-----|---------|----------------------|----------|-----|----------|---------------|---------------|--------------|
|     |         |                      |          |     | BCG      | 0/24 = 0.00%  | 0/24 = 0.00%  |              |
|     |         |                      |          | 14  | Placebo  | 0/11 = 0.00%  | 0/11 = 0.00%  | 0/11 = 0.00% |
|     |         |                      |          |     | H4:IC31  | 0/22 = 0.00%  | 0/22 = 0.00%  | 0/22 = 0.00% |
|     |         |                      |          |     | H56:IC31 | 0/23 = 0.00%  | 0/23 = 0.00%  | 0/23 = 0.00% |
|     |         |                      |          | 28  | BCG      | 0/20 = 0.00%  | 0/20 = 0.00%  | 0/20 = 0.00% |
|     |         |                      |          | 70  | Placebo  | 0/11 = 0.00%  | 0/11 = 0.00%  | 0/11 = 0.00% |
|     |         |                      |          |     | H4:IC31  | 0/20 = 0.00%  | 0/20 = 0.00%  | 0/20 = 0.00% |
|     |         |                      |          |     | H56:IC31 | 0/20 = 0.00%  | 0/20 = 0.00%  | 0/20 = 0.00% |
|     |         |                      |          |     | BCG      | 0/18 = 0.00%  | 0/18 = 0.00%  | 0/18 = 0.00% |
|     |         |                      |          | 168 | Placebo  | 0/10 = 0.00%  | 0/10 = 0.00%  | 0/10 = 0.00% |
|     |         |                      |          |     | H4:IC31  | 0/23 = 0.00%  | 0/23 = 0.00%  | 1/23 = 4.35% |
|     |         |                      |          |     | H56:IC31 | 0/21 = 0.00%  | 0/21 = 0.00%  | 0/21 = 0.00% |
|     |         |                      |          |     | BCG      | 0/23 = 0.00%  | 0/23 = 0.00%  | 0/23 = 0.00% |
|     | TB 10.4 | 2_of_3_IFNg_IL2_TNFa |          | 0   | Placebo  | 0/11 = 0.00%  | 0/11 = 0.00%  |              |
|     |         |                      |          |     | H4:IC31  | 0/22 = 0.00%  | 0/22 = 0.00%  |              |
|     |         |                      |          |     | H56:IC31 | 5/20 = 25.00% | 5/20 = 25.00% |              |
|     |         |                      |          |     | BCG      | 1/23 = 4.35%  | 1/23 = 4.35%  |              |

**Unreliable samples are excluded.**

**Records are excluded if the number of T-cell subsets is < 1,000**

**These criteria are applied separately to CD4+ and CD8+ subsets.**



**HVTN 602 / AERAS A-042: A randomized, placebo-controlled, partially blinded phase 1b clinical trial to evaluate the safety and immunogenicity of BCG revaccination, H4:IC31, and H56:IC31 in healthy, HIV-1-uninfected adolescent participants**

**Lab PT Report**

Data as of February 5, 2018

**Table 2**

**Response Rates by Fisher's Exact Test, MIMOSA, and MIMOSA2**

| Lab | Tcell | Peptide              | Cytokine | Day | Group    | Fisher         | MIMOSA         | MIMOSA2       |
|-----|-------|----------------------|----------|-----|----------|----------------|----------------|---------------|
|     |       |                      |          | 14  | Placebo  | 0/11 = 0.00%   | 0/11 = 0.00%   | 0/11 = 0.00%  |
|     |       |                      |          |     | H4:IC31  | 2/22 = 9.09%   | 2/22 = 9.09%   | 1/22 = 4.55%  |
|     |       |                      |          |     | H56:IC31 | 2/23 = 8.70%   | 2/23 = 8.70%   | 0/23 = 0.00%  |
|     |       |                      |          | 28  | BCG      | 4/20 = 20.00%  | 4/20 = 20.00%  | 4/20 = 20.00% |
|     |       |                      |          | 70  | Placebo  | 0/11 = 0.00%   | 0/11 = 0.00%   | 0/11 = 0.00%  |
|     |       |                      |          |     | H4:IC31  | 7/19 = 36.84%  | 7/19 = 36.84%  | 7/19 = 36.84% |
|     |       |                      |          |     | H56:IC31 | 3/18 = 16.67%  | 3/18 = 16.67%  | 0/18 = 0.00%  |
|     |       |                      |          |     | BCG      | 2/17 = 11.76%  | 2/17 = 11.76%  | 1/17 = 5.88%  |
|     |       |                      |          | 168 | Placebo  | 0/10 = 0.00%   | 0/10 = 0.00%   | 0/10 = 0.00%  |
|     |       |                      |          |     | H4:IC31  | 7/23 = 30.43%  | 7/23 = 30.43%  | 6/23 = 26.09% |
|     |       |                      |          |     | H56:IC31 | 3/21 = 14.29%  | 2/21 = 9.52%   | 0/21 = 0.00%  |
|     |       |                      |          |     | BCG      | 4/23 = 17.39%  | 4/23 = 17.39%  | 2/23 = 8.70%  |
|     | CMV   | 2_of_3_IFNg_IL2_TNFa |          | 0   | Placebo  | 8/11 = 72.73%  | 9/11 = 81.82%  |               |
|     |       |                      |          |     | H4:IC31  | 12/22 = 54.55% | 13/22 = 59.09% |               |
|     |       |                      |          |     | H56:IC31 | 9/17 = 52.94%  | 9/17 = 52.94%  |               |
|     |       |                      |          |     | BCG      | 16/21 = 76.19% | 17/21 = 80.95% |               |

**Unreliable samples are excluded.**

**Records are excluded if the number of T-cell subsets is < 1,000**

**These criteria are applied separately to CD4+ and CD8+ subsets.**

**HVTN 602 / AERAS A-042: A randomized, placebo-controlled, partially blinded phase 1b clinical trial to evaluate the safety and immunogenicity of BCG revaccination, H4:IC31, and H56:IC31 in healthy, HIV-1-uninfected adolescent participants**

**Lab PT Report**

Data as of February 5, 2018

**Table 2**

**Response Rates by Fisher's Exact Test, MIMOSA, and MIMOSA2**

| Lab  | Tcell       | Peptide              | Cytokine | Day | Group    | Fisher         | MIMOSA         | MIMOSA2       |
|------|-------------|----------------------|----------|-----|----------|----------------|----------------|---------------|
|      |             |                      |          | 14  | Placebo  | 5/10 = 50.00%  | 6/10 = 60.00%  | 0/10 = 0.00%  |
|      |             |                      |          |     | H4:IC31  | 12/20 = 60.00% | 15/20 = 75.00% | 2/20 = 10.00% |
|      |             |                      |          |     | H56:IC31 | 13/22 = 59.09% | 13/22 = 59.09% | 2/22 = 9.09%  |
|      |             |                      |          | 28  | BCG      | 11/18 = 61.11% | 15/18 = 83.33% | 4/18 = 22.22% |
|      |             |                      |          | 70  | Placebo  | 7/10 = 70.00%  | 7/10 = 70.00%  | 1/10 = 10.00% |
|      |             |                      |          |     | H4:IC31  | 7/17 = 41.18%  | 9/17 = 52.94%  | 1/17 = 5.88%  |
|      |             |                      |          |     | H56:IC31 | 9/13 = 69.23%  | 10/13 = 76.92% | 1/13 = 7.69%  |
|      |             |                      |          |     | BCG      | 13/16 = 81.25% | 14/16 = 87.50% | 3/16 = 18.75% |
|      |             |                      |          | 168 | Placebo  | 6/9 = 66.67%   | 7/9 = 77.78%   | 1/9 = 11.11%  |
|      |             |                      |          |     | H4:IC31  | 10/16 = 62.50% | 13/16 = 81.25% | 4/16 = 25.00% |
|      |             |                      |          |     | H56:IC31 | 8/12 = 66.67%  | 9/12 = 75.00%  | 0/12 = 0.00%  |
|      |             |                      |          |     | BCG      | 12/13 = 92.31% | 12/13 = 92.31% | 3/13 = 23.08% |
| CD8+ | BCG-Pasteur | 2_of_3_IFNg_IL2_TNFa |          | 0   | Placebo  | 1/11 = 9.09%   | 1/11 = 9.09%   |               |
|      |             |                      |          |     | H4:IC31  | 3/23 = 13.04%  | 5/23 = 21.74%  |               |
|      |             |                      |          |     | H56:IC31 | 1/22 = 4.55%   | 2/22 = 9.09%   |               |
|      |             |                      |          |     | BCG      | 5/24 = 20.83%  | 5/24 = 20.83%  |               |
|      |             |                      |          | 14  | Placebo  | 0/10 = 0.00%   | 0/10 = 0.00%   | 0/10 = 0.00%  |

**Unreliable samples are excluded.**

**Records are excluded if the number of T-cell subsets is < 1,000**

**These criteria are applied separately to CD4+ and CD8+ subsets.**

**HVTN 602 / AERAS A-042: A randomized, placebo-controlled, partially blinded phase 1b clinical trial to evaluate the safety and immunogenicity of BCG revaccination, H4:IC31, and H56:IC31 in healthy, HIV-1-uninfected adolescent participants**

**Lab PT Report**

**Data as of February 5, 2018**

**Table 2**

**Response Rates by Fisher's Exact Test, MIMOSA, and MIMOSA2**

| Lab | Tcell | Peptide              | Cytokine | Day | Group    | Fisher        | MIMOSA        | MIMOSA2      |
|-----|-------|----------------------|----------|-----|----------|---------------|---------------|--------------|
|     |       |                      |          |     | H4:IC31  | 4/22 = 18.18% | 5/22 = 22.73% | 0/22 = 0.00% |
|     |       |                      |          |     | H56:IC31 | 2/22 = 9.09%  | 2/22 = 9.09%  | 0/22 = 0.00% |
|     |       |                      |          | 28  | BCG      | 2/20 = 10.00% | 2/20 = 10.00% | 1/20 = 5.00% |
|     |       |                      |          | 70  | Placebo  | 1/11 = 9.09%  | 1/11 = 9.09%  | 0/11 = 0.00% |
|     |       |                      |          |     | H4:IC31  | 3/20 = 15.00% | 6/20 = 30.00% | 0/20 = 0.00% |
|     |       |                      |          |     | H56:IC31 | 1/20 = 5.00%  | 1/20 = 5.00%  | 0/20 = 0.00% |
|     |       |                      |          |     | BCG      | 4/18 = 22.22% | 4/18 = 22.22% | 0/18 = 0.00% |
|     |       |                      |          | 168 | Placebo  | 0/10 = 0.00%  | 0/10 = 0.00%  | 0/10 = 0.00% |
|     |       |                      |          |     | H4:IC31  | 3/20 = 15.00% | 5/20 = 25.00% | 1/20 = 5.00% |
|     |       |                      |          |     | H56:IC31 | 1/20 = 5.00%  | 1/20 = 5.00%  | 0/20 = 0.00% |
|     |       |                      |          |     | BCG      | 0/18 = 0.00%  | 0/18 = 0.00%  | 0/18 = 0.00% |
|     | Ag85B | 2_of_3_IFNg_IL2_TNFa |          | 0   | Placebo  | 0/11 = 0.00%  | 0/11 = 0.00%  |              |
|     |       |                      |          |     | H4:IC31  | 0/24 = 0.00%  | 0/24 = 0.00%  |              |
|     |       |                      |          |     | H56:IC31 | 0/22 = 0.00%  | 0/22 = 0.00%  |              |
|     |       |                      |          |     | BCG      | 0/24 = 0.00%  | 0/24 = 0.00%  |              |
|     |       |                      |          | 14  | Placebo  | 0/11 = 0.00%  | 0/11 = 0.00%  | 0/11 = 0.00% |
|     |       |                      |          |     | H4:IC31  | 0/21 = 0.00%  | 0/21 = 0.00%  | 0/21 = 0.00% |

**Unreliable samples are excluded.**

**Records are excluded if the number of T-cell subsets is < 1,000**

**These criteria are applied separately to CD4+ and CD8+ subsets.**

**HVTN 602 / AERAS A-042: A randomized, placebo-controlled, partially blinded phase 1b clinical trial to evaluate the safety and immunogenicity of BCG revaccination, H4:IC31, and H56:IC31 in healthy, HIV-1-uninfected adolescent participants**

**Lab PT Report**

**Data as of February 5, 2018**

**Table 2**

**Response Rates by Fisher's Exact Test, MIMOSA, and MIMOSA2**

| Lab | Tcell  | Peptide              | Cytokine | Day | Group    | Fisher       | MIMOSA       | MIMOSA2      |
|-----|--------|----------------------|----------|-----|----------|--------------|--------------|--------------|
|     |        |                      |          |     | H56:IC31 | 0/23 = 0.00% | 0/23 = 0.00% | 0/23 = 0.00% |
|     |        |                      |          | 28  | BCG      | 0/20 = 0.00% | 0/20 = 0.00% | 0/20 = 0.00% |
|     |        |                      |          | 70  | Placebo  | 0/11 = 0.00% | 0/11 = 0.00% | 0/11 = 0.00% |
|     |        |                      |          |     | H4:IC31  | 0/20 = 0.00% | 0/20 = 0.00% | 0/20 = 0.00% |
|     |        |                      |          |     | H56:IC31 | 0/20 = 0.00% | 0/20 = 0.00% | 0/20 = 0.00% |
|     |        |                      |          |     | BCG      | 0/18 = 0.00% | 0/18 = 0.00% | 0/18 = 0.00% |
|     |        |                      |          | 168 | Placebo  | 0/10 = 0.00% | 0/10 = 0.00% | 0/10 = 0.00% |
|     |        |                      |          |     | H4:IC31  | 0/23 = 0.00% | 0/23 = 0.00% | 0/23 = 0.00% |
|     |        |                      |          |     | H56:IC31 | 0/21 = 0.00% | 0/21 = 0.00% | 0/21 = 0.00% |
|     |        |                      |          |     | BCG      | 0/23 = 0.00% | 0/23 = 0.00% | 0/23 = 0.00% |
|     | ESAT-6 | 2_of_3_IFNg_IL2_TNFa |          | 0   | Placebo  | 0/11 = 0.00% | 0/11 = 0.00% |              |
|     |        |                      |          |     | H4:IC31  | 0/24 = 0.00% | 0/24 = 0.00% |              |
|     |        |                      |          |     | H56:IC31 | 0/22 = 0.00% | 0/22 = 0.00% |              |
|     |        |                      |          |     | BCG      | 0/24 = 0.00% | 0/24 = 0.00% |              |
|     |        |                      |          | 14  | Placebo  | 0/11 = 0.00% | 0/11 = 0.00% | 0/11 = 0.00% |
|     |        |                      |          |     | H4:IC31  | 0/22 = 0.00% | 0/22 = 0.00% | 0/22 = 0.00% |
|     |        |                      |          |     | H56:IC31 | 0/22 = 0.00% | 0/22 = 0.00% | 0/22 = 0.00% |

**Unreliable samples are excluded.**

**Records are excluded if the number of T-cell subsets is < 1,000**

**These criteria are applied separately to CD4+ and CD8+ subsets.**

**HVTN 602 / AERAS A-042: A randomized, placebo-controlled, partially blinded phase 1b clinical trial to evaluate the safety and immunogenicity of BCG revaccination, H4:IC31, and H56:IC31 in healthy, HIV-1-uninfected adolescent participants**

**Lab PT Report**

**Data as of February 5, 2018**

**Table 2**

**Response Rates by Fisher's Exact Test, MIMOSA, and MIMOSA2**

| Lab | Tcell   | Peptide              | Cytokine | Day | Group    | Fisher       | MIMOSA       | MIMOSA2      |
|-----|---------|----------------------|----------|-----|----------|--------------|--------------|--------------|
|     |         |                      |          | 28  | BCG      | 0/20 = 0.00% | 0/20 = 0.00% | 0/20 = 0.00% |
|     |         |                      |          | 70  | Placebo  | 0/11 = 0.00% | 0/11 = 0.00% | 0/11 = 0.00% |
|     |         |                      |          |     | H4:IC31  | 0/20 = 0.00% | 0/20 = 0.00% | 0/20 = 0.00% |
|     |         |                      |          |     | H56:IC31 | 0/20 = 0.00% | 0/20 = 0.00% | 0/20 = 0.00% |
|     |         |                      |          |     | BCG      | 0/18 = 0.00% | 0/18 = 0.00% | 0/18 = 0.00% |
|     |         |                      |          | 168 | Placebo  | 0/10 = 0.00% | 0/10 = 0.00% | 0/10 = 0.00% |
|     |         |                      |          |     | H4:IC31  | 0/23 = 0.00% | 0/23 = 0.00% | 0/23 = 0.00% |
|     |         |                      |          |     | H56:IC31 | 0/21 = 0.00% | 0/21 = 0.00% | 0/21 = 0.00% |
|     |         |                      |          |     | BCG      | 0/23 = 0.00% | 0/23 = 0.00% | 0/23 = 0.00% |
|     | Rv2660c | 2_of_3_IFNg_IL2_TNFa |          | 0   | Placebo  | 0/11 = 0.00% | 0/11 = 0.00% |              |
|     |         |                      |          |     | H4:IC31  | 0/24 = 0.00% | 0/24 = 0.00% |              |
|     |         |                      |          |     | H56:IC31 | 0/22 = 0.00% | 0/22 = 0.00% |              |
|     |         |                      |          |     | BCG      | 0/24 = 0.00% | 0/24 = 0.00% |              |
|     |         |                      |          | 14  | Placebo  | 0/11 = 0.00% | 0/11 = 0.00% | 0/11 = 0.00% |
|     |         |                      |          |     | H4:IC31  | 0/22 = 0.00% | 0/22 = 0.00% | 0/22 = 0.00% |
|     |         |                      |          |     | H56:IC31 | 0/23 = 0.00% | 0/23 = 0.00% | 0/23 = 0.00% |

**Unreliable samples are excluded.**

**Records are excluded if the number of T-cell subsets is < 1,000**

**These criteria are applied separately to CD4+ and CD8+ subsets.**

**HVTN 602 / AERAS A-042: A randomized, placebo-controlled, partially blinded phase 1b clinical trial to evaluate the safety and immunogenicity of BCG revaccination, H4:IC31, and H56:IC31 in healthy, HIV-1-uninfected adolescent participants**

**Lab PT Report**

**Data as of February 5, 2018**

**Table 2**

**Response Rates by Fisher's Exact Test, MIMOSA, and MIMOSA2**

| Lab | Tcell   | Peptide              | Cytokine | Day | Group    | Fisher       | MIMOSA       | MIMOSA2      |
|-----|---------|----------------------|----------|-----|----------|--------------|--------------|--------------|
|     |         |                      |          | 28  | BCG      | 0/20 = 0.00% | 0/20 = 0.00% | 0/20 = 0.00% |
|     |         |                      |          | 70  | Placebo  | 0/11 = 0.00% | 0/11 = 0.00% | 0/11 = 0.00% |
|     |         |                      |          |     | H4:IC31  | 0/20 = 0.00% | 0/20 = 0.00% | 0/20 = 0.00% |
|     |         |                      |          |     | H56:IC31 | 0/20 = 0.00% | 0/20 = 0.00% | 0/20 = 0.00% |
|     |         |                      |          |     | BCG      | 0/18 = 0.00% | 0/18 = 0.00% | 0/18 = 0.00% |
|     |         |                      |          | 168 | Placebo  | 0/10 = 0.00% | 0/10 = 0.00% | 0/10 = 0.00% |
|     |         |                      |          |     | H4:IC31  | 0/23 = 0.00% | 0/23 = 0.00% | 0/23 = 0.00% |
|     |         |                      |          |     | H56:IC31 | 0/21 = 0.00% | 0/21 = 0.00% | 0/21 = 0.00% |
|     |         |                      |          |     | BCG      | 0/23 = 0.00% | 0/23 = 0.00% | 0/23 = 0.00% |
|     | TB 10.4 | 2_of_3_IFNg_IL2_TNFa |          | 0   | Placebo  | 0/11 = 0.00% | 0/11 = 0.00% |              |
|     |         |                      |          |     | H4:IC31  | 0/22 = 0.00% | 0/22 = 0.00% |              |
|     |         |                      |          |     | H56:IC31 | 0/20 = 0.00% | 0/20 = 0.00% |              |
|     |         |                      |          |     | BCG      | 0/23 = 0.00% | 0/23 = 0.00% |              |
|     |         |                      |          | 14  | Placebo  | 0/11 = 0.00% | 0/11 = 0.00% | 0/11 = 0.00% |
|     |         |                      |          |     | H4:IC31  | 0/22 = 0.00% | 0/22 = 0.00% | 0/22 = 0.00% |
|     |         |                      |          |     | H56:IC31 | 0/23 = 0.00% | 0/23 = 0.00% | 0/23 = 0.00% |
|     |         |                      |          | 28  | BCG      | 0/20 = 0.00% | 0/20 = 0.00% | 0/20 = 0.00% |

**Unreliable samples are excluded.**

**Records are excluded if the number of T-cell subsets is < 1,000**

**These criteria are applied separately to CD4+ and CD8+ subsets.**

**HVTN 602 / AERAS A-042: A randomized, placebo-controlled, partially blinded phase 1b clinical trial to evaluate the safety and immunogenicity of BCG revaccination, H4:IC31, and H56:IC31 in healthy, HIV-1-uninfected adolescent participants**

**Lab PT Report**

**Data as of February 5, 2018**

**Table 2**

**Response Rates by Fisher's Exact Test, MIMOSA, and MIMOSA2**

| Lab | Tcell | Peptide              | Cytokine | Day | Group    | Fisher         | MIMOSA         | MIMOSA2       |
|-----|-------|----------------------|----------|-----|----------|----------------|----------------|---------------|
|     |       |                      |          | 70  | Placebo  | 0/11 = 0.00%   | 0/11 = 0.00%   | 0/11 = 0.00%  |
|     |       |                      |          |     | H4:IC31  | 0/19 = 0.00%   | 0/19 = 0.00%   | 0/19 = 0.00%  |
|     |       |                      |          |     | H56:IC31 | 0/18 = 0.00%   | 0/18 = 0.00%   | 0/18 = 0.00%  |
|     |       |                      |          |     | BCG      | 0/17 = 0.00%   | 0/17 = 0.00%   | 0/17 = 0.00%  |
|     |       |                      |          | 168 | Placebo  | 0/10 = 0.00%   | 0/10 = 0.00%   | 0/10 = 0.00%  |
|     |       |                      |          |     | H4:IC31  | 0/23 = 0.00%   | 0/23 = 0.00%   | 0/23 = 0.00%  |
|     |       |                      |          |     | H56:IC31 | 0/21 = 0.00%   | 0/21 = 0.00%   | 0/21 = 0.00%  |
|     |       |                      |          |     | BCG      | 0/23 = 0.00%   | 0/23 = 0.00%   | 0/23 = 0.00%  |
|     | CMV   | 2_of_3_IFNg_IL2_TNFa |          | 0   | Placebo  | 9/11 = 81.82%  | 9/11 = 81.82%  |               |
|     |       |                      |          |     | H4:IC31  | 18/22 = 81.82% | 19/22 = 86.36% |               |
|     |       |                      |          |     | H56:IC31 | 15/17 = 88.24% | 17/17 = 100.0% |               |
|     |       |                      |          |     | BCG      | 18/21 = 85.71% | 19/21 = 90.48% |               |
|     |       |                      |          | 14  | Placebo  | 10/10 = 100.0% | 10/10 = 100.0% | 5/10 = 50.00% |
|     |       |                      |          |     | H4:IC31  | 16/20 = 80.00% | 18/20 = 90.00% | 5/20 = 25.00% |
|     |       |                      |          |     | H56:IC31 | 22/22 = 100.0% | 22/22 = 100.0% | 2/22 = 9.09%  |
|     |       |                      |          | 28  | BCG      | 16/18 = 88.89% | 17/18 = 94.44% | 2/18 = 11.11% |

**Unreliable samples are excluded.**

**Records are excluded if the number of T-cell subsets is < 1,000**

**These criteria are applied separately to CD4+ and CD8+ subsets.**

**HVTN 602 / AERAS A-042: A randomized, placebo-controlled, partially blinded phase 1b clinical trial to evaluate the safety and immunogenicity of BCG revaccination, H4:IC31, and H56:IC31 in healthy, HIV-1-uninfected adolescent participants**

**Lab PT Report**

**Data as of February 5, 2018**

**Table 2**

**Response Rates by Fisher's Exact Test, MIMOSA, and MIMOSA2**

| Lab | Tcell | Peptide | Cytokine | Day | Group    | Fisher         | MIMOSA         | MIMOSA2       |
|-----|-------|---------|----------|-----|----------|----------------|----------------|---------------|
|     |       |         |          | 70  | Placebo  | 10/10 = 100.0% | 10/10 = 100.0% | 2/10 = 20.00% |
|     |       |         |          |     | H4:IC31  | 13/17 = 76.47% | 15/17 = 88.24% | 2/17 = 11.76% |
|     |       |         |          |     | H56:IC31 | 12/13 = 92.31% | 12/13 = 92.31% | 1/13 = 7.69%  |
|     |       |         |          |     | BCG      | 13/16 = 81.25% | 13/16 = 81.25% | 2/16 = 12.50% |
|     |       |         |          | 168 | Placebo  | 9/ 9 = 100.0%  | 9/ 9 = 100.0%  | 5/ 9 = 55.56% |
|     |       |         |          |     | H4:IC31  | 15/16 = 93.75% | 15/16 = 93.75% | 4/16 = 25.00% |
|     |       |         |          |     | H56:IC31 | 12/12 = 100.0% | 12/12 = 100.0% | 1/12 = 8.33%  |
|     |       |         |          |     | BCG      | 10/13 = 76.92% | 12/13 = 92.31% | 2/13 = 15.38% |

**Unreliable samples are excluded.**

**Records are excluded if the number of T-cell subsets is < 1,000**

**These criteria are applied separately to CD4+ and CD8+ subsets.**



**HVTN 602 / AERAS A-042: A randomized, placebo-controlled, partially blinded phase 1b clinical trial to evaluate the safety and immunogenicity of BCG revaccination, H4:IC31, and H56:IC31 in healthy, HIV-1-uninfected adolescent participants**

**Lab PT Report**

**Data as of February 5, 2018**

**Table 3**

**Descriptive Statistics by T-cell subset, visit, and treatment arm**

| Lab | Tcell | Peptide Pool | Cytokine             | Day      | Treatment | n                    | Min    | Max     | Mean  | Median |       |        |        |
|-----|-------|--------------|----------------------|----------|-----------|----------------------|--------|---------|-------|--------|-------|--------|--------|
| CH  | CD4+  | BCG-Pasteur  | 2_of_3_IFNg_IL2_TNFa | 0        | Placebo   | 11                   | -0.008 | 0.214   | 0.041 | 0.029  |       |        |        |
|     |       |              |                      |          | H4:IC31   | 23                   | -0.060 | 0.111   | 0.014 | 0.011  |       |        |        |
|     |       |              |                      |          | H56:IC31  | 22                   | -0.071 | 0.399   | 0.055 | 0.010  |       |        |        |
|     |       |              |                      |          | BCG       | 24                   | -0.062 | 0.144   | 0.024 | 0.008  |       |        |        |
|     |       |              |                      | 14       | Placebo   | 10                   | -0.008 | 0.088   | 0.024 | 0.021  |       |        |        |
|     |       |              |                      |          | H4:IC31   | 22                   | -0.041 | 0.063   | 0.009 | 0.005  |       |        |        |
|     |       |              |                      |          | H56:IC31  | 22                   | -0.037 | 0.315   | 0.045 | 0.025  |       |        |        |
|     |       |              |                      | 28       | BCG       | 20                   | -0.056 | 0.482   | 0.085 | 0.043  |       |        |        |
|     |       |              |                      |          | 70        | Placebo              | 11     | -0.020  | 0.074 | 0.018  | 0.014 |        |        |
|     |       |              |                      |          |           | H4:IC31              | 20     | -0.047  | 0.077 | 0.016  | 0.017 |        |        |
|     |       |              |                      | H56:IC31 |           | 20                   | -0.007 | 0.367   | 0.070 | 0.045  |       |        |        |
|     |       |              |                      |          | BCG       | 18                   | -0.037 | 0.508   | 0.107 | 0.041  |       |        |        |
|     |       |              |                      | 168      | Placebo   | 10                   | -0.070 | 0.062   | 0.024 | 0.034  |       |        |        |
|     |       |              |                      |          | H4:IC31   | 20                   | -0.009 | 0.046   | 0.016 | 0.014  |       |        |        |
|     |       |              |                      |          | H56:IC31  | 20                   | -0.030 | 0.184   | 0.048 | 0.030  |       |        |        |
|     |       |              |                      |          | BCG       | 18                   | -0.039 | 0.652   | 0.099 | 0.043  |       |        |        |
|     |       |              |                      |          | Ag85B     | 2_of_3_IFNg_IL2_TNFa | 0      | Placebo | 11    | -0.028 | 0.010 | -0.007 | -0.006 |

**Unreliable samples are excluded.**

**Records are excluded if the number of T-cell subsets is < 1,000**

**These criteria are applied separately to CD4+ and CD8+ subsets.**

**HVTN 602 / AERAS A-042: A randomized, placebo-controlled, partially blinded phase 1b clinical trial to evaluate the safety and immunogenicity of BCG revaccination, H4:IC31, and H56:IC31 in healthy, HIV-1-uninfected adolescent participants**

**Lab PT Report**

Data as of February 5, 2018

**Table 3**

**Descriptive Statistics by T-cell subset, visit, and treatment arm**

| Lab | Tcell  | Peptide Pool         | Cytokine | Day | Treatment | n  | Min    | Max   | Mean   | Median |
|-----|--------|----------------------|----------|-----|-----------|----|--------|-------|--------|--------|
|     |        |                      |          |     | H4:IC31   | 24 | -0.036 | 0.033 | -0.006 | -0.006 |
|     |        |                      |          |     | H56:IC31  | 22 | -0.048 | 0.060 | -0.004 | -0.002 |
|     |        |                      |          |     | BCG       | 24 | -0.072 | 0.013 | -0.011 | -0.004 |
|     |        |                      |          | 14  | Placebo   | 11 | -0.053 | 0.017 | -0.007 | -0.005 |
|     |        |                      |          |     | H4:IC31   | 21 | -0.023 | 0.068 | 0.015  | 0.007  |
|     |        |                      |          |     | H56:IC31  | 23 | -0.035 | 0.164 | 0.030  | 0.015  |
|     |        |                      |          | 28  | BCG       | 20 | -0.043 | 0.036 | -0.003 | -0.004 |
|     |        |                      |          | 70  | Placebo   | 11 | -0.075 | 0.007 | -0.010 | -0.002 |
|     |        |                      |          |     | H4:IC31   | 20 | -0.011 | 0.430 | 0.124  | 0.064  |
|     |        |                      |          |     | H56:IC31  | 20 | 0.001  | 0.511 | 0.118  | 0.077  |
|     |        |                      |          |     | BCG       | 18 | -0.072 | 0.026 | -0.005 | -0.001 |
|     |        |                      |          | 168 | Placebo   | 10 | -0.022 | 0.009 | -0.004 | -0.002 |
|     |        |                      |          |     | H4:IC31   | 23 | -0.008 | 0.355 | 0.083  | 0.071  |
|     |        |                      |          |     | H56:IC31  | 21 | 0.008  | 0.321 | 0.064  | 0.034  |
|     |        |                      |          |     | BCG       | 23 | -0.047 | 0.124 | 0.003  | -0.005 |
|     | ESAT-6 | 2_of_3_IFNg_IL2_TNFa |          | 0   | Placebo   | 11 | -0.033 | 0.011 | -0.009 | -0.006 |
|     |        |                      |          |     | H4:IC31   | 24 | -0.128 | 0.001 | -0.017 | -0.010 |

**Unreliable samples are excluded.**

**Records are excluded if the number of T-cell subsets is < 1,000**

**These criteria are applied separately to CD4+ and CD8+ subsets.**

**HVTN 602 / AERAS A-042: A randomized, placebo-controlled, partially blinded phase 1b clinical trial to evaluate the safety and immunogenicity of BCG revaccination, H4:IC31, and H56:IC31 in healthy, HIV-1-uninfected adolescent participants**

**Lab PT Report**

**Data as of February 5, 2018**

**Table 3**

**Descriptive Statistics by T-cell subset, visit, and treatment arm**

| Lab | Tcell   | Peptide Pool         | Cytokine | Day | Treatment | n  | Min    | Max   | Mean   | Median |
|-----|---------|----------------------|----------|-----|-----------|----|--------|-------|--------|--------|
|     |         |                      |          |     | H56:IC31  | 22 | -0.077 | 0.034 | -0.012 | -0.008 |
|     |         |                      |          |     | BCG       | 24 | -0.100 | 0.007 | -0.018 | -0.008 |
|     |         |                      |          | 14  | Placebo   | 11 | -0.041 | 0.001 | -0.010 | -0.002 |
|     |         |                      |          |     | H4:IC31   | 22 | -0.045 | 0.004 | -0.018 | -0.018 |
|     |         |                      |          |     | H56:IC31  | 22 | -0.060 | 0.087 | -0.001 | 0.001  |
|     |         |                      |          | 28  | BCG       | 20 | -0.063 | 0.008 | -0.014 | -0.006 |
|     |         |                      |          | 70  | Placebo   | 11 | -0.088 | 0.011 | -0.013 | -0.003 |
|     |         |                      |          |     | H4:IC31   | 20 | -0.067 | 0.029 | -0.014 | -0.012 |
|     |         |                      |          |     | H56:IC31  | 20 | -0.029 | 0.086 | 0.025  | 0.016  |
|     |         |                      |          |     | BCG       | 18 | -0.057 | 0.013 | -0.012 | -0.007 |
|     |         |                      |          | 168 | Placebo   | 10 | -0.050 | 0.006 | -0.007 | -0.002 |
|     |         |                      |          |     | H4:IC31   | 23 | -0.048 | 0.068 | -0.008 | -0.008 |
|     |         |                      |          |     | H56:IC31  | 21 | -0.030 | 0.079 | 0.006  | 0.001  |
|     |         |                      |          |     | BCG       | 23 | -0.060 | 0.006 | -0.012 | -0.009 |
|     | Rv2660c | 2_of_3_IFNg_IL2_TNFa |          | 0   | Placebo   | 11 | -0.039 | 0.007 | -0.015 | -0.016 |
|     |         |                      |          |     | H4:IC31   | 24 | -0.121 | 0.004 | -0.015 | -0.008 |
|     |         |                      |          |     | H56:IC31  | 22 | -0.065 | 0.029 | -0.015 | -0.012 |

**Unreliable samples are excluded.**

**Records are excluded if the number of T-cell subsets is < 1,000**

**These criteria are applied separately to CD4+ and CD8+ subsets.**

**HVTN 602 / AERAS A-042: A randomized, placebo-controlled, partially blinded phase 1b clinical trial to evaluate the safety and immunogenicity of BCG revaccination, H4:IC31, and H56:IC31 in healthy, HIV-1-uninfected adolescent participants**

**Lab PT Report**

Data as of February 5, 2018

**Table 3**

**Descriptive Statistics by T-cell subset, visit, and treatment arm**

| Lab | Tcell   | Peptide Pool | Cytokine             | Day | Treatment | n  | Min    | Max   | Mean   | Median |
|-----|---------|--------------|----------------------|-----|-----------|----|--------|-------|--------|--------|
|     |         |              |                      |     | BCG       | 24 | -0.098 | 0.005 | -0.021 | -0.007 |
|     |         |              |                      | 14  | Placebo   | 11 | -0.052 | 0.006 | -0.010 | -0.007 |
|     |         |              |                      |     | H4:IC31   | 22 | -0.061 | 0.004 | -0.019 | -0.014 |
|     |         |              |                      |     | H56:IC31  | 23 | -0.126 | 0.020 | -0.018 | -0.008 |
|     |         |              |                      | 28  | BCG       | 20 | -0.069 | 0.014 | -0.015 | -0.007 |
|     |         |              |                      | 70  | Placebo   | 11 | -0.068 | 0.003 | -0.012 | -0.002 |
|     |         |              |                      |     | H4:IC31   | 20 | -0.046 | 0.008 | -0.016 | -0.013 |
|     |         |              |                      |     | H56:IC31  | 20 | -0.048 | 0.019 | -0.003 | 0.001  |
|     |         |              |                      |     | BCG       | 18 | -0.059 | 0.008 | -0.014 | -0.010 |
|     |         |              |                      | 168 | Placebo   | 10 | -0.028 | 0.001 | -0.007 | -0.006 |
|     |         |              |                      |     | H4:IC31   | 23 | -0.041 | 0.009 | -0.010 | -0.007 |
|     |         |              |                      |     | H56:IC31  | 21 | -0.061 | 0.005 | -0.011 | -0.008 |
|     |         |              |                      |     | BCG       | 23 | -0.057 | 0.003 | -0.017 | -0.016 |
|     | TB 10.4 |              | 2_of_3_IFNg_IL2_TNFa | 0   | Placebo   | 11 | -0.032 | 0.038 | 0.002  | 0.002  |
|     |         |              |                      |     | H4:IC31   | 22 | -0.153 | 0.006 | -0.015 | -0.007 |
|     |         |              |                      |     | H56:IC31  | 20 | -0.064 | 0.170 | 0.012  | -0.002 |
|     |         |              |                      |     | BCG       | 23 | -0.096 | 0.129 | -0.009 | -0.005 |

**Unreliable samples are excluded.**

**Records are excluded if the number of T-cell subsets is < 1,000**

**These criteria are applied separately to CD4+ and CD8+ subsets.**

**HVTN 602 / AERAS A-042: A randomized, placebo-controlled, partially blinded phase 1b clinical trial to evaluate the safety and immunogenicity of BCG revaccination, H4:IC31, and H56:IC31 in healthy, HIV-1-uninfected adolescent participants**

**Lab PT Report**

**Data as of February 5, 2018**

**Table 3**

**Descriptive Statistics by T-cell subset, visit, and treatment arm**

| Lab | Tcell | Peptide Pool | Cytokine             | Day | Treatment | n  | Min    | Max   | Mean   | Median |
|-----|-------|--------------|----------------------|-----|-----------|----|--------|-------|--------|--------|
|     |       |              |                      | 14  | Placebo   | 11 | -0.052 | 0.016 | -0.006 | -0.005 |
|     |       |              |                      |     | H4:IC31   | 22 | -0.035 | 0.078 | 0.002  | -0.002 |
|     |       |              |                      |     | H56:IC31  | 23 | -0.108 | 0.194 | 0.004  | 0.004  |
|     |       |              |                      | 28  | BCG       | 20 | -0.049 | 0.240 | 0.033  | 0.016  |
|     |       |              |                      | 70  | Placebo   | 11 | -0.045 | 0.043 | -0.003 | -0.004 |
|     |       |              |                      |     | H4:IC31   | 19 | -0.048 | 0.184 | 0.057  | 0.035  |
|     |       |              |                      |     | H56:IC31  | 18 | -0.022 | 0.068 | 0.013  | 0.003  |
|     |       |              |                      |     | BCG       | 17 | -0.046 | 0.183 | 0.023  | 0.015  |
|     |       |              |                      | 168 | Placebo   | 10 | -0.040 | 0.031 | -0.001 | -0.001 |
|     |       |              |                      |     | H4:IC31   | 23 | -0.047 | 0.240 | 0.040  | 0.023  |
|     |       |              |                      |     | H56:IC31  | 21 | -0.039 | 0.164 | 0.013  | 0.002  |
|     |       |              |                      |     | BCG       | 23 | -0.033 | 0.182 | 0.020  | 0.003  |
|     | CMV   |              | 2_of_3_IFNg_IL2_TNFa | 0   | Placebo   | 11 | 0.022  | 0.786 | 0.191  | 0.127  |
|     |       |              |                      |     | H4:IC31   | 22 | -0.080 | 0.506 | 0.075  | 0.049  |
|     |       |              |                      |     | H56:IC31  | 17 | 0.007  | 0.357 | 0.096  | 0.051  |
|     |       |              |                      |     | BCG       | 21 | -0.006 | 3.595 | 0.369  | 0.126  |

**Unreliable samples are excluded.**

**Records are excluded if the number of T-cell subsets is < 1,000**

**These criteria are applied separately to CD4+ and CD8+ subsets.**

**HVTN 602 / AERAS A-042: A randomized, placebo-controlled, partially blinded phase 1b clinical trial to evaluate the safety and immunogenicity of BCG revaccination, H4:IC31, and H56:IC31 in healthy, HIV-1-uninfected adolescent participants**

**Lab PT Report**

**Data as of February 5, 2018**

**Table 3**

**Descriptive Statistics by T-cell subset, visit, and treatment arm**

| Lab  | Tcell       | Peptide Pool         | Cytokine | Day | Treatment | n  | Min    | Max   | Mean  | Median |
|------|-------------|----------------------|----------|-----|-----------|----|--------|-------|-------|--------|
|      |             |                      |          | 14  | Placebo   | 10 | 0.010  | 0.511 | 0.119 | 0.094  |
|      |             |                      |          |     | H4:IC31   | 20 | -0.018 | 0.719 | 0.142 | 0.080  |
|      |             |                      |          |     | H56:IC31  | 22 | -0.050 | 0.401 | 0.095 | 0.077  |
|      |             |                      |          | 28  | BCG       | 18 | 0.008  | 5.139 | 0.444 | 0.073  |
|      |             |                      |          | 70  | Placebo   | 10 | 0.023  | 0.463 | 0.174 | 0.106  |
|      |             |                      |          |     | H4:IC31   | 17 | -0.011 | 0.492 | 0.082 | 0.048  |
|      |             |                      |          |     | H56:IC31  | 13 | 0.020  | 0.441 | 0.113 | 0.055  |
|      |             |                      |          |     | BCG       | 16 | -0.004 | 1.493 | 0.244 | 0.097  |
|      |             |                      |          | 168 | Placebo   | 9  | 0.025  | 0.884 | 0.206 | 0.078  |
|      |             |                      |          |     | H4:IC31   | 16 | 0.011  | 0.710 | 0.166 | 0.097  |
|      |             |                      |          |     | H56:IC31  | 12 | 0.013  | 0.689 | 0.151 | 0.074  |
|      |             |                      |          |     | BCG       | 13 | 0.038  | 0.552 | 0.201 | 0.149  |
| CD8+ | BCG-Pasteur | 2_of_3_IFNg_IL2_TNFa |          | 0   | Placebo   | 11 | -0.007 | 0.033 | 0.010 | 0.009  |
|      |             |                      |          |     | H4:IC31   | 23 | -0.048 | 0.056 | 0.013 | 0.010  |
|      |             |                      |          |     | H56:IC31  | 22 | -0.019 | 0.138 | 0.012 | 0.007  |
|      |             |                      |          |     | BCG       | 24 | -0.024 | 0.134 | 0.016 | 0.002  |
|      |             |                      |          | 14  | Placebo   | 10 | -0.004 | 0.004 | 0.001 | 0.002  |

**Unreliable samples are excluded.**

**Records are excluded if the number of T-cell subsets is < 1,000**

**These criteria are applied separately to CD4+ and CD8+ subsets.**

**HVTN 602 / AERAS A-042: A randomized, placebo-controlled, partially blinded phase 1b clinical trial to evaluate the safety and immunogenicity of BCG revaccination, H4:IC31, and H56:IC31 in healthy, HIV-1-uninfected adolescent participants**

**Lab PT Report**

**Data as of February 5, 2018**

**Table 3**

**Descriptive Statistics by T-cell subset, visit, and treatment arm**

| Lab | Tcell | Peptide Pool         | Cytokine | Day | Treatment | n  | Min    | Max   | Mean   | Median |
|-----|-------|----------------------|----------|-----|-----------|----|--------|-------|--------|--------|
|     |       |                      |          |     | H4:IC31   | 22 | -0.005 | 0.128 | 0.022  | 0.003  |
|     |       |                      |          |     | H56:IC31  | 22 | -0.006 | 0.108 | 0.011  | 0.004  |
|     |       |                      |          | 28  | BCG       | 20 | -0.014 | 0.063 | 0.014  | 0.012  |
|     |       |                      |          | 70  | Placebo   | 11 | -0.004 | 0.029 | 0.008  | 0.006  |
|     |       |                      |          |     | H4:IC31   | 20 | -0.009 | 0.084 | 0.018  | 0.009  |
|     |       |                      |          |     | H56:IC31  | 20 | -0.034 | 0.116 | 0.010  | 0.004  |
|     |       |                      |          |     | BCG       | 18 | -0.002 | 0.070 | 0.017  | 0.012  |
|     |       |                      |          | 168 | Placebo   | 10 | -0.007 | 0.008 | 0.000  | 0.000  |
|     |       |                      |          |     | H4:IC31   | 20 | -0.007 | 0.073 | 0.019  | 0.009  |
|     |       |                      |          |     | H56:IC31  | 20 | -0.008 | 0.058 | 0.008  | 0.005  |
|     |       |                      |          |     | BCG       | 18 | -0.014 | 0.042 | 0.007  | 0.002  |
|     | Ag85B | 2_of_3_IFNg_IL2_TNFa |          | 0   | Placebo   | 11 | -0.003 | 0.009 | 0.001  | 0.000  |
|     |       |                      |          |     | H4:IC31   | 24 | -0.035 | 0.007 | -0.002 | 0.000  |
|     |       |                      |          |     | H56:IC31  | 22 | -0.012 | 0.019 | -0.002 | -0.003 |
|     |       |                      |          |     | BCG       | 24 | -0.012 | 0.008 | -0.003 | -0.003 |
|     |       |                      |          | 14  | Placebo   | 11 | -0.007 | 0.020 | 0.001  | 0.001  |
|     |       |                      |          |     | H4:IC31   | 21 | -0.010 | 0.007 | -0.001 | -0.000 |

**Unreliable samples are excluded.**

**Records are excluded if the number of T-cell subsets is < 1,000**

**These criteria are applied separately to CD4+ and CD8+ subsets.**

**HVTN 602 / AERAS A-042: A randomized, placebo-controlled, partially blinded phase 1b clinical trial to evaluate the safety and immunogenicity of BCG revaccination, H4:IC31, and H56:IC31 in healthy, HIV-1-uninfected adolescent participants**

**Lab PT Report**

**Data as of February 5, 2018**

**Table 3**

**Descriptive Statistics by T-cell subset, visit, and treatment arm**

| Lab | Tcell  | Peptide Pool         | Cytokine | Day | Treatment | n  | Min    | Max   | Mean   | Median |
|-----|--------|----------------------|----------|-----|-----------|----|--------|-------|--------|--------|
|     |        |                      |          |     | H56:IC31  | 23 | -0.023 | 0.009 | -0.000 | 0.000  |
|     |        |                      |          | 28  | BCG       | 20 | -0.008 | 0.024 | 0.001  | -0.000 |
|     |        |                      |          | 70  | Placebo   | 11 | -0.005 | 0.004 | -0.000 | 0.000  |
|     |        |                      |          |     | H4:IC31   | 20 | -0.010 | 0.012 | -0.001 | -0.001 |
|     |        |                      |          |     | H56:IC31  | 20 | -0.016 | 0.007 | -0.002 | -0.001 |
|     |        |                      |          |     | BCG       | 18 | -0.007 | 0.003 | -0.001 | 0.000  |
|     |        |                      |          | 168 | Placebo   | 10 | -0.006 | 0.003 | -0.000 | 0.000  |
|     |        |                      |          |     | H4:IC31   | 23 | -0.042 | 0.006 | -0.003 | -0.000 |
|     |        |                      |          |     | H56:IC31  | 21 | -0.008 | 0.008 | 0.000  | 0.000  |
|     |        |                      |          |     | BCG       | 23 | -0.011 | 0.015 | -0.001 | -0.001 |
|     | ESAT-6 | 2_of_3_IFNg_IL2_TNFa |          | 0   | Placebo   | 11 | -0.004 | 0.003 | 0.000  | -0.000 |
|     |        |                      |          |     | H4:IC31   | 24 | -0.047 | 0.006 | -0.003 | -0.001 |
|     |        |                      |          |     | H56:IC31  | 22 | -0.019 | 0.005 | -0.003 | -0.001 |
|     |        |                      |          |     | BCG       | 24 | -0.021 | 0.001 | -0.004 | -0.003 |
|     |        |                      |          | 14  | Placebo   | 11 | -0.006 | 0.007 | -0.001 | -0.000 |
|     |        |                      |          |     | H4:IC31   | 22 | -0.007 | 0.003 | -0.002 | -0.002 |
|     |        |                      |          |     | H56:IC31  | 22 | -0.031 | 0.006 | -0.002 | -0.000 |

**Unreliable samples are excluded.**

**Records are excluded if the number of T-cell subsets is < 1,000**

**These criteria are applied separately to CD4+ and CD8+ subsets.**



**HVTN 602 / AERAS A-042: A randomized, placebo-controlled, partially blinded phase 1b clinical trial to evaluate the safety and immunogenicity of BCG revaccination, H4:IC31, and H56:IC31 in healthy, HIV-1-uninfected adolescent participants**

**Lab PT Report**

**Data as of February 5, 2018**

**Table 3**

**Descriptive Statistics by T-cell subset, visit, and treatment arm**

| Lab | Tcell   | Peptide Pool         | Cytokine | Day | Treatment | n  | Min    | Max   | Mean   | Median |
|-----|---------|----------------------|----------|-----|-----------|----|--------|-------|--------|--------|
|     |         |                      |          | 28  | BCG       | 20 | -0.012 | 0.011 | -0.000 | -0.000 |
|     |         |                      |          | 70  | Placebo   | 11 | -0.005 | 0.006 | 0.001  | 0.001  |
|     |         |                      |          |     | H4:IC31   | 20 | -0.005 | 0.006 | -0.001 | -0.002 |
|     |         |                      |          |     | H56:IC31  | 20 | -0.037 | 0.003 | -0.004 | -0.000 |
|     |         |                      |          |     | BCG       | 18 | -0.011 | 0.008 | -0.001 | -0.001 |
|     |         |                      |          | 168 | Placebo   | 10 | -0.003 | 0.003 | 0.000  | 0.000  |
|     |         |                      |          |     | H4:IC31   | 23 | -0.095 | 0.005 | -0.006 | -0.002 |
|     |         |                      |          |     | H56:IC31  | 21 | -0.008 | 0.011 | 0.001  | 0.000  |
|     |         |                      |          |     | BCG       | 23 | -0.017 | 0.008 | -0.001 | -0.000 |
|     | Rv2660c | 2_of_3_IFNg_IL2_TNFa |          | 0   | Placebo   | 11 | -0.008 | 0.004 | -0.002 | -0.000 |
|     |         |                      |          |     | H4:IC31   | 24 | -0.055 | 0.007 | -0.004 | -0.001 |
|     |         |                      |          |     | H56:IC31  | 22 | -0.015 | 0.005 | -0.002 | -0.001 |
|     |         |                      |          |     | BCG       | 24 | -0.017 | 0.003 | -0.004 | -0.003 |
|     |         |                      |          | 14  | Placebo   | 11 | -0.007 | 0.008 | -0.001 | 0.000  |
|     |         |                      |          |     | H4:IC31   | 22 | -0.009 | 0.003 | -0.003 | -0.003 |
|     |         |                      |          |     | H56:IC31  | 23 | -0.031 | 0.008 | -0.003 | -0.000 |

**Unreliable samples are excluded.**

**Records are excluded if the number of T-cell subsets is < 1,000**

**These criteria are applied separately to CD4+ and CD8+ subsets.**

**HVTN 602 / AERAS A-042: A randomized, placebo-controlled, partially blinded phase 1b clinical trial to evaluate the safety and immunogenicity of BCG revaccination, H4:IC31, and H56:IC31 in healthy, HIV-1-uninfected adolescent participants**

**Lab PT Report**

**Data as of February 5, 2018**

**Table 3**

**Descriptive Statistics by T-cell subset, visit, and treatment arm**

| Lab | Tcell   | Peptide Pool         | Cytokine | Day | Treatment | n  | Min    | Max   | Mean   | Median |
|-----|---------|----------------------|----------|-----|-----------|----|--------|-------|--------|--------|
|     |         |                      |          | 28  | BCG       | 20 | -0.011 | 0.008 | -0.000 | -0.000 |
|     |         |                      |          | 70  | Placebo   | 11 | -0.005 | 0.007 | -0.000 | -0.001 |
|     |         |                      |          |     | H4:IC31   | 20 | -0.011 | 0.003 | -0.002 | -0.000 |
|     |         |                      |          |     | H56:IC31  | 20 | -0.013 | 0.003 | -0.002 | -0.001 |
|     |         |                      |          |     | BCG       | 18 | -0.011 | 0.006 | -0.001 | 0.000  |
|     |         |                      |          | 168 | Placebo   | 10 | -0.004 | 0.005 | 0.000  | 0.000  |
|     |         |                      |          |     | H4:IC31   | 23 | -0.064 | 0.013 | -0.003 | -0.000 |
|     |         |                      |          |     | H56:IC31  | 21 | -0.008 | 0.012 | -0.000 | 0.000  |
|     |         |                      |          |     | BCG       | 23 | -0.009 | 0.006 | -0.001 | -0.000 |
|     | TB 10.4 | 2_of_3_IFNg_IL2_TNFa |          | 0   | Placebo   | 11 | -0.010 | 0.004 | -0.001 | 0.000  |
|     |         |                      |          |     | H4:IC31   | 22 | -0.060 | 0.004 | -0.005 | -0.002 |
|     |         |                      |          |     | H56:IC31  | 20 | -0.019 | 0.007 | -0.003 | -0.002 |
|     |         |                      |          |     | BCG       | 23 | -0.016 | 0.017 | -0.003 | -0.002 |
|     |         |                      |          | 14  | Placebo   | 11 | -0.006 | 0.007 | -0.002 | -0.003 |
|     |         |                      |          |     | H4:IC31   | 22 | -0.010 | 0.005 | -0.002 | -0.001 |
|     |         |                      |          |     | H56:IC31  | 23 | -0.031 | 0.004 | -0.003 | -0.000 |
|     |         |                      |          | 28  | BCG       | 20 | -0.012 | 0.007 | -0.001 | -0.000 |

**Unreliable samples are excluded.**

**Records are excluded if the number of T-cell subsets is < 1,000**

**These criteria are applied separately to CD4+ and CD8+ subsets.**

**HVTN 602 / AERAS A-042: A randomized, placebo-controlled, partially blinded phase 1b clinical trial to evaluate the safety and immunogenicity of BCG revaccination, H4:IC31, and H56:IC31 in healthy, HIV-1-uninfected adolescent participants**

**Lab PT Report**

**Data as of February 5, 2018**

**Table 3**

**Descriptive Statistics by T-cell subset, visit, and treatment arm**

| Lab | Tcell | Peptide Pool         | Cytokine | Day | Treatment | n  | Min    | Max   | Mean   | Median |
|-----|-------|----------------------|----------|-----|-----------|----|--------|-------|--------|--------|
|     |       |                      |          | 70  | Placebo   | 11 | -0.005 | 0.003 | -0.002 | -0.001 |
|     |       |                      |          |     | H4:IC31   | 19 | -0.012 | 0.008 | -0.003 | -0.003 |
|     |       |                      |          |     | H56:IC31  | 18 | -0.018 | 0.001 | -0.003 | -0.000 |
|     |       |                      |          |     | BCG       | 17 | -0.008 | 0.005 | -0.001 | -0.001 |
|     |       |                      |          | 168 | Placebo   | 10 | -0.006 | 0.004 | -0.000 | 0.000  |
|     |       |                      |          |     | H4:IC31   | 23 | -0.072 | 0.008 | -0.004 | -0.001 |
|     |       |                      |          |     | H56:IC31  | 21 | -0.008 | 0.009 | -0.000 | 0.000  |
|     |       |                      |          |     | BCG       | 23 | -0.014 | 0.010 | -0.001 | 0.000  |
|     | CMV   | 2_of_3_IFNg_IL2_TNFa |          | 0   | Placebo   | 11 | -0.000 | 3.996 | 1.567  | 1.364  |
|     |       |                      |          |     | H4:IC31   | 22 | -0.005 | 2.503 | 0.596  | 0.344  |
|     |       |                      |          |     | H56:IC31  | 17 | 0.050  | 2.498 | 0.875  | 0.624  |
|     |       |                      |          |     | BCG       | 21 | -0.007 | 4.488 | 1.390  | 0.953  |
|     |       |                      |          | 14  | Placebo   | 10 | 0.036  | 3.490 | 1.561  | 1.199  |
|     |       |                      |          |     | H4:IC31   | 20 | 0.006  | 2.583 | 0.670  | 0.405  |
|     |       |                      |          |     | H56:IC31  | 22 | 0.091  | 3.729 | 1.271  | 0.812  |
|     |       |                      |          | 28  | BCG       | 18 | 0.013  | 3.394 | 1.001  | 0.806  |

**Unreliable samples are excluded.**

**Records are excluded if the number of T-cell subsets is < 1,000**

**These criteria are applied separately to CD4+ and CD8+ subsets.**

**HVTN 602 / AERAS A-042: A randomized, placebo-controlled, partially blinded phase 1b clinical trial to evaluate the safety and immunogenicity of BCG revaccination, H4:IC31, and H56:IC31 in healthy, HIV-1-uninfected adolescent participants**

**Lab PT Report**

**Data as of February 5, 2018**

**Table 3**

**Descriptive Statistics by T-cell subset, visit, and treatment arm**

| Lab | Tcell | Peptide Pool | Cytokine | Day | Treatment | n  | Min   | Max   | Mean  | Median |
|-----|-------|--------------|----------|-----|-----------|----|-------|-------|-------|--------|
|     |       |              |          | 70  | Placebo   | 10 | 0.032 | 4.111 | 1.749 | 1.324  |
|     |       |              |          |     | H4:IC31   | 17 | 0.003 | 2.410 | 0.613 | 0.352  |
|     |       |              |          |     | H56:IC31  | 13 | 0.023 | 3.881 | 1.156 | 0.713  |
|     |       |              |          |     | BCG       | 16 | 0.003 | 3.372 | 1.241 | 0.831  |
|     |       |              |          | 168 | Placebo   | 9  | 0.681 | 3.149 | 1.944 | 1.740  |
|     |       |              |          |     | H4:IC31   | 16 | 0.013 | 3.823 | 0.959 | 0.490  |
|     |       |              |          |     | H56:IC31  | 12 | 0.070 | 5.171 | 1.462 | 0.730  |
|     |       |              |          |     | BCG       | 13 | 0.022 | 4.464 | 1.037 | 0.668  |

**Unreliable samples are excluded.**

**Records are excluded if the number of T-cell subsets is < 1,000**

**These criteria are applied separately to CD4+ and CD8+ subsets.**

**HVTN 602 / AERAS A-042: A randomized, placebo-controlled, partially blinded phase 1b clinical trial to evaluate the safety and immunogenicity of BCG revaccination, H4:IC31, and H56:IC31 in healthy, HIV-1-uninfected adolescent participants**

**Lab PT Report**

**Data as of February 5, 2018**

**Table 4**

**Listing of Positive ICS Responses Using MIMOSA**

| <i>Lab</i> | <i>Group</i> | <i>Pub ID</i> | <i>T cell</i> | <i>Day</i> | <i>Peptide Pool</i> | <i>Cytokine</i>      | <i>%<br/>Cytokine<br/>Response</i> | <i>%<br/>Response<br/>Neg Ctrl</i> | <i>%<br/>Response<br/>Bkgd Adj</i> |
|------------|--------------|---------------|---------------|------------|---------------------|----------------------|------------------------------------|------------------------------------|------------------------------------|
| CH         | BCG          | 042002        | CD4+          | 28         | BCG-Pasteur         | 2_of_3_IFNg_IL2_TNFa | 0.137                              | 0.033                              | 0.104                              |
|            |              |               |               | 168        | BCG-Pasteur         | 2_of_3_IFNg_IL2_TNFa | 0.124                              | 0.044                              | 0.079                              |
|            |              |               | CD8+          | 0          | BCG-Pasteur         | 2_of_3_IFNg_IL2_TNFa | 0.136                              | 0.002                              | 0.134                              |
|            |              |               |               | 28         | BCG-Pasteur         | 2_of_3_IFNg_IL2_TNFa | 0.049                              | 0.004                              | 0.045                              |
|            |              |               |               | 70         | BCG-Pasteur         | 2_of_3_IFNg_IL2_TNFa | 0.039                              | 0.000                              | 0.039                              |
|            |              | 042005        | CD4+          | 28         | BCG-Pasteur         | 2_of_3_IFNg_IL2_TNFa | 0.063                              | 0.028                              | 0.035                              |
|            |              |               | CD8+          | 0          | BCG-Pasteur         | 2_of_3_IFNg_IL2_TNFa | 0.075                              | 0.012                              | 0.063                              |
|            |              |               |               | 70         | BCG-Pasteur         | 2_of_3_IFNg_IL2_TNFa | 0.075                              | 0.005                              | 0.070                              |
|            |              | 042016        | CD4+          | 70         | BCG-Pasteur         | 2_of_3_IFNg_IL2_TNFa | 0.045                              | 0.008                              | 0.038                              |
|            |              |               | CD8+          | 0          | BCG-Pasteur         | 2_of_3_IFNg_IL2_TNFa | 0.042                              | 0.001                              | 0.040                              |
|            |              |               |               | 70         | BCG-Pasteur         | 2_of_3_IFNg_IL2_TNFa | 0.038                              | 0.001                              | 0.037                              |
|            |              | 042022        | CD4+          | 0          | BCG-Pasteur         | 2_of_3_IFNg_IL2_TNFa | 0.110                              | 0.048                              | 0.062                              |
|            |              |               |               | 28         | BCG-Pasteur         | 2_of_3_IFNg_IL2_TNFa | 0.212                              | 0.025                              | 0.187                              |
|            |              |               |               | 168        | BCG-Pasteur         | 2_of_3_IFNg_IL2_TNFa | 0.134                              | 0.026                              | 0.108                              |
|            |              | 042026        | CD4+          | 28         | BCG-Pasteur         | 2_of_3_IFNg_IL2_TNFa | 0.125                              | 0.014                              | 0.111                              |
|            |              |               |               | 70         | BCG-Pasteur         | 2_of_3_IFNg_IL2_TNFa | 0.050                              | 0.006                              | 0.044                              |
|            |              | 042027        | CD4+          | 168        | BCG-Pasteur         | 2_of_3_IFNg_IL2_TNFa | 0.690                              | 0.038                              | 0.652                              |
|            |              | 042030        | CD4+          | 28         | BCG-Pasteur         | 2_of_3_IFNg_IL2_TNFa | 0.110                              | 0.028                              | 0.081                              |
|            |              | 042031        | CD8+          | 0          | BCG-Pasteur         | 2_of_3_IFNg_IL2_TNFa | 0.033                              | 0.000                              | 0.033                              |
|            |              | 042035        | CD4+          | 70         | BCG-Pasteur         | 2_of_3_IFNg_IL2_TNFa | 0.120                              | 0.035                              | 0.085                              |
|            |              |               | CD8+          | 28         | BCG-Pasteur         | 2_of_3_IFNg_IL2_TNFa | 0.077                              | 0.014                              | 0.063                              |

**Unreliable samples are excluded.**

**Records are excluded if the number of T-cell subsets is < 1,000**

**These criteria are applied separately to CD4+ and CD8+ subsets.**

**HVTN 602 / AERAS A-042: A randomized, placebo-controlled, partially blinded phase 1b clinical trial to evaluate the safety and immunogenicity of BCG revaccination, H4:IC31, and H56:IC31 in healthy, HIV-1-uninfected adolescent participants**

**Lab PT Report**

**Data as of February 5, 2018**

**Table 4**

**Listing of Positive ICS Responses Using MIMOSA**

| <i>Lab</i> | <i>Group</i> | <i>Pub ID</i> | <i>T cell</i> | <i>Day</i> | <i>Peptide Pool</i> | <i>Cytokine</i>      | <i>%<br/>Cytokine<br/>Response</i> | <i>%<br/>Response<br/>Neg Ctrl</i> | <i>%<br/>Response<br/>Bkgd Adj</i> |
|------------|--------------|---------------|---------------|------------|---------------------|----------------------|------------------------------------|------------------------------------|------------------------------------|
|            |              | 042038        | CD4+          | 28         | BCG-Pasteur         | 2_of_3_IFNg_IL2_TNFa | 0.167                              | 0.046                              | 0.120                              |
|            |              |               |               | 70         | BCG-Pasteur         | 2_of_3_IFNg_IL2_TNFa | 0.127                              | 0.027                              | 0.100                              |
|            |              | 042043        | CD4+          | 0          | BCG-Pasteur         | 2_of_3_IFNg_IL2_TNFa | 0.166                              | 0.022                              | 0.144                              |
|            |              |               |               | 70         | BCG-Pasteur         | 2_of_3_IFNg_IL2_TNFa | 0.387                              | 0.016                              | 0.371                              |
|            |              |               |               | 168        | BCG-Pasteur         | 2_of_3_IFNg_IL2_TNFa | 0.353                              | 0.026                              | 0.327                              |
|            |              | 042053        | CD4+          | 0          | BCG-Pasteur         | 2_of_3_IFNg_IL2_TNFa | 0.159                              | 0.016                              | 0.144                              |
|            |              |               |               | 28         | BCG-Pasteur         | 2_of_3_IFNg_IL2_TNFa | 0.531                              | 0.048                              | 0.482                              |
|            |              |               |               | 70         | BCG-Pasteur         | 2_of_3_IFNg_IL2_TNFa | 0.526                              | 0.018                              | 0.508                              |
|            |              |               |               | 168        | BCG-Pasteur         | 2_of_3_IFNg_IL2_TNFa | 0.301                              | 0.056                              | 0.246                              |
|            |              | 042058        | CD4+          | 70         | BCG-Pasteur         | 2_of_3_IFNg_IL2_TNFa | 0.076                              | 0.018                              | 0.057                              |
|            |              | 042063        | CD4+          | 28         | BCG-Pasteur         | 2_of_3_IFNg_IL2_TNFa | 0.138                              | 0.043                              | 0.095                              |
|            |              |               |               | 70         | BCG-Pasteur         | 2_of_3_IFNg_IL2_TNFa | 0.285                              | 0.052                              | 0.232                              |
|            |              |               | CD8+          | 0          | BCG-Pasteur         | 2_of_3_IFNg_IL2_TNFa | 0.050                              | 0.006                              | 0.043                              |
|            |              |               |               | 70         | BCG-Pasteur         | 2_of_3_IFNg_IL2_TNFa | 0.044                              | 0.005                              | 0.039                              |
|            |              | 042065        | CD4+          | 0          | BCG-Pasteur         | 2_of_3_IFNg_IL2_TNFa | 0.044                              | 0.009                              | 0.035                              |
|            |              |               |               | 28         | BCG-Pasteur         | 2_of_3_IFNg_IL2_TNFa | 0.119                              | 0.019                              | 0.100                              |
|            |              |               |               | 168        | BCG-Pasteur         | 2_of_3_IFNg_IL2_TNFa | 0.074                              | 0.005                              | 0.070                              |
|            |              | 042066        | CD4+          | 28         | BCG-Pasteur         | 2_of_3_IFNg_IL2_TNFa | 0.292                              | 0.026                              | 0.266                              |
|            |              |               |               | 70         | BCG-Pasteur         | 2_of_3_IFNg_IL2_TNFa | 0.246                              | 0.060                              | 0.186                              |
|            |              | 042077        | CD4+          | 0          | BCG-Pasteur         | 2_of_3_IFNg_IL2_TNFa | 0.199                              | 0.062                              | 0.137                              |
|            |              |               |               | 70         | BCG-Pasteur         | 2_of_3_IFNg_IL2_TNFa | 0.323                              | 0.124                              | 0.199                              |

**Unreliable samples are excluded.**

**Records are excluded if the number of T-cell subsets is < 1,000**

**These criteria are applied separately to CD4+ and CD8+ subsets.**

**HVTN 602 / AERAS A-042: A randomized, placebo-controlled, partially blinded phase 1b clinical trial to evaluate the safety and immunogenicity of BCG revaccination, H4:IC31, and H56:IC31 in healthy, HIV-1-uninfected adolescent participants**

**Lab PT Report**

**Data as of February 5, 2018**

**Table 4**

**Listing of Positive ICS Responses Using MIMOSA**

| <i>Lab</i> | <i>Group</i> | <i>Pub ID</i> | <i>T cell</i> | <i>Day</i> | <i>Peptide Pool</i> | <i>Cytokine</i>      | <i>%<br/>Cytokine<br/>Response</i> | <i>%<br/>Response<br/>Neg Ctrl</i> | <i>%<br/>Response<br/>Bkgd Adj</i> |
|------------|--------------|---------------|---------------|------------|---------------------|----------------------|------------------------------------|------------------------------------|------------------------------------|
|            |              | 042084        | CD4+          | 0          | BCG-Pasteur         | 2_of_3_IFNg_IL2_TNFa | 0.115                              | 0.025                              | 0.090                              |
|            | H4:IC31      | 042004        | CD8+          | 0          | BCG-Pasteur         | 2_of_3_IFNg_IL2_TNFa | 0.032                              | 0.002                              | 0.030                              |
|            |              |               |               | 70         | BCG-Pasteur         | 2_of_3_IFNg_IL2_TNFa | 0.044                              | 0.010                              | 0.033                              |
|            |              |               |               | 168        | BCG-Pasteur         | 2_of_3_IFNg_IL2_TNFa | 0.034                              | 0.003                              | 0.031                              |
|            |              | 042008        | CD4+          | 0          | BCG-Pasteur         | 2_of_3_IFNg_IL2_TNFa | 0.065                              | 0.018                              | 0.047                              |
|            |              |               |               | 70         | BCG-Pasteur         | 2_of_3_IFNg_IL2_TNFa | 0.061                              | 0.015                              | 0.046                              |
|            |              |               | CD8+          | 0          | BCG-Pasteur         | 2_of_3_IFNg_IL2_TNFa | 0.051                              | 0.000                              | 0.051                              |
|            |              |               |               | 14         | BCG-Pasteur         | 2_of_3_IFNg_IL2_TNFa | 0.131                              | 0.003                              | 0.128                              |
|            |              |               |               | 70         | BCG-Pasteur         | 2_of_3_IFNg_IL2_TNFa | 0.044                              | 0.004                              | 0.039                              |
|            |              |               |               | 168        | BCG-Pasteur         | 2_of_3_IFNg_IL2_TNFa | 0.078                              | 0.008                              | 0.070                              |
|            |              | 042012        | CD8+          | 14         | BCG-Pasteur         | 2_of_3_IFNg_IL2_TNFa | 0.060                              | 0.007                              | 0.053                              |
|            |              |               |               | 168        | BCG-Pasteur         | 2_of_3_IFNg_IL2_TNFa | 0.078                              | 0.006                              | 0.073                              |
|            |              | 042018        | CD8+          | 0          | BCG-Pasteur         | 2_of_3_IFNg_IL2_TNFa | 0.022                              | 0.000                              | 0.022                              |
|            |              |               |               | 70         | BCG-Pasteur         | 2_of_3_IFNg_IL2_TNFa | 0.036                              | 0.000                              | 0.036                              |
|            |              | 042021        | CD4+          | 70         | BCG-Pasteur         | 2_of_3_IFNg_IL2_TNFa | 0.125                              | 0.064                              | 0.061                              |
|            |              |               | CD8+          | 70         | BCG-Pasteur         | 2_of_3_IFNg_IL2_TNFa | 0.040                              | 0.004                              | 0.036                              |
|            |              | 042025        | CD8+          | 0          | BCG-Pasteur         | 2_of_3_IFNg_IL2_TNFa | 0.048                              | 0.001                              | 0.047                              |
|            |              |               |               | 70         | BCG-Pasteur         | 2_of_3_IFNg_IL2_TNFa | 0.085                              | 0.001                              | 0.084                              |
|            |              | 042032        | CD8+          | 14         | BCG-Pasteur         | 2_of_3_IFNg_IL2_TNFa | 0.097                              | 0.006                              | 0.091                              |
|            |              | 042036        | CD4+          | 0          | BCG-Pasteur         | 2_of_3_IFNg_IL2_TNFa | 0.161                              | 0.050                              | 0.111                              |
|            |              | 042037        | CD4+          | 0          | BCG-Pasteur         | 2_of_3_IFNg_IL2_TNFa | 0.078                              | 0.018                              | 0.060                              |

**Unreliable samples are excluded.**

**Records are excluded if the number of T-cell subsets is < 1,000**

**These criteria are applied separately to CD4+ and CD8+ subsets.**

**HVTN 602 / AERAS A-042: A randomized, placebo-controlled, partially blinded phase 1b clinical trial to evaluate the safety and immunogenicity of BCG revaccination, H4:IC31, and H56:IC31 in healthy, HIV-1-uninfected adolescent participants**

**Lab PT Report**

**Data as of February 5, 2018**

**Table 4**

**Listing of Positive ICS Responses Using MIMOSA**

| <i>Lab</i> | <i>Group</i> | <i>Pub ID</i> | <i>T cell</i> | <i>Day</i> | <i>Peptide Pool</i> | <i>Cytokine</i>      | <i>%<br/>Cytokine<br/>Response</i> | <i>%<br/>Response<br/>Neg Ctrl</i> | <i>%<br/>Response<br/>Bkgd Adj</i> |
|------------|--------------|---------------|---------------|------------|---------------------|----------------------|------------------------------------|------------------------------------|------------------------------------|
|            |              | 042052        | CD4+          | 0          | BCG-Pasteur         | 2_of_3_IFNg_IL2_TNFa | 0.036                              | 0.008                              | 0.029                              |
|            |              |               | CD8+          | 14         | BCG-Pasteur         | 2_of_3_IFNg_IL2_TNFa | 0.122                              | 0.005                              | 0.117                              |
|            |              |               |               | 70         | BCG-Pasteur         | 2_of_3_IFNg_IL2_TNFa | 0.059                              | 0.003                              | 0.057                              |
|            |              | 042055        | CD4+          | 70         | BCG-Pasteur         | 2_of_3_IFNg_IL2_TNFa | 0.083                              | 0.027                              | 0.056                              |
|            |              | 042074        | CD4+          | 0          | BCG-Pasteur         | 2_of_3_IFNg_IL2_TNFa | 0.095                              | 0.029                              | 0.066                              |
|            |              |               |               | 14         | BCG-Pasteur         | 2_of_3_IFNg_IL2_TNFa | 0.072                              | 0.009                              | 0.063                              |
|            |              |               |               | 70         | BCG-Pasteur         | 2_of_3_IFNg_IL2_TNFa | 0.120                              | 0.043                              | 0.077                              |
|            |              |               | CD8+          | 0          | BCG-Pasteur         | 2_of_3_IFNg_IL2_TNFa | 0.059                              | 0.003                              | 0.056                              |
|            |              |               |               | 14         | BCG-Pasteur         | 2_of_3_IFNg_IL2_TNFa | 0.046                              | 0.000                              | 0.046                              |
|            |              |               |               | 168        | BCG-Pasteur         | 2_of_3_IFNg_IL2_TNFa | 0.047                              | 0.000                              | 0.047                              |
|            |              | 042076        | CD8+          | 168        | BCG-Pasteur         | 2_of_3_IFNg_IL2_TNFa | 0.049                              | 0.004                              | 0.045                              |
| H56:IC31   |              | 042013        | CD4+          | 70         | BCG-Pasteur         | 2_of_3_IFNg_IL2_TNFa | 0.070                              | 0.011                              | 0.059                              |
|            |              | 042014        | CD8+          | 14         | BCG-Pasteur         | 2_of_3_IFNg_IL2_TNFa | 0.062                              | 0.003                              | 0.058                              |
|            |              | 042024        | CD4+          | 0          | BCG-Pasteur         | 2_of_3_IFNg_IL2_TNFa | 0.071                              | 0.014                              | 0.057                              |
|            |              |               |               | 14         | BCG-Pasteur         | 2_of_3_IFNg_IL2_TNFa | 0.145                              | 0.019                              | 0.126                              |
|            |              |               |               | 70         | BCG-Pasteur         | 2_of_3_IFNg_IL2_TNFa | 0.074                              | 0.010                              | 0.065                              |
|            |              |               |               | 168        | BCG-Pasteur         | 2_of_3_IFNg_IL2_TNFa | 0.152                              | 0.024                              | 0.128                              |
|            |              | 042028        | CD4+          | 14         | BCG-Pasteur         | 2_of_3_IFNg_IL2_TNFa | 0.077                              | 0.017                              | 0.060                              |
|            |              |               |               | 70         | BCG-Pasteur         | 2_of_3_IFNg_IL2_TNFa | 0.122                              | 0.041                              | 0.082                              |
|            |              |               |               | 168        | BCG-Pasteur         | 2_of_3_IFNg_IL2_TNFa | 0.068                              | 0.012                              | 0.056                              |
|            |              |               | CD8+          | 0          | BCG-Pasteur         | 2_of_3_IFNg_IL2_TNFa | 0.035                              | 0.002                              | 0.033                              |

**Unreliable samples are excluded.**

**Records are excluded if the number of T-cell subsets is < 1,000**

**These criteria are applied separately to CD4+ and CD8+ subsets.**



**HVTN 602 / AERAS A-042: A randomized, placebo-controlled, partially blinded phase 1b clinical trial to evaluate the safety and immunogenicity of BCG revaccination, H4:IC31, and H56:IC31 in healthy, HIV-1-uninfected adolescent participants**

**Lab PT Report**

**Data as of February 5, 2018**

**Table 4**

**Listing of Positive ICS Responses Using MIMOSA**

| <i>Lab</i> | <i>Group</i> | <i>Pub ID</i> | <i>T cell</i> | <i>Day</i> | <i>Peptide Pool</i> | <i>Cytokine</i>      | <i>%<br/>Cytokine<br/>Response</i> | <i>%<br/>Response<br/>Neg Ctrl</i> | <i>%<br/>Response<br/>Bkgd Adj</i> |
|------------|--------------|---------------|---------------|------------|---------------------|----------------------|------------------------------------|------------------------------------|------------------------------------|
|            |              | 042039        | CD4+          | 0          | BCG-Pasteur         | 2_of_3_IFNg_IL2_TNFa | 0.091                              | 0.001                              | 0.090                              |
|            |              | 042042        | CD4+          | 14         | BCG-Pasteur         | 2_of_3_IFNg_IL2_TNFa | 0.114                              | 0.048                              | 0.066                              |
|            |              |               |               | 70         | BCG-Pasteur         | 2_of_3_IFNg_IL2_TNFa | 0.196                              | 0.074                              | 0.121                              |
|            |              | 042048        | CD4+          | 0          | BCG-Pasteur         | 2_of_3_IFNg_IL2_TNFa | 0.436                              | 0.058                              | 0.378                              |
|            |              |               |               | 14         | BCG-Pasteur         | 2_of_3_IFNg_IL2_TNFa | 0.334                              | 0.019                              | 0.315                              |
|            |              |               |               | 70         | BCG-Pasteur         | 2_of_3_IFNg_IL2_TNFa | 0.293                              | 0.055                              | 0.237                              |
|            |              |               |               | 168        | BCG-Pasteur         | 2_of_3_IFNg_IL2_TNFa | 0.208                              | 0.030                              | 0.178                              |
|            |              | 042061        | CD4+          | 0          | BCG-Pasteur         | 2_of_3_IFNg_IL2_TNFa | 0.194                              | 0.015                              | 0.179                              |
|            |              |               |               | 70         | BCG-Pasteur         | 2_of_3_IFNg_IL2_TNFa | 0.189                              | 0.036                              | 0.153                              |
|            |              | 042068        | CD8+          | 0          | BCG-Pasteur         | 2_of_3_IFNg_IL2_TNFa | 0.142                              | 0.004                              | 0.138                              |
|            |              |               |               | 14         | BCG-Pasteur         | 2_of_3_IFNg_IL2_TNFa | 0.108                              | 0.000                              | 0.108                              |
|            |              |               |               | 70         | BCG-Pasteur         | 2_of_3_IFNg_IL2_TNFa | 0.116                              | 0.000                              | 0.116                              |
|            |              |               |               | 168        | BCG-Pasteur         | 2_of_3_IFNg_IL2_TNFa | 0.058                              | 0.000                              | 0.058                              |
|            |              | 042071        | CD4+          | 0          | BCG-Pasteur         | 2_of_3_IFNg_IL2_TNFa | 0.074                              | 0.030                              | 0.044                              |
|            |              |               |               | 14         | BCG-Pasteur         | 2_of_3_IFNg_IL2_TNFa | 0.206                              | 0.025                              | 0.180                              |
|            |              |               |               | 70         | BCG-Pasteur         | 2_of_3_IFNg_IL2_TNFa | 0.071                              | 0.015                              | 0.056                              |
|            |              |               |               | 168        | BCG-Pasteur         | 2_of_3_IFNg_IL2_TNFa | 0.183                              | 0.016                              | 0.167                              |
|            |              | 042073        | CD4+          | 70         | BCG-Pasteur         | 2_of_3_IFNg_IL2_TNFa | 0.180                              | 0.090                              | 0.090                              |
|            |              | 042079        | CD4+          | 0          | BCG-Pasteur         | 2_of_3_IFNg_IL2_TNFa | 0.122                              | 0.024                              | 0.098                              |
|            |              | 042080        | CD4+          | 70         | BCG-Pasteur         | 2_of_3_IFNg_IL2_TNFa | 0.054                              | 0.013                              | 0.041                              |
|            |              |               |               | 168        | BCG-Pasteur         | 2_of_3_IFNg_IL2_TNFa | 0.083                              | 0.022                              | 0.061                              |

**Unreliable samples are excluded.**

**Records are excluded if the number of T-cell subsets is < 1,000**

**These criteria are applied separately to CD4+ and CD8+ subsets.**

**HVTN 602 / AERAS A-042: A randomized, placebo-controlled, partially blinded phase 1b clinical trial to evaluate the safety and immunogenicity of BCG revaccination, H4:IC31, and H56:IC31 in healthy, HIV-1-uninfected adolescent participants**

**Lab PT Report**

**Data as of February 5, 2018**

**Table 4**

**Listing of Positive ICS Responses Using MIMOSA**

| <i>Lab</i> | <i>Group</i> | <i>Pub ID</i> | <i>T cell</i> | <i>Day</i> | <i>Peptide Pool</i> | <i>Cytokine</i>      | <i>%<br/>Cytokine<br/>Response</i> | <i>%<br/>Response<br/>Neg Ctrl</i> | <i>%<br/>Response<br/>Bkgd Adj</i> |
|------------|--------------|---------------|---------------|------------|---------------------|----------------------|------------------------------------|------------------------------------|------------------------------------|
|            |              | 042081        | CD4+          | 168        | BCG-Pasteur         | 2_of_3_IFNg_IL2_TNFa | 0.064                              | 0.027                              | 0.037                              |
|            |              | 042083        | CD4+          | 0          | BCG-Pasteur         | 2_of_3_IFNg_IL2_TNFa | 0.416                              | 0.018                              | 0.399                              |
|            |              |               |               | 14         | BCG-Pasteur         | 2_of_3_IFNg_IL2_TNFa | 0.115                              | 0.025                              | 0.090                              |
|            |              |               |               | 70         | BCG-Pasteur         | 2_of_3_IFNg_IL2_TNFa | 0.382                              | 0.015                              | 0.367                              |
|            |              |               |               | 168        | BCG-Pasteur         | 2_of_3_IFNg_IL2_TNFa | 0.211                              | 0.026                              | 0.184                              |
| Placebo    |              | 042019        | CD4+          | 14         | BCG-Pasteur         | 2_of_3_IFNg_IL2_TNFa | 0.095                              | 0.007                              | 0.088                              |
|            |              |               |               | 168        | BCG-Pasteur         | 2_of_3_IFNg_IL2_TNFa | 0.084                              | 0.022                              | 0.062                              |
|            |              | 042029        | CD8+          | 0          | BCG-Pasteur         | 2_of_3_IFNg_IL2_TNFa | 0.035                              | 0.001                              | 0.033                              |
|            |              |               |               | 70         | BCG-Pasteur         | 2_of_3_IFNg_IL2_TNFa | 0.032                              | 0.002                              | 0.029                              |
|            |              | 042033        | CD4+          | 0          | BCG-Pasteur         | 2_of_3_IFNg_IL2_TNFa | 0.053                              | 0.008                              | 0.045                              |
|            |              |               |               | 70         | BCG-Pasteur         | 2_of_3_IFNg_IL2_TNFa | 0.052                              | 0.010                              | 0.042                              |
|            |              | 042045        | CD4+          | 168        | BCG-Pasteur         | 2_of_3_IFNg_IL2_TNFa | 0.065                              | 0.023                              | 0.042                              |
|            |              | 042070        | CD4+          | 0          | BCG-Pasteur         | 2_of_3_IFNg_IL2_TNFa | 0.276                              | 0.062                              | 0.214                              |
|            |              | 042072        | CD4+          | 0          | BCG-Pasteur         | 2_of_3_IFNg_IL2_TNFa | 0.059                              | 0.005                              | 0.054                              |
|            |              |               |               | 14         | BCG-Pasteur         | 2_of_3_IFNg_IL2_TNFa | 0.059                              | 0.009                              | 0.049                              |
|            |              |               |               | 70         | BCG-Pasteur         | 2_of_3_IFNg_IL2_TNFa | 0.080                              | 0.006                              | 0.074                              |
|            |              |               |               | 168        | BCG-Pasteur         | 2_of_3_IFNg_IL2_TNFa | 0.071                              | 0.014                              | 0.057                              |
|            |              | 042075        | CD4+          | 0          | BCG-Pasteur         | 2_of_3_IFNg_IL2_TNFa | 0.113                              | 0.037                              | 0.076                              |
|            |              |               |               | 168        | BCG-Pasteur         | 2_of_3_IFNg_IL2_TNFa | 0.064                              | 0.011                              | 0.054                              |
| BCG        |              | 042005        | CD4+          | 28         | TB 10.4             | 2_of_3_IFNg_IL2_TNFa | 0.082                              | 0.028                              | 0.054                              |
|            |              | 042016        | CD4+          | 168        | Ag85B               | 2_of_3_IFNg_IL2_TNFa | 0.149                              | 0.056                              | 0.093                              |

**Unreliable samples are excluded.**

**Records are excluded if the number of T-cell subsets is < 1,000**

**These criteria are applied separately to CD4+ and CD8+ subsets.**

**HVTN 602 / AERAS A-042: A randomized, placebo-controlled, partially blinded phase 1b clinical trial to evaluate the safety and immunogenicity of BCG revaccination, H4:IC31, and H56:IC31 in healthy, HIV-1-uninfected adolescent participants**

**Lab PT Report**

**Data as of February 5, 2018**

**Table 4**

**Listing of Positive ICS Responses Using MIMOSA**

| Lab     | Group | Pub ID | T cell | Day | Peptide Pool | Cytokine             | % Cytokine Response | % Response Neg Ctrl | % Response Bkgd Adj |
|---------|-------|--------|--------|-----|--------------|----------------------|---------------------|---------------------|---------------------|
|         |       | 042022 | CD4+   | 28  | TB 10.4      | 2_of_3_IFNg_IL2_TNFa | 0.198               | 0.025               | 0.174               |
|         |       |        |        | 168 | TB 10.4      | 2_of_3_IFNg_IL2_TNFa | 0.101               | 0.026               | 0.076               |
|         |       | 042027 | CD4+   | 168 | Ag85B        | 2_of_3_IFNg_IL2_TNFa | 0.163               | 0.038               | 0.124               |
|         |       |        |        |     | TB 10.4      | 2_of_3_IFNg_IL2_TNFa | 0.133               | 0.038               | 0.095               |
|         |       | 042053 | CD4+   | 0   | TB 10.4      | 2_of_3_IFNg_IL2_TNFa | 0.145               | 0.016               | 0.129               |
|         |       |        |        | 28  | TB 10.4      | 2_of_3_IFNg_IL2_TNFa | 0.289               | 0.048               | 0.240               |
|         |       |        |        | 70  | TB 10.4      | 2_of_3_IFNg_IL2_TNFa | 0.201               | 0.018               | 0.183               |
|         |       |        |        | 168 | TB 10.4      | 2_of_3_IFNg_IL2_TNFa | 0.238               | 0.056               | 0.182               |
|         |       | 042058 | CD4+   | 70  | TB 10.4      | 2_of_3_IFNg_IL2_TNFa | 0.072               | 0.018               | 0.053               |
|         |       | 042065 | CD4+   | 28  | TB 10.4      | 2_of_3_IFNg_IL2_TNFa | 0.105               | 0.019               | 0.086               |
|         |       |        |        | 168 | TB 10.4      | 2_of_3_IFNg_IL2_TNFa | 0.058               | 0.005               | 0.054               |
| H4:IC31 |       | 042006 | CD4+   | 14  | Ag85B        | 2_of_3_IFNg_IL2_TNFa | 0.132               | 0.064               | 0.068               |
|         |       |        |        | 168 | Ag85B        | 2_of_3_IFNg_IL2_TNFa | 0.132               | 0.050               | 0.081               |
|         |       | 042008 | CD4+   | 70  | Ag85B        | 2_of_3_IFNg_IL2_TNFa | 0.143               | 0.015               | 0.128               |
|         |       |        |        |     | TB 10.4      | 2_of_3_IFNg_IL2_TNFa | 0.180               | 0.015               | 0.165               |
|         |       |        |        | 168 | Ag85B        | 2_of_3_IFNg_IL2_TNFa | 0.120               | 0.048               | 0.071               |
|         |       |        |        |     | TB 10.4      | 2_of_3_IFNg_IL2_TNFa | 0.135               | 0.048               | 0.087               |
|         |       | 042012 | CD4+   | 70  | Ag85B        | 2_of_3_IFNg_IL2_TNFa | 0.247               | 0.041               | 0.207               |
|         |       |        |        | 168 | Ag85B        | 2_of_3_IFNg_IL2_TNFa | 0.123               | 0.031               | 0.092               |
|         |       |        |        |     | TB 10.4      | 2_of_3_IFNg_IL2_TNFa | 0.098               | 0.031               | 0.067               |
|         |       | 042018 | CD4+   | 70  | Ag85B        | 2_of_3_IFNg_IL2_TNFa | 0.093               | 0.033               | 0.060               |

**Unreliable samples are excluded.**

**Records are excluded if the number of T-cell subsets is < 1,000**

**These criteria are applied separately to CD4+ and CD8+ subsets.**

**HVTN 602 / AERAS A-042: A randomized, placebo-controlled, partially blinded phase 1b clinical trial to evaluate the safety and immunogenicity of BCG revaccination, H4:IC31, and H56:IC31 in healthy, HIV-1-uninfected adolescent participants**

**Lab PT Report**

**Data as of February 5, 2018**

**Table 4**

**Listing of Positive ICS Responses Using MIMOSA**

| Lab | Group | Pub ID | T cell | Day | Peptide Pool | Cytokine             | % Cytokine Response | % Response Neg Ctrl | % Response Bkgd Adj |
|-----|-------|--------|--------|-----|--------------|----------------------|---------------------|---------------------|---------------------|
|     |       |        |        | 168 | Ag85B        | 2_of_3_IFNg_IL2_TNFa | 0.168               | 0.033               | 0.134               |
|     |       | 042021 | CD4+   | 70  | Ag85B        | 2_of_3_IFNg_IL2_TNFa | 0.290               | 0.064               | 0.226               |
|     |       |        |        |     | TB 10.4      | 2_of_3_IFNg_IL2_TNFa | 0.248               | 0.064               | 0.184               |
|     |       |        |        | 168 | Ag85B        | 2_of_3_IFNg_IL2_TNFa | 0.187               | 0.061               | 0.127               |
|     |       |        |        |     | TB 10.4      | 2_of_3_IFNg_IL2_TNFa | 0.153               | 0.061               | 0.092               |
|     |       | 042025 | CD4+   | 70  | Ag85B        | 2_of_3_IFNg_IL2_TNFa | 0.257               | 0.011               | 0.246               |
|     |       |        |        |     | TB 10.4      | 2_of_3_IFNg_IL2_TNFa | 0.127               | 0.011               | 0.116               |
|     |       |        |        | 168 | Ag85B        | 2_of_3_IFNg_IL2_TNFa | 0.170               | 0.023               | 0.147               |
|     |       | 042032 | CD4+   | 70  | Ag85B        | 2_of_3_IFNg_IL2_TNFa | 0.496               | 0.065               | 0.430               |
|     |       |        |        |     | TB 10.4      | 2_of_3_IFNg_IL2_TNFa | 0.236               | 0.065               | 0.171               |
|     |       |        |        | 168 | Ag85B        | 2_of_3_IFNg_IL2_TNFa | 0.376               | 0.020               | 0.355               |
|     |       |        |        |     | TB 10.4      | 2_of_3_IFNg_IL2_TNFa | 0.187               | 0.020               | 0.167               |
|     |       | 042036 | CD4+   | 168 | Ag85B        | 2_of_3_IFNg_IL2_TNFa | 0.093               | 0.031               | 0.062               |
|     |       | 042037 | CD4+   | 168 | Ag85B        | 2_of_3_IFNg_IL2_TNFa | 0.100               | 0.027               | 0.072               |
|     |       | 042047 | CD4+   | 14  | Ag85B        | 2_of_3_IFNg_IL2_TNFa | 0.096               | 0.035               | 0.061               |
|     |       |        |        |     | TB 10.4      | 2_of_3_IFNg_IL2_TNFa | 0.110               | 0.035               | 0.075               |
|     |       |        |        | 168 | Ag85B        | 2_of_3_IFNg_IL2_TNFa | 0.091               | 0.018               | 0.073               |
|     |       |        |        |     | TB 10.4      | 2_of_3_IFNg_IL2_TNFa | 0.070               | 0.018               | 0.052               |
|     |       | 042049 | CD4+   | 70  | Ag85B        | 2_of_3_IFNg_IL2_TNFa | 0.094               | 0.016               | 0.077               |
|     |       |        |        |     | TB 10.4      | 2_of_3_IFNg_IL2_TNFa | 0.068               | 0.016               | 0.051               |
|     |       | 042050 | CD4+   | 70  | Ag85B        | 2_of_3_IFNg_IL2_TNFa | 0.067               | 0.016               | 0.051               |

**Unreliable samples are excluded.**

**Records are excluded if the number of T-cell subsets is < 1,000**

**These criteria are applied separately to CD4+ and CD8+ subsets.**

**HVTN 602 / AERAS A-042: A randomized, placebo-controlled, partially blinded phase 1b clinical trial to evaluate the safety and immunogenicity of BCG revaccination, H4:IC31, and H56:IC31 in healthy, HIV-1-uninfected adolescent participants**

**Lab PT Report**

**Data as of February 5, 2018**

**Table 4**

**Listing of Positive ICS Responses Using MIMOSA**

| Lab      | Group | Pub ID | T cell | Day | Peptide Pool | Cytokine             | % Cytokine Response | % Response Neg Ctrl | % Response Bkgd Adj |
|----------|-------|--------|--------|-----|--------------|----------------------|---------------------|---------------------|---------------------|
|          |       | 042055 | CD4+   | 70  | Ag85B        | 2_of_3_IFNg_IL2_TNFa | 0.301               | 0.027               | 0.274               |
|          |       |        |        |     | TB 10.4      | 2_of_3_IFNg_IL2_TNFa | 0.147               | 0.027               | 0.120               |
|          |       |        |        | 168 | Ag85B        | 2_of_3_IFNg_IL2_TNFa | 0.156               | 0.015               | 0.140               |
|          |       |        |        |     | TB 10.4      | 2_of_3_IFNg_IL2_TNFa | 0.105               | 0.015               | 0.090               |
|          |       | 042059 | CD4+   | 14  | TB 10.4      | 2_of_3_IFNg_IL2_TNFa | 0.152               | 0.074               | 0.078               |
|          |       |        |        | 70  | Ag85B        | 2_of_3_IFNg_IL2_TNFa | 0.098               | 0.029               | 0.069               |
|          |       |        |        |     | TB 10.4      | 2_of_3_IFNg_IL2_TNFa | 0.197               | 0.029               | 0.168               |
|          |       |        |        | 168 | Ag85B        | 2_of_3_IFNg_IL2_TNFa | 0.075               | 0.025               | 0.051               |
|          |       |        |        |     | ESAT-6       | 2_of_3_IFNg_IL2_TNFa | 0.092               | 0.025               | 0.068               |
|          |       |        |        |     | TB 10.4      | 2_of_3_IFNg_IL2_TNFa | 0.265               | 0.025               | 0.240               |
|          |       | 042074 | CD4+   | 14  | Ag85B        | 2_of_3_IFNg_IL2_TNFa | 0.075               | 0.009               | 0.066               |
|          |       |        |        | 70  | Ag85B        | 2_of_3_IFNg_IL2_TNFa | 0.204               | 0.043               | 0.161               |
|          |       |        |        | 168 | Ag85B        | 2_of_3_IFNg_IL2_TNFa | 0.129               | 0.016               | 0.113               |
|          |       | 042076 | CD4+   | 70  | Ag85B        | 2_of_3_IFNg_IL2_TNFa | 0.342               | 0.057               | 0.284               |
|          |       |        |        | 168 | Ag85B        | 2_of_3_IFNg_IL2_TNFa | 0.232               | 0.028               | 0.204               |
|          |       | 042082 | CD4+   | 168 | Ag85B        | 2_of_3_IFNg_IL2_TNFa | 0.067               | 0.021               | 0.046               |
| H56:IC31 |       | 042013 | CD4+   | 70  | Ag85B        | 2_of_3_IFNg_IL2_TNFa | 0.157               | 0.011               | 0.146               |
|          |       | 042014 | CD4+   | 14  | Ag85B        | 2_of_3_IFNg_IL2_TNFa | 0.037               | 0.011               | 0.027               |
|          |       |        |        | 70  | Ag85B        | 2_of_3_IFNg_IL2_TNFa | 0.086               | 0.017               | 0.069               |
|          |       |        |        |     | ESAT-6       | 2_of_3_IFNg_IL2_TNFa | 0.083               | 0.017               | 0.066               |
|          |       |        |        | 168 | Ag85B        | 2_of_3_IFNg_IL2_TNFa | 0.047               | 0.007               | 0.040               |

**Unreliable samples are excluded.**

**Records are excluded if the number of T-cell subsets is < 1,000**

**These criteria are applied separately to CD4+ and CD8+ subsets.**

**HVTN 602 / AERAS A-042: A randomized, placebo-controlled, partially blinded phase 1b clinical trial to evaluate the safety and immunogenicity of BCG revaccination, H4:IC31, and H56:IC31 in healthy, HIV-1-uninfected adolescent participants**

**Lab PT Report**

**Data as of February 5, 2018**

**Table 4**

**Listing of Positive ICS Responses Using MIMOSA**

| Lab | Group | Pub ID | T cell | Day | Peptide Pool | Cytokine             | % Cytokine Response | % Response Neg Ctrl | % Response Bkgd Adj |
|-----|-------|--------|--------|-----|--------------|----------------------|---------------------|---------------------|---------------------|
|     |       | 042015 | CD4+   | 70  | Ag85B        | 2_of_3_IFNg_IL2_TNFa | 0.104               | 0.030               | 0.074               |
|     |       | 042023 | CD4+   | 0   | TB 10.4      | 2_of_3_IFNg_IL2_TNFa | 0.070               | 0.015               | 0.055               |
|     |       |        |        | 14  | TB 10.4      | 2_of_3_IFNg_IL2_TNFa | 0.072               | 0.016               | 0.056               |
|     |       |        |        | 70  | Ag85B        | 2_of_3_IFNg_IL2_TNFa | 0.135               | 0.011               | 0.124               |
|     |       |        |        |     | TB 10.4      | 2_of_3_IFNg_IL2_TNFa | 0.073               | 0.011               | 0.062               |
|     |       |        |        | 168 | Ag85B        | 2_of_3_IFNg_IL2_TNFa | 0.094               | 0.025               | 0.069               |
|     |       | 042024 | CD4+   | 14  | ESAT-6       | 2_of_3_IFNg_IL2_TNFa | 0.106               | 0.019               | 0.087               |
|     |       |        |        | 70  | ESAT-6       | 2_of_3_IFNg_IL2_TNFa | 0.060               | 0.010               | 0.051               |
|     |       | 042028 | CD4+   | 14  | Ag85B        | 2_of_3_IFNg_IL2_TNFa | 0.051               | 0.017               | 0.034               |
|     |       |        |        | 70  | Ag85B        | 2_of_3_IFNg_IL2_TNFa | 0.145               | 0.041               | 0.104               |
|     |       |        |        | 168 | Ag85B        | 2_of_3_IFNg_IL2_TNFa | 0.057               | 0.012               | 0.046               |
|     |       | 042039 | CD4+   | 0   | Ag85B        | 2_of_3_IFNg_IL2_TNFa | 0.062               | 0.001               | 0.060               |
|     |       |        |        |     | ESAT-6       | 2_of_3_IFNg_IL2_TNFa | 0.035               | 0.001               | 0.034               |
|     |       |        |        |     | TB 10.4      | 2_of_3_IFNg_IL2_TNFa | 0.046               | 0.001               | 0.045               |
|     |       |        |        | 70  | Ag85B        | 2_of_3_IFNg_IL2_TNFa | 0.254               | 0.048               | 0.207               |
|     |       |        |        | 168 | Ag85B        | 2_of_3_IFNg_IL2_TNFa | 0.226               | 0.085               | 0.141               |
|     |       | 042042 | CD4+   | 14  | Ag85B        | 2_of_3_IFNg_IL2_TNFa | 0.172               | 0.048               | 0.124               |
|     |       |        |        | 70  | Ag85B        | 2_of_3_IFNg_IL2_TNFa | 0.426               | 0.074               | 0.352               |
|     |       |        |        | 168 | Ag85B        | 2_of_3_IFNg_IL2_TNFa | 0.292               | 0.059               | 0.233               |
|     |       | 042044 | CD4+   | 70  | Ag85B        | 2_of_3_IFNg_IL2_TNFa | 0.071               | 0.010               | 0.061               |
|     |       |        |        | 168 | Ag85B        | 2_of_3_IFNg_IL2_TNFa | 0.055               | 0.013               | 0.042               |

**Unreliable samples are excluded.**

**Records are excluded if the number of T-cell subsets is < 1,000**

**These criteria are applied separately to CD4+ and CD8+ subsets.**

**HVTN 602 / AERAS A-042: A randomized, placebo-controlled, partially blinded phase 1b clinical trial to evaluate the safety and immunogenicity of BCG revaccination, H4:IC31, and H56:IC31 in healthy, HIV-1-uninfected adolescent participants**

**Lab PT Report**

**Data as of February 5, 2018**

**Table 4**

**Listing of Positive ICS Responses Using MIMOSA**

| Lab | Group | Pub ID | T cell | Day | Peptide Pool | Cytokine             | % Cytokine Response | % Response Neg Ctrl | % Response Bkgd Adj |
|-----|-------|--------|--------|-----|--------------|----------------------|---------------------|---------------------|---------------------|
|     |       | 042048 | CD4+   | 0   | TB 10.4      | 2_of_3_IFNg_IL2_TNFa | 0.228               | 0.058               | 0.170               |
|     |       |        |        | 14  | Ag85B        | 2_of_3_IFNg_IL2_TNFa | 0.102               | 0.019               | 0.083               |
|     |       |        |        |     | TB 10.4      | 2_of_3_IFNg_IL2_TNFa | 0.213               | 0.019               | 0.194               |
|     |       |        |        | 168 | Ag85B        | 2_of_3_IFNg_IL2_TNFa | 0.123               | 0.030               | 0.093               |
|     |       |        |        |     | TB 10.4      | 2_of_3_IFNg_IL2_TNFa | 0.194               | 0.030               | 0.164               |
|     |       | 042061 | CD4+   | 0   | TB 10.4      | 2_of_3_IFNg_IL2_TNFa | 0.069               | 0.015               | 0.054               |
|     |       |        |        | 70  | Ag85B        | 2_of_3_IFNg_IL2_TNFa | 0.253               | 0.036               | 0.217               |
|     |       |        |        |     | TB 10.4      | 2_of_3_IFNg_IL2_TNFa | 0.098               | 0.036               | 0.062               |
|     |       | 042068 | CD4+   | 70  | Ag85B        | 2_of_3_IFNg_IL2_TNFa | 0.098               | 0.004               | 0.094               |
|     |       | 042071 | CD4+   | 70  | Ag85B        | 2_of_3_IFNg_IL2_TNFa | 0.136               | 0.015               | 0.121               |
|     |       |        |        | 168 | Ag85B        | 2_of_3_IFNg_IL2_TNFa | 0.078               | 0.016               | 0.063               |
|     |       | 042073 | CD4+   | 168 | ESAT-6       | 2_of_3_IFNg_IL2_TNFa | 0.140               | 0.061               | 0.079               |
|     |       |        |        |     | TB 10.4      | 2_of_3_IFNg_IL2_TNFa | 0.138               | 0.061               | 0.077               |
|     |       | 042079 | CD4+   | 0   | TB 10.4      | 2_of_3_IFNg_IL2_TNFa | 0.103               | 0.024               | 0.078               |
|     |       |        |        | 70  | TB 10.4      | 2_of_3_IFNg_IL2_TNFa | 0.086               | 0.017               | 0.068               |
|     |       | 042080 | CD4+   | 14  | Ag85B        | 2_of_3_IFNg_IL2_TNFa | 0.095               | 0.031               | 0.064               |
|     |       |        |        | 70  | Ag85B        | 2_of_3_IFNg_IL2_TNFa | 0.088               | 0.013               | 0.076               |
|     |       | 042083 | CD4+   | 14  | Ag85B        | 2_of_3_IFNg_IL2_TNFa | 0.189               | 0.025               | 0.164               |
|     |       |        |        | 70  | Ag85B        | 2_of_3_IFNg_IL2_TNFa | 0.525               | 0.015               | 0.511               |
|     |       |        |        |     | ESAT-6       | 2_of_3_IFNg_IL2_TNFa | 0.081               | 0.015               | 0.066               |
|     |       |        |        | 168 | Ag85B        | 2_of_3_IFNg_IL2_TNFa | 0.348               | 0.026               | 0.321               |

**Unreliable samples are excluded.**

**Records are excluded if the number of T-cell subsets is < 1,000**

**These criteria are applied separately to CD4+ and CD8+ subsets.**

**HVTN 602 / AERAS A-042: A randomized, placebo-controlled, partially blinded phase 1b clinical trial to evaluate the safety and immunogenicity of BCG revaccination, H4:IC31, and H56:IC31 in healthy, HIV-1-uninfected adolescent participants**

**Lab PT Report**

**Data as of February 5, 2018**

**Table 4**

**Listing of Positive ICS Responses Using MIMOSA**

| Lab | Group  | Pub ID | T cell | Day | Peptide Pool         | Cytokine             | % Cytokine Response | % Response Neg Ctrl | % Response Bkgd Adj |
|-----|--------|--------|--------|-----|----------------------|----------------------|---------------------|---------------------|---------------------|
|     |        |        |        |     | ESAT-6               | 2_of_3_IFNg_IL2_TNFa | 0.089               | 0.026               | 0.062               |
| BCG | 042002 | CD8+   | 0      | CMV | 2_of_3_IFNg_IL2_TNFa | 0.585                | 0.002               | 0.583               |                     |
|     |        |        | 28     | CMV | 2_of_3_IFNg_IL2_TNFa | 0.389                | 0.004               | 0.385               |                     |
|     |        |        | 70     | CMV | 2_of_3_IFNg_IL2_TNFa | 0.658                | 0.000               | 0.658               |                     |
|     | 042005 | CD4+   | 0      | CMV | 2_of_3_IFNg_IL2_TNFa | 0.374                | 0.026               | 0.349               |                     |
|     |        |        | 28     | CMV | 2_of_3_IFNg_IL2_TNFa | 0.528                | 0.028               | 0.500               |                     |
|     |        |        | 70     | CMV | 2_of_3_IFNg_IL2_TNFa | 0.519                | 0.032               | 0.488               |                     |
|     |        |        | 168    | CMV | 2_of_3_IFNg_IL2_TNFa | 0.572                | 0.020               | 0.552               |                     |
|     |        | CD8+   | 28     | CMV | 2_of_3_IFNg_IL2_TNFa | 0.025                | 0.000               | 0.025               |                     |
|     |        |        | 168    | CMV | 2_of_3_IFNg_IL2_TNFa | 0.037                | 0.002               | 0.035               |                     |
|     | 042016 | CD4+   | 0      | CMV | 2_of_3_IFNg_IL2_TNFa | 0.117                | 0.014               | 0.103               |                     |
|     |        |        | 28     | CMV | 2_of_3_IFNg_IL2_TNFa | 0.166                | 0.041               | 0.125               |                     |
|     |        |        | 70     | CMV | 2_of_3_IFNg_IL2_TNFa | 0.096                | 0.008               | 0.088               |                     |
|     |        | CD8+   | 0      | CMV | 2_of_3_IFNg_IL2_TNFa | 0.689                | 0.001               | 0.688               |                     |
|     |        |        | 28     | CMV | 2_of_3_IFNg_IL2_TNFa | 0.778                | 0.006               | 0.772               |                     |
|     |        |        | 70     | CMV | 2_of_3_IFNg_IL2_TNFa | 0.872                | 0.001               | 0.871               |                     |
|     | 042022 | CD4+   | 28     | CMV | 2_of_3_IFNg_IL2_TNFa | 0.096                | 0.025               | 0.072               |                     |
|     |        |        | 168    | CMV | 2_of_3_IFNg_IL2_TNFa | 0.097                | 0.026               | 0.072               |                     |
|     |        | CD8+   | 0      | CMV | 2_of_3_IFNg_IL2_TNFa | 0.787                | 0.003               | 0.785               |                     |
|     |        |        | 28     | CMV | 2_of_3_IFNg_IL2_TNFa | 0.689                | 0.000               | 0.689               |                     |
|     |        |        | 168    | CMV | 2_of_3_IFNg_IL2_TNFa | 0.441                | 0.004               | 0.437               |                     |

**Unreliable samples are excluded.**

**Records are excluded if the number of T-cell subsets is < 1,000**

**These criteria are applied separately to CD4+ and CD8+ subsets.**



**HVTN 602 / AERAS A-042: A randomized, placebo-controlled, partially blinded phase 1b clinical trial to evaluate the safety and immunogenicity of BCG revaccination, H4:IC31, and H56:IC31 in healthy, HIV-1-uninfected adolescent participants**

**Lab PT Report**

**Data as of February 5, 2018**

**Table 4**

**Listing of Positive ICS Responses Using MIMOSA**

| Lab | Group | Pub ID | T cell | Day | Peptide Pool | Cytokine             | % Cytokine Response | % Response Neg Ctrl | % Response Bkgd Adj |
|-----|-------|--------|--------|-----|--------------|----------------------|---------------------|---------------------|---------------------|
|     |       | 042026 | CD4+   | 0   | CMV          | 2_of_3_IFNg_IL2_TNFa | 0.084               | 0.021               | 0.063               |
|     |       |        |        | 28  | CMV          | 2_of_3_IFNg_IL2_TNFa | 0.039               | 0.014               | 0.026               |
|     |       |        |        | 70  | CMV          | 2_of_3_IFNg_IL2_TNFa | 0.072               | 0.006               | 0.065               |
|     |       |        | CD8+   | 0   | CMV          | 2_of_3_IFNg_IL2_TNFa | 2.923               | 0.003               | 2.920               |
|     |       |        |        | 28  | CMV          | 2_of_3_IFNg_IL2_TNFa | 1.237               | 0.005               | 1.233               |
|     |       |        |        | 70  | CMV          | 2_of_3_IFNg_IL2_TNFa | 2.767               | 0.004               | 2.762               |
|     |       | 042027 | CD4+   | 0   | CMV          | 2_of_3_IFNg_IL2_TNFa | 0.054               | 0.020               | 0.034               |
|     |       |        | CD8+   | 0   | CMV          | 2_of_3_IFNg_IL2_TNFa | 0.029               | 0.002               | 0.027               |
|     |       |        |        | 168 | CMV          | 2_of_3_IFNg_IL2_TNFa | 0.050               | 0.009               | 0.040               |
|     |       | 042030 | CD4+   | 0   | CMV          | 2_of_3_IFNg_IL2_TNFa | 0.150               | 0.025               | 0.126               |
|     |       |        |        | 28  | CMV          | 2_of_3_IFNg_IL2_TNFa | 0.091               | 0.028               | 0.063               |
|     |       |        |        | 70  | CMV          | 2_of_3_IFNg_IL2_TNFa | 0.082               | 0.041               | 0.041               |
|     |       |        |        | 168 | CMV          | 2_of_3_IFNg_IL2_TNFa | 0.142               | 0.062               | 0.079               |
|     |       |        | CD8+   | 0   | CMV          | 2_of_3_IFNg_IL2_TNFa | 2.465               | 0.027               | 2.437               |
|     |       |        |        | 28  | CMV          | 2_of_3_IFNg_IL2_TNFa | 1.533               | 0.009               | 1.523               |
|     |       |        |        | 70  | CMV          | 2_of_3_IFNg_IL2_TNFa | 1.070               | 0.010               | 1.059               |
|     |       |        |        | 168 | CMV          | 2_of_3_IFNg_IL2_TNFa | 1.513               | 0.010               | 1.503               |
|     |       | 042031 | CD4+   | 0   | CMV          | 2_of_3_IFNg_IL2_TNFa | 0.371               | 0.020               | 0.351               |
|     |       |        |        | 70  | CMV          | 2_of_3_IFNg_IL2_TNFa | 0.489               | 0.036               | 0.454               |
|     |       |        | CD8+   | 0   | CMV          | 2_of_3_IFNg_IL2_TNFa | 0.497               | 0.000               | 0.497               |
|     |       |        |        | 70  | CMV          | 2_of_3_IFNg_IL2_TNFa | 0.630               | 0.006               | 0.624               |

**Unreliable samples are excluded.**

**Records are excluded if the number of T-cell subsets is < 1,000**

**These criteria are applied separately to CD4+ and CD8+ subsets.**

**HVTN 602 / AERAS A-042: A randomized, placebo-controlled, partially blinded phase 1b clinical trial to evaluate the safety and immunogenicity of BCG revaccination, H4:IC31, and H56:IC31 in healthy, HIV-1-uninfected adolescent participants**

**Lab PT Report**

**Data as of February 5, 2018**

**Table 4**

**Listing of Positive ICS Responses Using MIMOSA**

| Lab | Group | Pub ID | T cell | Day | Peptide Pool | Cytokine             | % Cytokine Response | % Response Neg Ctrl | % Response Bkgd Adj |
|-----|-------|--------|--------|-----|--------------|----------------------|---------------------|---------------------|---------------------|
|     |       | 042035 | CD4+   | 0   | CMV          | 2_of_3_IFNg_IL2_TNFa | 0.215               | 0.054               | 0.161               |
|     |       |        |        | 28  | CMV          | 2_of_3_IFNg_IL2_TNFa | 0.148               | 0.090               | 0.058               |
|     |       |        |        | 70  | CMV          | 2_of_3_IFNg_IL2_TNFa | 0.135               | 0.035               | 0.100               |
|     |       |        |        | 168 | CMV          | 2_of_3_IFNg_IL2_TNFa | 0.169               | 0.049               | 0.120               |
|     |       |        | CD8+   | 0   | CMV          | 2_of_3_IFNg_IL2_TNFa | 4.488               | 0.000               | 4.488               |
|     |       |        |        | 28  | CMV          | 2_of_3_IFNg_IL2_TNFa | 3.408               | 0.014               | 3.394               |
|     |       |        |        | 70  | CMV          | 2_of_3_IFNg_IL2_TNFa | 3.314               | 0.006               | 3.307               |
|     |       |        |        | 168 | CMV          | 2_of_3_IFNg_IL2_TNFa | 4.467               | 0.003               | 4.464               |
|     |       | 042038 | CD4+   | 0   | CMV          | 2_of_3_IFNg_IL2_TNFa | 1.234               | 0.034               | 1.200               |
|     |       |        |        | 70  | CMV          | 2_of_3_IFNg_IL2_TNFa | 1.520               | 0.027               | 1.493               |
|     |       |        | CD8+   | 0   | CMV          | 2_of_3_IFNg_IL2_TNFa | 0.956               | 0.002               | 0.953               |
|     |       |        |        | 70  | CMV          | 2_of_3_IFNg_IL2_TNFa | 0.838               | 0.000               | 0.838               |
|     |       | 042043 | CD4+   | 0   | CMV          | 2_of_3_IFNg_IL2_TNFa | 0.391               | 0.022               | 0.369               |
|     |       |        |        | 70  | CMV          | 2_of_3_IFNg_IL2_TNFa | 0.371               | 0.016               | 0.355               |
|     |       |        | CD8+   | 0   | CMV          | 2_of_3_IFNg_IL2_TNFa | 3.992               | 0.005               | 3.987               |
|     |       |        |        | 70  | CMV          | 2_of_3_IFNg_IL2_TNFa | 3.374               | 0.002               | 3.372               |
|     |       | 042051 | CD4+   | 28  | CMV          | 2_of_3_IFNg_IL2_TNFa | 0.780               | 0.028               | 0.752               |
|     |       |        |        | 168 | CMV          | 2_of_3_IFNg_IL2_TNFa | 0.551               | 0.018               | 0.534               |
|     |       |        | CD8+   | 28  | CMV          | 2_of_3_IFNg_IL2_TNFa | 0.618               | 0.002               | 0.616               |
|     |       |        |        | 168 | CMV          | 2_of_3_IFNg_IL2_TNFa | 0.668               | 0.000               | 0.668               |
|     |       | 042053 | CD4+   | 0   | CMV          | 2_of_3_IFNg_IL2_TNFa | 0.071               | 0.016               | 0.055               |

**Unreliable samples are excluded.**

**Records are excluded if the number of T-cell subsets is < 1,000**

**These criteria are applied separately to CD4+ and CD8+ subsets.**

**HVTN 602 / AERAS A-042: A randomized, placebo-controlled, partially blinded phase 1b clinical trial to evaluate the safety and immunogenicity of BCG revaccination, H4:IC31, and H56:IC31 in healthy, HIV-1-uninfected adolescent participants**

**Lab PT Report**

**Data as of February 5, 2018**

**Table 4**

**Listing of Positive ICS Responses Using MIMOSA**

| Lab | Group | Pub ID | T cell | Day | Peptide Pool | Cytokine             | % Cytokine Response | % Response Neg Ctrl | % Response Bkgd Adj |
|-----|-------|--------|--------|-----|--------------|----------------------|---------------------|---------------------|---------------------|
|     |       |        |        | 28  | CMV          | 2_of_3_IFNg_IL2_TNFa | 0.105               | 0.048               | 0.057               |
|     |       |        |        | 70  | CMV          | 2_of_3_IFNg_IL2_TNFa | 0.070               | 0.018               | 0.052               |
|     |       |        | CD8+   | 0   | CMV          | 2_of_3_IFNg_IL2_TNFa | 0.048               | 0.008               | 0.040               |
|     |       |        |        | 28  | CMV          | 2_of_3_IFNg_IL2_TNFa | 0.076               | 0.014               | 0.062               |
|     |       |        |        | 70  | CMV          | 2_of_3_IFNg_IL2_TNFa | 0.054               | 0.001               | 0.053               |
|     |       | 042056 | CD4+   | 70  | CMV          | 2_of_3_IFNg_IL2_TNFa | 0.223               | 0.087               | 0.136               |
|     |       |        |        | 168 | CMV          | 2_of_3_IFNg_IL2_TNFa | 0.233               | 0.076               | 0.157               |
|     |       |        | CD8+   | 28  | CMV          | 2_of_3_IFNg_IL2_TNFa | 1.914               | 0.004               | 1.910               |
|     |       |        |        | 70  | CMV          | 2_of_3_IFNg_IL2_TNFa | 2.746               | 0.003               | 2.743               |
|     |       |        |        | 168 | CMV          | 2_of_3_IFNg_IL2_TNFa | 2.042               | 0.014               | 2.028               |
|     |       | 042058 | CD4+   | 0   | CMV          | 2_of_3_IFNg_IL2_TNFa | 0.211               | 0.019               | 0.193               |
|     |       |        |        | 70  | CMV          | 2_of_3_IFNg_IL2_TNFa | 0.112               | 0.018               | 0.094               |
|     |       |        | CD8+   | 0   | CMV          | 2_of_3_IFNg_IL2_TNFa | 0.979               | 0.004               | 0.975               |
|     |       |        |        | 70  | CMV          | 2_of_3_IFNg_IL2_TNFa | 0.826               | 0.002               | 0.824               |
|     |       | 042062 | CD4+   | 28  | CMV          | 2_of_3_IFNg_IL2_TNFa | 0.099               | 0.048               | 0.051               |
|     |       |        |        | 168 | CMV          | 2_of_3_IFNg_IL2_TNFa | 0.108               | 0.029               | 0.079               |
|     |       |        | CD8+   | 0   | CMV          | 2_of_3_IFNg_IL2_TNFa | 0.352               | 0.007               | 0.345               |
|     |       |        |        | 28  | CMV          | 2_of_3_IFNg_IL2_TNFa | 0.383               | 0.002               | 0.381               |
|     |       |        |        | 70  | CMV          | 2_of_3_IFNg_IL2_TNFa | 0.337               | 0.000               | 0.337               |
|     |       |        |        | 168 | CMV          | 2_of_3_IFNg_IL2_TNFa | 0.412               | 0.000               | 0.412               |
|     |       | 042063 | CD4+   | 70  | CMV          | 2_of_3_IFNg_IL2_TNFa | 0.123               | 0.052               | 0.071               |

**Unreliable samples are excluded.**

**Records are excluded if the number of T-cell subsets is < 1,000**

**These criteria are applied separately to CD4+ and CD8+ subsets.**

**HVTN 602 / AERAS A-042: A randomized, placebo-controlled, partially blinded phase 1b clinical trial to evaluate the safety and immunogenicity of BCG revaccination, H4:IC31, and H56:IC31 in healthy, HIV-1-uninfected adolescent participants**

**Lab PT Report**

**Data as of February 5, 2018**

**Table 4**

**Listing of Positive ICS Responses Using MIMOSA**

| Lab | Group | Pub ID | T cell | Day | Peptide Pool | Cytokine             | % Cytokine Response | % Response Neg Ctrl | % Response Bkgd Adj |
|-----|-------|--------|--------|-----|--------------|----------------------|---------------------|---------------------|---------------------|
|     |       |        | CD8+   | 28  | CMV          | 2_of_3_IFNg_IL2_TNFa | 1.704               | 0.003               | 1.701               |
|     |       |        |        | 70  | CMV          | 2_of_3_IFNg_IL2_TNFa | 2.350               | 0.005               | 2.345               |
|     |       | 042065 | CD4+   | 0   | CMV          | 2_of_3_IFNg_IL2_TNFa | 0.089               | 0.009               | 0.080               |
|     |       |        |        | 28  | CMV          | 2_of_3_IFNg_IL2_TNFa | 0.094               | 0.019               | 0.075               |
|     |       |        |        | 168 | CMV          | 2_of_3_IFNg_IL2_TNFa | 0.074               | 0.005               | 0.069               |
|     |       |        | CD8+   | 0   | CMV          | 2_of_3_IFNg_IL2_TNFa | 0.990               | 0.004               | 0.986               |
|     |       |        |        | 28  | CMV          | 2_of_3_IFNg_IL2_TNFa | 1.315               | 0.002               | 1.314               |
|     |       |        |        | 168 | CMV          | 2_of_3_IFNg_IL2_TNFa | 0.695               | 0.004               | 0.691               |
|     |       | 042066 | CD4+   | 0   | CMV          | 2_of_3_IFNg_IL2_TNFa | 0.221               | 0.063               | 0.157               |
|     |       |        |        | 28  | CMV          | 2_of_3_IFNg_IL2_TNFa | 0.266               | 0.026               | 0.240               |
|     |       |        |        | 70  | CMV          | 2_of_3_IFNg_IL2_TNFa | 0.263               | 0.060               | 0.204               |
|     |       |        |        | 168 | CMV          | 2_of_3_IFNg_IL2_TNFa | 0.276               | 0.039               | 0.238               |
|     |       | 042067 | CD4+   | 0   | CMV          | 2_of_3_IFNg_IL2_TNFa | 0.509               | 0.014               | 0.495               |
|     |       |        |        | 28  | CMV          | 2_of_3_IFNg_IL2_TNFa | 0.302               | 0.013               | 0.289               |
|     |       |        |        | 168 | CMV          | 2_of_3_IFNg_IL2_TNFa | 0.312               | 0.020               | 0.292               |
|     |       |        | CD8+   | 0   | CMV          | 2_of_3_IFNg_IL2_TNFa | 3.302               | 0.009               | 3.293               |
|     |       |        |        | 28  | CMV          | 2_of_3_IFNg_IL2_TNFa | 1.760               | 0.000               | 1.760               |
|     |       |        |        | 168 | CMV          | 2_of_3_IFNg_IL2_TNFa | 1.644               | 0.000               | 1.644               |
|     |       | 042069 | CD4+   | 0   | CMV          | 2_of_3_IFNg_IL2_TNFa | 0.073               | 0.009               | 0.063               |
|     |       |        |        | 28  | CMV          | 2_of_3_IFNg_IL2_TNFa | 0.101               | 0.007               | 0.093               |
|     |       |        |        | 168 | CMV          | 2_of_3_IFNg_IL2_TNFa | 0.155               | 0.007               | 0.149               |

**Unreliable samples are excluded.**

**Records are excluded if the number of T-cell subsets is < 1,000**

**These criteria are applied separately to CD4+ and CD8+ subsets.**

**HVTN 602 / AERAS A-042: A randomized, placebo-controlled, partially blinded phase 1b clinical trial to evaluate the safety and immunogenicity of BCG revaccination, H4:IC31, and H56:IC31 in healthy, HIV-1-uninfected adolescent participants**

**Lab PT Report**

Data as of February 5, 2018

**Table 4**

**Listing of Positive ICS Responses Using MIMOSA**

| Lab | Group   | Pub ID | T cell | Day | Peptide Pool | Cytokine             | % Cytokine Response | % Response Neg Ctrl | % Response Bkgd Adj |
|-----|---------|--------|--------|-----|--------------|----------------------|---------------------|---------------------|---------------------|
|     |         |        | CD8+   | 0   | CMV          | 2_of_3_IFNg_IL2_TNFa | 1.046               | 0.006               | 1.039               |
|     |         |        |        | 28  | CMV          | 2_of_3_IFNg_IL2_TNFa | 1.323               | 0.003               | 1.321               |
|     |         |        |        | 168 | CMV          | 2_of_3_IFNg_IL2_TNFa | 1.491               | 0.002               | 1.489               |
|     |         | 042077 | CD4+   | 0   | CMV          | 2_of_3_IFNg_IL2_TNFa | 3.658               | 0.062               | 3.595               |
|     |         |        |        | 28  | CMV          | 2_of_3_IFNg_IL2_TNFa | 5.197               | 0.058               | 5.139               |
|     |         |        | CD8+   | 0   | CMV          | 2_of_3_IFNg_IL2_TNFa | 0.683               | 0.003               | 0.680               |
|     |         |        |        | 28  | CMV          | 2_of_3_IFNg_IL2_TNFa | 0.842               | 0.002               | 0.840               |
|     |         | 042078 | CD4+   | 28  | CMV          | 2_of_3_IFNg_IL2_TNFa | 0.456               | 0.103               | 0.353               |
|     |         |        |        | 70  | CMV          | 2_of_3_IFNg_IL2_TNFa | 0.313               | 0.082               | 0.231               |
|     |         |        |        | 168 | CMV          | 2_of_3_IFNg_IL2_TNFa | 0.314               | 0.073               | 0.241               |
|     |         |        | CD8+   | 0   | CMV          | 2_of_3_IFNg_IL2_TNFa | 2.392               | 0.007               | 2.385               |
|     |         |        |        | 28  | CMV          | 2_of_3_IFNg_IL2_TNFa | 0.084               | 0.009               | 0.076               |
|     |         |        |        | 168 | CMV          | 2_of_3_IFNg_IL2_TNFa | 0.054               | 0.006               | 0.047               |
|     |         | 042084 | CD4+   | 0   | CMV          | 2_of_3_IFNg_IL2_TNFa | 0.270               | 0.025               | 0.245               |
|     |         |        | CD8+   | 0   | CMV          | 2_of_3_IFNg_IL2_TNFa | 2.121               | 0.044               | 2.078               |
|     | H4:IC31 | 042003 | CD4+   | 168 | CMV          | 2_of_3_IFNg_IL2_TNFa | 0.062               | 0.026               | 0.037               |
|     |         |        | CD8+   | 168 | CMV          | 2_of_3_IFNg_IL2_TNFa | 2.568               | 0.004               | 2.564               |
|     |         | 042004 | CD4+   | 0   | CMV          | 2_of_3_IFNg_IL2_TNFa | 0.103               | 0.021               | 0.081               |
|     |         |        |        | 14  | CMV          | 2_of_3_IFNg_IL2_TNFa | 0.115               | 0.019               | 0.096               |
|     |         |        |        | 70  | CMV          | 2_of_3_IFNg_IL2_TNFa | 0.197               | 0.056               | 0.141               |
|     |         |        |        | 168 | CMV          | 2_of_3_IFNg_IL2_TNFa | 0.207               | 0.011               | 0.197               |

**Unreliable samples are excluded.**

**Records are excluded if the number of T-cell subsets is < 1,000**

**These criteria are applied separately to CD4+ and CD8+ subsets.**

**HVTN 602 / AERAS A-042: A randomized, placebo-controlled, partially blinded phase 1b clinical trial to evaluate the safety and immunogenicity of BCG revaccination, H4:IC31, and H56:IC31 in healthy, HIV-1-uninfected adolescent participants**

**Lab PT Report**

**Data as of February 5, 2018**

**Table 4**

**Listing of Positive ICS Responses Using MIMOSA**

| Lab | Group | Pub ID | T cell | Day | Peptide Pool | Cytokine             | % Cytokine Response | % Response Neg Ctrl | % Response Bkgd Adj |
|-----|-------|--------|--------|-----|--------------|----------------------|---------------------|---------------------|---------------------|
|     |       |        | CD8+   | 0   | CMV          | 2_of_3_IFNg_IL2_TNFa | 2.504               | 0.002               | 2.503               |
|     |       |        |        | 14  | CMV          | 2_of_3_IFNg_IL2_TNFa | 1.944               | 0.010               | 1.934               |
|     |       |        |        | 70  | CMV          | 2_of_3_IFNg_IL2_TNFa | 2.420               | 0.010               | 2.410               |
|     |       |        |        | 168 | CMV          | 2_of_3_IFNg_IL2_TNFa | 3.826               | 0.003               | 3.823               |
|     |       | 042006 | CD8+   | 0   | CMV          | 2_of_3_IFNg_IL2_TNFa | 0.540               | 0.015               | 0.525               |
|     |       |        |        | 14  | CMV          | 2_of_3_IFNg_IL2_TNFa | 0.412               | 0.008               | 0.404               |
|     |       |        |        | 70  | CMV          | 2_of_3_IFNg_IL2_TNFa | 0.634               | 0.011               | 0.624               |
|     |       |        |        | 168 | CMV          | 2_of_3_IFNg_IL2_TNFa | 0.594               | 0.010               | 0.584               |
|     |       | 042007 | CD8+   | 0   | CMV          | 2_of_3_IFNg_IL2_TNFa | 2.066               | 0.069               | 1.998               |
|     |       | 042008 | CD4+   | 70  | CMV          | 2_of_3_IFNg_IL2_TNFa | 0.064               | 0.015               | 0.049               |
|     |       |        | CD8+   | 0   | CMV          | 2_of_3_IFNg_IL2_TNFa | 0.044               | 0.000               | 0.044               |
|     |       |        |        | 14  | CMV          | 2_of_3_IFNg_IL2_TNFa | 0.113               | 0.003               | 0.110               |
|     |       |        |        | 70  | CMV          | 2_of_3_IFNg_IL2_TNFa | 0.104               | 0.004               | 0.099               |
|     |       | 042011 | CD4+   | 0   | CMV          | 2_of_3_IFNg_IL2_TNFa | 0.130               | 0.020               | 0.110               |
|     |       |        |        | 70  | CMV          | 2_of_3_IFNg_IL2_TNFa | 0.093               | 0.045               | 0.048               |
|     |       |        | CD8+   | 0   | CMV          | 2_of_3_IFNg_IL2_TNFa | 0.061               | 0.004               | 0.058               |
|     |       |        |        | 70  | CMV          | 2_of_3_IFNg_IL2_TNFa | 0.047               | 0.008               | 0.039               |
|     |       | 042012 | CD4+   | 0   | CMV          | 2_of_3_IFNg_IL2_TNFa | 0.109               | 0.031               | 0.078               |
|     |       |        |        | 14  | CMV          | 2_of_3_IFNg_IL2_TNFa | 0.109               | 0.027               | 0.082               |
|     |       |        |        | 168 | CMV          | 2_of_3_IFNg_IL2_TNFa | 0.185               | 0.031               | 0.155               |
|     |       | 042018 | CD8+   | 0   | CMV          | 2_of_3_IFNg_IL2_TNFa | 0.334               | 0.000               | 0.334               |

**Unreliable samples are excluded.**

**Records are excluded if the number of T-cell subsets is < 1,000**

**These criteria are applied separately to CD4+ and CD8+ subsets.**

**HVTN 602 / AERAS A-042: A randomized, placebo-controlled, partially blinded phase 1b clinical trial to evaluate the safety and immunogenicity of BCG revaccination, H4:IC31, and H56:IC31 in healthy, HIV-1-uninfected adolescent participants**

**Lab PT Report**

**Data as of February 5, 2018**

**Table 4**

**Listing of Positive ICS Responses Using MIMOSA**

| Lab | Group | Pub ID | T cell | Day | Peptide Pool | Cytokine             | % Cytokine Response | % Response Neg Ctrl | % Response Bkgd Adj |
|-----|-------|--------|--------|-----|--------------|----------------------|---------------------|---------------------|---------------------|
|     |       |        |        | 14  | CMV          | 2_of_3_IFNg_IL2_TNFa | 0.996               | 0.007               | 0.990               |
|     |       |        |        | 70  | CMV          | 2_of_3_IFNg_IL2_TNFa | 0.352               | 0.000               | 0.352               |
|     |       | 042021 | CD4+   | 0   | CMV          | 2_of_3_IFNg_IL2_TNFa | 0.141               | 0.043               | 0.098               |
|     |       |        |        | 14  | CMV          | 2_of_3_IFNg_IL2_TNFa | 0.163               | 0.050               | 0.113               |
|     |       |        |        | 70  | CMV          | 2_of_3_IFNg_IL2_TNFa | 0.139               | 0.064               | 0.075               |
|     |       |        | CD8+   | 0   | CMV          | 2_of_3_IFNg_IL2_TNFa | 0.040               | 0.002               | 0.037               |
|     |       |        |        | 14  | CMV          | 2_of_3_IFNg_IL2_TNFa | 0.043               | 0.002               | 0.040               |
|     |       | 042025 | CD4+   | 0   | CMV          | 2_of_3_IFNg_IL2_TNFa | 0.060               | 0.010               | 0.050               |
|     |       |        |        | 14  | CMV          | 2_of_3_IFNg_IL2_TNFa | 0.077               | 0.024               | 0.053               |
|     |       |        |        | 70  | CMV          | 2_of_3_IFNg_IL2_TNFa | 0.108               | 0.011               | 0.097               |
|     |       |        | CD8+   | 0   | CMV          | 2_of_3_IFNg_IL2_TNFa | 0.175               | 0.001               | 0.174               |
|     |       |        |        | 14  | CMV          | 2_of_3_IFNg_IL2_TNFa | 0.151               | 0.007               | 0.144               |
|     |       |        |        | 70  | CMV          | 2_of_3_IFNg_IL2_TNFa | 0.187               | 0.001               | 0.185               |
|     |       | 042032 | CD8+   | 0   | CMV          | 2_of_3_IFNg_IL2_TNFa | 0.785               | 0.003               | 0.782               |
|     |       |        |        | 14  | CMV          | 2_of_3_IFNg_IL2_TNFa | 0.983               | 0.006               | 0.977               |
|     |       |        |        | 70  | CMV          | 2_of_3_IFNg_IL2_TNFa | 0.664               | 0.009               | 0.655               |
|     |       |        |        | 168 | CMV          | 2_of_3_IFNg_IL2_TNFa | 0.828               | 0.003               | 0.825               |
|     |       | 042036 | CD4+   | 168 | CMV          | 2_of_3_IFNg_IL2_TNFa | 0.069               | 0.031               | 0.038               |
|     |       |        | CD8+   | 0   | CMV          | 2_of_3_IFNg_IL2_TNFa | 0.307               | 0.004               | 0.303               |
|     |       |        |        | 168 | CMV          | 2_of_3_IFNg_IL2_TNFa | 0.290               | 0.005               | 0.285               |
|     |       | 042037 | CD4+   | 14  | CMV          | 2_of_3_IFNg_IL2_TNFa | 0.453               | 0.041               | 0.412               |

**Unreliable samples are excluded.**

**Records are excluded if the number of T-cell subsets is < 1,000**

**These criteria are applied separately to CD4+ and CD8+ subsets.**

**HVTN 602 / AERAS A-042: A randomized, placebo-controlled, partially blinded phase 1b clinical trial to evaluate the safety and immunogenicity of BCG revaccination, H4:IC31, and H56:IC31 in healthy, HIV-1-uninfected adolescent participants**

**Lab PT Report**

**Data as of February 5, 2018**

**Table 4**

**Listing of Positive ICS Responses Using MIMOSA**

| Lab | Group | Pub ID | T cell | Day | Peptide Pool | Cytokine             | % Cytokine Response | % Response Neg Ctrl | % Response Bkgd Adj |
|-----|-------|--------|--------|-----|--------------|----------------------|---------------------|---------------------|---------------------|
|     |       |        | CD8+   | 0   | CMV          | 2_of_3_IFNg_IL2_TNFa | 0.825               | 0.000               | 0.825               |
|     |       |        |        | 14  | CMV          | 2_of_3_IFNg_IL2_TNFa | 2.588               | 0.005               | 2.583               |
|     |       |        |        | 70  | CMV          | 2_of_3_IFNg_IL2_TNFa | 1.000               | 0.013               | 0.987               |
|     |       | 042041 | CD4+   | 0   | CMV          | 2_of_3_IFNg_IL2_TNFa | 0.069               | 0.024               | 0.045               |
|     |       |        |        | 14  | CMV          | 2_of_3_IFNg_IL2_TNFa | 0.112               | 0.057               | 0.055               |
|     |       |        |        | 168 | CMV          | 2_of_3_IFNg_IL2_TNFa | 0.137               | 0.033               | 0.104               |
|     |       |        | CD8+   | 0   | CMV          | 2_of_3_IFNg_IL2_TNFa | 0.311               | 0.003               | 0.308               |
|     |       |        |        | 14  | CMV          | 2_of_3_IFNg_IL2_TNFa | 0.459               | 0.011               | 0.448               |
|     |       |        |        | 168 | CMV          | 2_of_3_IFNg_IL2_TNFa | 0.722               | 0.005               | 0.717               |
|     |       | 042047 | CD4+   | 14  | CMV          | 2_of_3_IFNg_IL2_TNFa | 0.754               | 0.035               | 0.719               |
|     |       |        |        | 168 | CMV          | 2_of_3_IFNg_IL2_TNFa | 0.526               | 0.018               | 0.508               |
|     |       |        | CD8+   | 14  | CMV          | 2_of_3_IFNg_IL2_TNFa | 0.049               | 0.006               | 0.043               |
|     |       |        |        | 168 | CMV          | 2_of_3_IFNg_IL2_TNFa | 0.057               | 0.002               | 0.055               |
|     |       | 042049 | CD4+   | 0   | CMV          | 2_of_3_IFNg_IL2_TNFa | 0.526               | 0.020               | 0.506               |
|     |       |        |        | 14  | CMV          | 2_of_3_IFNg_IL2_TNFa | 0.460               | 0.055               | 0.405               |
|     |       |        |        | 70  | CMV          | 2_of_3_IFNg_IL2_TNFa | 0.509               | 0.016               | 0.492               |
|     |       |        |        | 168 | CMV          | 2_of_3_IFNg_IL2_TNFa | 0.757               | 0.048               | 0.710               |
|     |       |        | CD8+   | 0   | CMV          | 2_of_3_IFNg_IL2_TNFa | 1.248               | 0.000               | 1.248               |
|     |       |        |        | 14  | CMV          | 2_of_3_IFNg_IL2_TNFa | 1.046               | 0.000               | 1.046               |
|     |       |        |        | 70  | CMV          | 2_of_3_IFNg_IL2_TNFa | 1.293               | 0.002               | 1.291               |
|     |       |        |        | 168 | CMV          | 2_of_3_IFNg_IL2_TNFa | 1.670               | 0.000               | 1.670               |

**Unreliable samples are excluded.**

**Records are excluded if the number of T-cell subsets is < 1,000**

**These criteria are applied separately to CD4+ and CD8+ subsets.**



**HVTN 602 / AERAS A-042: A randomized, placebo-controlled, partially blinded phase 1b clinical trial to evaluate the safety and immunogenicity of BCG revaccination, H4:IC31, and H56:IC31 in healthy, HIV-1-uninfected adolescent participants**

**Lab PT Report**

**Data as of February 5, 2018**

**Table 4**

**Listing of Positive ICS Responses Using MIMOSA**

| Lab | Group | Pub ID | T cell | Day | Peptide Pool | Cytokine             | % Cytokine Response | % Response Neg Ctrl | % Response Bkgd Adj |
|-----|-------|--------|--------|-----|--------------|----------------------|---------------------|---------------------|---------------------|
|     |       | 042050 | CD4+   | 0   | CMV          | 2_of_3_IFNg_IL2_TNFa | 0.085               | 0.023               | 0.062               |
|     |       |        |        | 14  | CMV          | 2_of_3_IFNg_IL2_TNFa | 0.115               | 0.012               | 0.103               |
|     |       |        |        | 70  | CMV          | 2_of_3_IFNg_IL2_TNFa | 0.074               | 0.016               | 0.059               |
|     |       |        |        | 168 | CMV          | 2_of_3_IFNg_IL2_TNFa | 0.069               | 0.009               | 0.060               |
|     |       |        | CD8+   | 0   | CMV          | 2_of_3_IFNg_IL2_TNFa | 0.354               | 0.000               | 0.354               |
|     |       |        |        | 14  | CMV          | 2_of_3_IFNg_IL2_TNFa | 0.377               | 0.000               | 0.377               |
|     |       |        |        | 70  | CMV          | 2_of_3_IFNg_IL2_TNFa | 0.320               | 0.000               | 0.320               |
|     |       |        |        | 168 | CMV          | 2_of_3_IFNg_IL2_TNFa | 0.219               | 0.000               | 0.219               |
|     |       | 042052 | CD4+   | 0   | CMV          | 2_of_3_IFNg_IL2_TNFa | 0.149               | 0.008               | 0.141               |
|     |       |        |        | 14  | CMV          | 2_of_3_IFNg_IL2_TNFa | 0.338               | 0.026               | 0.312               |
|     |       |        |        | 168 | CMV          | 2_of_3_IFNg_IL2_TNFa | 0.147               | 0.014               | 0.133               |
|     |       |        | CD8+   | 0   | CMV          | 2_of_3_IFNg_IL2_TNFa | 0.438               | 0.007               | 0.431               |
|     |       |        |        | 14  | CMV          | 2_of_3_IFNg_IL2_TNFa | 0.837               | 0.005               | 0.832               |
|     |       |        |        | 168 | CMV          | 2_of_3_IFNg_IL2_TNFa | 0.397               | 0.000               | 0.397               |
|     |       | 042055 | CD4+   | 0   | CMV          | 2_of_3_IFNg_IL2_TNFa | 0.244               | 0.039               | 0.205               |
|     |       |        |        | 14  | CMV          | 2_of_3_IFNg_IL2_TNFa | 0.302               | 0.087               | 0.215               |
|     |       |        |        | 70  | CMV          | 2_of_3_IFNg_IL2_TNFa | 0.293               | 0.027               | 0.266               |
|     |       |        |        | 168 | CMV          | 2_of_3_IFNg_IL2_TNFa | 0.425               | 0.015               | 0.410               |
|     |       |        | CD8+   | 0   | CMV          | 2_of_3_IFNg_IL2_TNFa | 0.786               | 0.005               | 0.781               |
|     |       |        |        | 14  | CMV          | 2_of_3_IFNg_IL2_TNFa | 1.287               | 0.000               | 1.287               |
|     |       |        |        | 70  | CMV          | 2_of_3_IFNg_IL2_TNFa | 1.517               | 0.000               | 1.517               |

**Unreliable samples are excluded.**

**Records are excluded if the number of T-cell subsets is < 1,000**

**These criteria are applied separately to CD4+ and CD8+ subsets.**

**HVTN 602 / AERAS A-042: A randomized, placebo-controlled, partially blinded phase 1b clinical trial to evaluate the safety and immunogenicity of BCG revaccination, H4:IC31, and H56:IC31 in healthy, HIV-1-uninfected adolescent participants**

**Lab PT Report**

**Data as of February 5, 2018**

**Table 4**

**Listing of Positive ICS Responses Using MIMOSA**

| Lab | Group | Pub ID | T cell | Day | Peptide Pool | Cytokine             | % Cytokine Response | % Response Neg Ctrl | % Response Bkgd Adj |
|-----|-------|--------|--------|-----|--------------|----------------------|---------------------|---------------------|---------------------|
|     |       |        |        | 168 | CMV          | 2_of_3_IFNg_IL2_TNFa | 2.119               | 0.002               | 2.117               |
|     |       | 042057 | CD4+   | 0   | CMV          | 2_of_3_IFNg_IL2_TNFa | 0.094               | 0.040               | 0.054               |
|     |       |        |        | 14  | CMV          | 2_of_3_IFNg_IL2_TNFa | 0.129               | 0.034               | 0.095               |
|     |       | 042059 | CD4+   | 168 | CMV          | 2_of_3_IFNg_IL2_TNFa | 0.058               | 0.025               | 0.033               |
|     |       |        | CD8+   | 0   | CMV          | 2_of_3_IFNg_IL2_TNFa | 1.744               | 0.006               | 1.738               |
|     |       |        |        | 14  | CMV          | 2_of_3_IFNg_IL2_TNFa | 1.512               | 0.004               | 1.508               |
|     |       |        |        | 70  | CMV          | 2_of_3_IFNg_IL2_TNFa | 1.342               | 0.007               | 1.335               |
|     |       |        |        | 168 | CMV          | 2_of_3_IFNg_IL2_TNFa | 1.462               | 0.007               | 1.455               |
|     |       | 042074 | CD4+   | 14  | CMV          | 2_of_3_IFNg_IL2_TNFa | 0.033               | 0.009               | 0.024               |
|     |       |        | CD8+   | 0   | CMV          | 2_of_3_IFNg_IL2_TNFa | 0.399               | 0.003               | 0.396               |
|     |       |        |        | 14  | CMV          | 2_of_3_IFNg_IL2_TNFa | 0.407               | 0.000               | 0.407               |
|     |       |        |        | 70  | CMV          | 2_of_3_IFNg_IL2_TNFa | 0.370               | 0.002               | 0.368               |
|     |       |        |        | 168 | CMV          | 2_of_3_IFNg_IL2_TNFa | 0.373               | 0.000               | 0.373               |
|     |       | 042076 | CD4+   | 0   | CMV          | 2_of_3_IFNg_IL2_TNFa | 0.057               | 0.016               | 0.041               |
|     |       |        |        | 14  | CMV          | 2_of_3_IFNg_IL2_TNFa | 0.078               | 0.022               | 0.056               |
|     |       |        |        | 70  | CMV          | 2_of_3_IFNg_IL2_TNFa | 0.113               | 0.057               | 0.056               |
|     |       |        |        | 168 | CMV          | 2_of_3_IFNg_IL2_TNFa | 0.117               | 0.028               | 0.089               |
|     |       |        | CD8+   | 14  | CMV          | 2_of_3_IFNg_IL2_TNFa | 0.059               | 0.008               | 0.050               |
|     |       |        |        | 70  | CMV          | 2_of_3_IFNg_IL2_TNFa | 0.075               | 0.010               | 0.065               |
|     |       |        |        | 168 | CMV          | 2_of_3_IFNg_IL2_TNFa | 0.063               | 0.004               | 0.060               |
|     |       | 042082 | CD4+   | 0   | CMV          | 2_of_3_IFNg_IL2_TNFa | 0.099               | 0.027               | 0.072               |

**Unreliable samples are excluded.**

**Records are excluded if the number of T-cell subsets is < 1,000**

**These criteria are applied separately to CD4+ and CD8+ subsets.**

**HVTN 602 / AERAS A-042: A randomized, placebo-controlled, partially blinded phase 1b clinical trial to evaluate the safety and immunogenicity of BCG revaccination, H4:IC31, and H56:IC31 in healthy, HIV-1-uninfected adolescent participants**

**Lab PT Report**

**Data as of February 5, 2018**

**Table 4**

**Listing of Positive ICS Responses Using MIMOSA**

| Lab      | Group | Pub ID | T cell | Day | Peptide Pool | Cytokine             | % Cytokine Response | % Response Neg Ctrl | % Response Bkgd Adj |
|----------|-------|--------|--------|-----|--------------|----------------------|---------------------|---------------------|---------------------|
|          |       |        |        | 14  | CMV          | 2_of_3_IFNg_IL2_TNFa | 0.101               | 0.022               | 0.079               |
|          |       |        |        | 168 | CMV          | 2_of_3_IFNg_IL2_TNFa | 0.132               | 0.021               | 0.111               |
|          |       |        | CD8+   | 0   | CMV          | 2_of_3_IFNg_IL2_TNFa | 0.250               | 0.007               | 0.242               |
|          |       |        |        | 14  | CMV          | 2_of_3_IFNg_IL2_TNFa | 0.207               | 0.002               | 0.205               |
|          |       |        |        | 70  | CMV          | 2_of_3_IFNg_IL2_TNFa | 0.166               | 0.012               | 0.153               |
|          |       |        |        | 168 | CMV          | 2_of_3_IFNg_IL2_TNFa | 0.197               | 0.007               | 0.190               |
| H56:IC31 |       | 042001 | CD8+   | 0   | CMV          | 2_of_3_IFNg_IL2_TNFa | 1.484               | 0.000               | 1.484               |
|          |       |        |        | 14  | CMV          | 2_of_3_IFNg_IL2_TNFa | 1.425               | 0.004               | 1.421               |
|          |       | 042010 | CD4+   | 14  | CMV          | 2_of_3_IFNg_IL2_TNFa | 0.028               | 0.001               | 0.027               |
|          |       |        |        | 70  | CMV          | 2_of_3_IFNg_IL2_TNFa | 0.033               | 0.003               | 0.030               |
|          |       |        | CD8+   | 0   | CMV          | 2_of_3_IFNg_IL2_TNFa | 0.987               | 0.000               | 0.987               |
|          |       |        |        | 14  | CMV          | 2_of_3_IFNg_IL2_TNFa | 0.781               | 0.000               | 0.781               |
|          |       |        |        | 70  | CMV          | 2_of_3_IFNg_IL2_TNFa | 1.035               | 0.008               | 1.028               |
|          |       | 042013 | CD4+   | 0   | CMV          | 2_of_3_IFNg_IL2_TNFa | 0.240               | 0.016               | 0.224               |
|          |       |        |        | 14  | CMV          | 2_of_3_IFNg_IL2_TNFa | 0.406               | 0.005               | 0.401               |
|          |       |        |        | 70  | CMV          | 2_of_3_IFNg_IL2_TNFa | 0.452               | 0.011               | 0.441               |
|          |       |        |        | 168 | CMV          | 2_of_3_IFNg_IL2_TNFa | 0.295               | 0.008               | 0.286               |
|          |       |        | CD8+   | 0   | CMV          | 2_of_3_IFNg_IL2_TNFa | 2.506               | 0.007               | 2.498               |
|          |       |        |        | 14  | CMV          | 2_of_3_IFNg_IL2_TNFa | 2.988               | 0.000               | 2.988               |
|          |       |        |        | 70  | CMV          | 2_of_3_IFNg_IL2_TNFa | 3.073               | 0.006               | 3.068               |
|          |       |        |        | 168 | CMV          | 2_of_3_IFNg_IL2_TNFa | 2.123               | 0.000               | 2.123               |

**Unreliable samples are excluded.**

**Records are excluded if the number of T-cell subsets is < 1,000**

**These criteria are applied separately to CD4+ and CD8+ subsets.**

**HVTN 602 / AERAS A-042: A randomized, placebo-controlled, partially blinded phase 1b clinical trial to evaluate the safety and immunogenicity of BCG revaccination, H4:IC31, and H56:IC31 in healthy, HIV-1-uninfected adolescent participants**

**Lab PT Report**

**Data as of February 5, 2018**

**Table 4**

**Listing of Positive ICS Responses Using MIMOSA**

| Lab | Group | Pub ID | T cell | Day | Peptide Pool | Cytokine             | % Cytokine Response | % Response Neg Ctrl | % Response Bkgd Adj |
|-----|-------|--------|--------|-----|--------------|----------------------|---------------------|---------------------|---------------------|
|     |       | 042014 | CD4+   | 14  | CMV          | 2_of_3_IFNg_IL2_TNFa | 0.202               | 0.011               | 0.191               |
|     |       |        |        | 168 | CMV          | 2_of_3_IFNg_IL2_TNFa | 0.306               | 0.007               | 0.299               |
|     |       |        | CD8+   | 14  | CMV          | 2_of_3_IFNg_IL2_TNFa | 3.412               | 0.003               | 3.409               |
|     |       |        |        | 168 | CMV          | 2_of_3_IFNg_IL2_TNFa | 5.174               | 0.003               | 5.171               |
|     |       | 042015 | CD4+   | 14  | CMV          | 2_of_3_IFNg_IL2_TNFa | 0.126               | 0.045               | 0.081               |
|     |       |        |        | 70  | CMV          | 2_of_3_IFNg_IL2_TNFa | 0.085               | 0.030               | 0.055               |
|     |       |        |        | 168 | CMV          | 2_of_3_IFNg_IL2_TNFa | 0.134               | 0.041               | 0.093               |
|     |       |        | CD8+   | 14  | CMV          | 2_of_3_IFNg_IL2_TNFa | 0.508               | 0.003               | 0.505               |
|     |       |        |        | 70  | CMV          | 2_of_3_IFNg_IL2_TNFa | 0.713               | 0.000               | 0.713               |
|     |       |        |        | 168 | CMV          | 2_of_3_IFNg_IL2_TNFa | 0.638               | 0.005               | 0.633               |
|     |       | 042020 | CD4+   | 0   | CMV          | 2_of_3_IFNg_IL2_TNFa | 0.190               | 0.019               | 0.171               |
|     |       |        | CD8+   | 0   | CMV          | 2_of_3_IFNg_IL2_TNFa | 0.500               | 0.010               | 0.491               |
|     |       | 042023 | CD4+   | 0   | CMV          | 2_of_3_IFNg_IL2_TNFa | 0.154               | 0.015               | 0.140               |
|     |       |        |        | 14  | CMV          | 2_of_3_IFNg_IL2_TNFa | 0.114               | 0.016               | 0.098               |
|     |       |        | CD8+   | 0   | CMV          | 2_of_3_IFNg_IL2_TNFa | 1.919               | 0.002               | 1.917               |
|     |       |        |        | 14  | CMV          | 2_of_3_IFNg_IL2_TNFa | 1.887               | 0.004               | 1.883               |
|     |       | 042024 | CD4+   | 0   | CMV          | 2_of_3_IFNg_IL2_TNFa | 0.139               | 0.014               | 0.125               |
|     |       |        |        | 14  | CMV          | 2_of_3_IFNg_IL2_TNFa | 0.282               | 0.019               | 0.263               |
|     |       |        | CD8+   | 0   | CMV          | 2_of_3_IFNg_IL2_TNFa | 0.443               | 0.009               | 0.435               |
|     |       |        |        | 14  | CMV          | 2_of_3_IFNg_IL2_TNFa | 0.515               | 0.010               | 0.506               |
|     |       | 042028 | CD4+   | 14  | CMV          | 2_of_3_IFNg_IL2_TNFa | 0.089               | 0.017               | 0.072               |

**Unreliable samples are excluded.**

**Records are excluded if the number of T-cell subsets is < 1,000**

**These criteria are applied separately to CD4+ and CD8+ subsets.**

**HVTN 602 / AERAS A-042: A randomized, placebo-controlled, partially blinded phase 1b clinical trial to evaluate the safety and immunogenicity of BCG revaccination, H4:IC31, and H56:IC31 in healthy, HIV-1-uninfected adolescent participants**

**Lab PT Report**

**Data as of February 5, 2018**

**Table 4**

**Listing of Positive ICS Responses Using MIMOSA**

| Lab | Group | Pub ID | T cell | Day | Peptide Pool | Cytokine             | % Cytokine Response | % Response Neg Ctrl | % Response Bkgd Adj |
|-----|-------|--------|--------|-----|--------------|----------------------|---------------------|---------------------|---------------------|
|     |       |        |        | 168 | CMV          | 2_of_3_IFNg_IL2_TNFa | 0.058               | 0.012               | 0.046               |
|     |       |        | CD8+   | 0   | CMV          | 2_of_3_IFNg_IL2_TNFa | 0.538               | 0.002               | 0.536               |
|     |       |        |        | 14  | CMV          | 2_of_3_IFNg_IL2_TNFa | 0.480               | 0.004               | 0.476               |
|     |       |        |        | 70  | CMV          | 2_of_3_IFNg_IL2_TNFa | 0.425               | 0.002               | 0.423               |
|     |       |        |        | 168 | CMV          | 2_of_3_IFNg_IL2_TNFa | 0.489               | 0.000               | 0.489               |
|     |       | 042034 | CD4+   | 70  | CMV          | 2_of_3_IFNg_IL2_TNFa | 0.026               | 0.006               | 0.020               |
|     |       |        | CD8+   | 0   | CMV          | 2_of_3_IFNg_IL2_TNFa | 0.115               | 0.000               | 0.115               |
|     |       |        |        | 14  | CMV          | 2_of_3_IFNg_IL2_TNFa | 0.522               | 0.004               | 0.517               |
|     |       |        |        | 70  | CMV          | 2_of_3_IFNg_IL2_TNFa | 0.440               | 0.010               | 0.431               |
|     |       | 042039 | CD4+   | 0   | CMV          | 2_of_3_IFNg_IL2_TNFa | 0.114               | 0.001               | 0.112               |
|     |       |        | CD8+   | 0   | CMV          | 2_of_3_IFNg_IL2_TNFa | 0.394               | 0.000               | 0.394               |
|     |       |        |        | 14  | CMV          | 2_of_3_IFNg_IL2_TNFa | 0.296               | 0.013               | 0.283               |
|     |       |        |        | 70  | CMV          | 2_of_3_IFNg_IL2_TNFa | 0.233               | 0.000               | 0.233               |
|     |       | 042040 | CD8+   | 0   | CMV          | 2_of_3_IFNg_IL2_TNFa | 0.118               | 0.011               | 0.107               |
|     |       |        |        | 14  | CMV          | 2_of_3_IFNg_IL2_TNFa | 0.105               | 0.014               | 0.091               |
|     |       | 042042 | CD4+   | 14  | CMV          | 2_of_3_IFNg_IL2_TNFa | 0.324               | 0.048               | 0.276               |
|     |       |        |        | 168 | CMV          | 2_of_3_IFNg_IL2_TNFa | 0.748               | 0.059               | 0.689               |
|     |       |        | CD8+   | 14  | CMV          | 2_of_3_IFNg_IL2_TNFa | 0.211               | 0.017               | 0.193               |
|     |       |        |        | 168 | CMV          | 2_of_3_IFNg_IL2_TNFa | 0.330               | 0.010               | 0.320               |
|     |       | 042044 | CD4+   | 0   | CMV          | 2_of_3_IFNg_IL2_TNFa | 0.365               | 0.007               | 0.357               |
|     |       |        |        | 70  | CMV          | 2_of_3_IFNg_IL2_TNFa | 0.318               | 0.010               | 0.308               |

**Unreliable samples are excluded.**

**Records are excluded if the number of T-cell subsets is < 1,000**

**These criteria are applied separately to CD4+ and CD8+ subsets.**

**HVTN 602 / AERAS A-042: A randomized, placebo-controlled, partially blinded phase 1b clinical trial to evaluate the safety and immunogenicity of BCG revaccination, H4:IC31, and H56:IC31 in healthy, HIV-1-uninfected adolescent participants**

**Lab PT Report**

**Data as of February 5, 2018**

**Table 4**

**Listing of Positive ICS Responses Using MIMOSA**

| Lab | Group | Pub ID | T cell | Day | Peptide Pool | Cytokine             | % Cytokine Response | % Response Neg Ctrl | % Response Bkgd Adj |
|-----|-------|--------|--------|-----|--------------|----------------------|---------------------|---------------------|---------------------|
|     |       |        | CD8+   | 0   | CMV          | 2_of_3_IFNg_IL2_TNFa | 0.117               | 0.000               | 0.117               |
|     |       |        |        | 70  | CMV          | 2_of_3_IFNg_IL2_TNFa | 0.080               | 0.000               | 0.080               |
|     |       | 042046 | CD4+   | 14  | CMV          | 2_of_3_IFNg_IL2_TNFa | 0.102               | 0.019               | 0.083               |
|     |       |        |        | 70  | CMV          | 2_of_3_IFNg_IL2_TNFa | 0.064               | 0.014               | 0.050               |
|     |       |        |        | 168 | CMV          | 2_of_3_IFNg_IL2_TNFa | 0.088               | 0.025               | 0.063               |
|     |       |        | CD8+   | 0   | CMV          | 2_of_3_IFNg_IL2_TNFa | 0.966               | 0.010               | 0.956               |
|     |       |        |        | 14  | CMV          | 2_of_3_IFNg_IL2_TNFa | 1.136               | 0.000               | 1.136               |
|     |       |        |        | 70  | CMV          | 2_of_3_IFNg_IL2_TNFa | 0.576               | 0.000               | 0.576               |
|     |       |        |        | 168 | CMV          | 2_of_3_IFNg_IL2_TNFa | 0.826               | 0.000               | 0.826               |
|     |       | 042048 | CD4+   | 14  | CMV          | 2_of_3_IFNg_IL2_TNFa | 0.184               | 0.019               | 0.165               |
|     |       |        |        | 70  | CMV          | 2_of_3_IFNg_IL2_TNFa | 0.134               | 0.055               | 0.078               |
|     |       |        | CD8+   | 14  | CMV          | 2_of_3_IFNg_IL2_TNFa | 3.732               | 0.003               | 3.729               |
|     |       |        |        | 70  | CMV          | 2_of_3_IFNg_IL2_TNFa | 3.891               | 0.010               | 3.881               |
|     |       | 042061 | CD4+   | 0   | CMV          | 2_of_3_IFNg_IL2_TNFa | 0.066               | 0.015               | 0.051               |
|     |       |        | CD8+   | 0   | CMV          | 2_of_3_IFNg_IL2_TNFa | 0.625               | 0.001               | 0.624               |
|     |       |        |        | 14  | CMV          | 2_of_3_IFNg_IL2_TNFa | 0.590               | 0.004               | 0.585               |
|     |       | 042068 | CD4+   | 0   | CMV          | 2_of_3_IFNg_IL2_TNFa | 0.102               | 0.028               | 0.074               |
|     |       |        |        | 14  | CMV          | 2_of_3_IFNg_IL2_TNFa | 0.133               | 0.018               | 0.115               |
|     |       |        |        | 70  | CMV          | 2_of_3_IFNg_IL2_TNFa | 0.167               | 0.004               | 0.163               |
|     |       |        |        | 168 | CMV          | 2_of_3_IFNg_IL2_TNFa | 0.113               | 0.028               | 0.085               |
|     |       |        | CD8+   | 0   | CMV          | 2_of_3_IFNg_IL2_TNFa | 1.039               | 0.004               | 1.035               |

**Unreliable samples are excluded.**

**Records are excluded if the number of T-cell subsets is < 1,000**

**These criteria are applied separately to CD4+ and CD8+ subsets.**

**HVTN 602 / AERAS A-042: A randomized, placebo-controlled, partially blinded phase 1b clinical trial to evaluate the safety and immunogenicity of BCG revaccination, H4:IC31, and H56:IC31 in healthy, HIV-1-uninfected adolescent participants**

**Lab PT Report**

**Data as of February 5, 2018**

**Table 4**

**Listing of Positive ICS Responses Using MIMOSA**

| Lab | Group | Pub ID | T cell | Day | Peptide Pool | Cytokine             | % Cytokine Response | % Response Neg Ctrl | % Response Bkgd Adj |
|-----|-------|--------|--------|-----|--------------|----------------------|---------------------|---------------------|---------------------|
|     |       |        |        | 14  | CMV          | 2_of_3_IFNg_IL2_TNFa | 0.842               | 0.000               | 0.842               |
|     |       |        |        | 70  | CMV          | 2_of_3_IFNg_IL2_TNFa | 1.440               | 0.000               | 1.440               |
|     |       |        |        | 168 | CMV          | 2_of_3_IFNg_IL2_TNFa | 0.587               | 0.000               | 0.587               |
|     |       | 042071 | CD4+   | 0   | CMV          | 2_of_3_IFNg_IL2_TNFa | 0.213               | 0.030               | 0.183               |
|     |       |        |        | 14  | CMV          | 2_of_3_IFNg_IL2_TNFa | 0.214               | 0.025               | 0.189               |
|     |       |        |        | 70  | CMV          | 2_of_3_IFNg_IL2_TNFa | 0.152               | 0.015               | 0.137               |
|     |       |        |        | 168 | CMV          | 2_of_3_IFNg_IL2_TNFa | 0.184               | 0.016               | 0.168               |
|     |       |        | CD8+   | 0   | CMV          | 2_of_3_IFNg_IL2_TNFa | 0.050               | 0.000               | 0.050               |
|     |       |        |        | 14  | CMV          | 2_of_3_IFNg_IL2_TNFa | 0.097               | 0.003               | 0.094               |
|     |       |        |        | 168 | CMV          | 2_of_3_IFNg_IL2_TNFa | 0.070               | 0.000               | 0.070               |
|     |       | 042073 | CD8+   | 14  | CMV          | 2_of_3_IFNg_IL2_TNFa | 2.122               | 0.000               | 2.122               |
|     |       |        |        | 168 | CMV          | 2_of_3_IFNg_IL2_TNFa | 2.660               | 0.007               | 2.653               |
|     |       | 042079 | CD8+   | 0   | CMV          | 2_of_3_IFNg_IL2_TNFa | 1.257               | 0.001               | 1.256               |
|     |       |        |        | 14  | CMV          | 2_of_3_IFNg_IL2_TNFa | 1.184               | 0.003               | 1.181               |
|     |       |        |        | 70  | CMV          | 2_of_3_IFNg_IL2_TNFa | 1.383               | 0.002               | 1.381               |
|     |       |        |        | 168 | CMV          | 2_of_3_IFNg_IL2_TNFa | 2.080               | 0.004               | 2.076               |
|     |       | 042080 | CD4+   | 14  | CMV          | 2_of_3_IFNg_IL2_TNFa | 0.199               | 0.031               | 0.168               |
|     |       |        |        | 70  | CMV          | 2_of_3_IFNg_IL2_TNFa | 0.110               | 0.013               | 0.097               |
|     |       |        | CD8+   | 14  | CMV          | 2_of_3_IFNg_IL2_TNFa | 3.019               | 0.008               | 3.012               |
|     |       |        |        | 70  | CMV          | 2_of_3_IFNg_IL2_TNFa | 1.749               | 0.002               | 1.747               |
|     |       | 042081 | CD4+   | 168 | CMV          | 2_of_3_IFNg_IL2_TNFa | 0.060               | 0.027               | 0.033               |

**Unreliable samples are excluded.**

**Records are excluded if the number of T-cell subsets is < 1,000**

**These criteria are applied separately to CD4+ and CD8+ subsets.**

**HVTN 602 / AERAS A-042: A randomized, placebo-controlled, partially blinded phase 1b clinical trial to evaluate the safety and immunogenicity of BCG revaccination, H4:IC31, and H56:IC31 in healthy, HIV-1-uninfected adolescent participants**

**Lab PT Report**

**Data as of February 5, 2018**

**Table 4**

**Listing of Positive ICS Responses Using MIMOSA**

| Lab | Group   | Pub ID | T cell | Day | Peptide Pool | Cytokine             | % Cytokine Response | % Response Neg Ctrl | % Response Bkgd Adj |
|-----|---------|--------|--------|-----|--------------|----------------------|---------------------|---------------------|---------------------|
|     |         |        | CD8+   | 14  | CMV          | 2_of_3_IFNg_IL2_TNFa | 0.527               | 0.009               | 0.518               |
|     |         |        |        | 168 | CMV          | 2_of_3_IFNg_IL2_TNFa | 0.596               | 0.002               | 0.594               |
|     |         | 042083 | CD8+   | 0   | CMV          | 2_of_3_IFNg_IL2_TNFa | 1.876               | 0.006               | 1.869               |
|     |         |        |        | 14  | CMV          | 2_of_3_IFNg_IL2_TNFa | 1.701               | 0.006               | 1.695               |
|     |         |        |        | 168 | CMV          | 2_of_3_IFNg_IL2_TNFa | 2.001               | 0.004               | 1.997               |
|     | Placebo | 042009 | CD8+   | 14  | CMV          | 2_of_3_IFNg_IL2_TNFa | 0.908               | 0.004               | 0.905               |
|     |         |        |        | 168 | CMV          | 2_of_3_IFNg_IL2_TNFa | 1.276               | 0.006               | 1.270               |
|     |         | 042017 | CD4+   | 0   | CMV          | 2_of_3_IFNg_IL2_TNFa | 0.847               | 0.062               | 0.786               |
|     |         |        |        | 14  | CMV          | 2_of_3_IFNg_IL2_TNFa | 0.529               | 0.018               | 0.511               |
|     |         |        |        | 70  | CMV          | 2_of_3_IFNg_IL2_TNFa | 0.500               | 0.038               | 0.463               |
|     |         |        |        | 168 | CMV          | 2_of_3_IFNg_IL2_TNFa | 0.416               | 0.017               | 0.399               |
|     |         |        | CD8+   | 0   | CMV          | 2_of_3_IFNg_IL2_TNFa | 3.996               | 0.000               | 3.996               |
|     |         |        |        | 14  | CMV          | 2_of_3_IFNg_IL2_TNFa | 3.348               | 0.000               | 3.348               |
|     |         |        |        | 70  | CMV          | 2_of_3_IFNg_IL2_TNFa | 3.497               | 0.000               | 3.497               |
|     |         |        |        | 168 | CMV          | 2_of_3_IFNg_IL2_TNFa | 2.894               | 0.000               | 2.894               |
|     |         | 042019 | CD4+   | 0   | CMV          | 2_of_3_IFNg_IL2_TNFa | 0.152               | 0.025               | 0.127               |
|     |         |        |        | 14  | CMV          | 2_of_3_IFNg_IL2_TNFa | 0.119               | 0.007               | 0.111               |
|     |         |        |        | 70  | CMV          | 2_of_3_IFNg_IL2_TNFa | 0.146               | 0.035               | 0.110               |
|     |         |        | CD8+   | 0   | CMV          | 2_of_3_IFNg_IL2_TNFa | 1.369               | 0.004               | 1.364               |
|     |         |        |        | 14  | CMV          | 2_of_3_IFNg_IL2_TNFa | 0.818               | 0.000               | 0.818               |
|     |         |        |        | 70  | CMV          | 2_of_3_IFNg_IL2_TNFa | 1.099               | 0.005               | 1.093               |

**Unreliable samples are excluded.**

**Records are excluded if the number of T-cell subsets is < 1,000**

**These criteria are applied separately to CD4+ and CD8+ subsets.**



**HVTN 602 / AERAS A-042: A randomized, placebo-controlled, partially blinded phase 1b clinical trial to evaluate the safety and immunogenicity of BCG revaccination, H4:IC31, and H56:IC31 in healthy, HIV-1-uninfected adolescent participants**

**Lab PT Report**

**Data as of February 5, 2018**

**Table 4**

**Listing of Positive ICS Responses Using MIMOSA**

| Lab | Group | Pub ID | T cell | Day | Peptide Pool | Cytokine             | % Cytokine Response | % Response Neg Ctrl | % Response Bkgd Adj |
|-----|-------|--------|--------|-----|--------------|----------------------|---------------------|---------------------|---------------------|
|     |       | 042029 | CD4+   | 0   | CMV          | 2_of_3_IFNg_IL2_TNFa | 0.158               | 0.062               | 0.095               |
|     |       |        |        | 14  | CMV          | 2_of_3_IFNg_IL2_TNFa | 0.154               | 0.043               | 0.111               |
|     |       |        |        | 70  | CMV          | 2_of_3_IFNg_IL2_TNFa | 0.140               | 0.038               | 0.102               |
|     |       |        | CD8+   | 14  | CMV          | 2_of_3_IFNg_IL2_TNFa | 0.041               | 0.005               | 0.036               |
|     |       |        |        | 70  | CMV          | 2_of_3_IFNg_IL2_TNFa | 0.034               | 0.002               | 0.032               |
|     |       | 042033 | CD8+   | 0   | CMV          | 2_of_3_IFNg_IL2_TNFa | 2.311               | 0.007               | 2.304               |
|     |       |        |        | 14  | CMV          | 2_of_3_IFNg_IL2_TNFa | 2.735               | 0.001               | 2.734               |
|     |       |        |        | 70  | CMV          | 2_of_3_IFNg_IL2_TNFa | 2.654               | 0.003               | 2.651               |
|     |       |        |        | 168 | CMV          | 2_of_3_IFNg_IL2_TNFa | 2.413               | 0.004               | 2.409               |
|     |       | 042045 | CD4+   | 168 | CMV          | 2_of_3_IFNg_IL2_TNFa | 0.086               | 0.023               | 0.063               |
|     |       |        | CD8+   | 0   | CMV          | 2_of_3_IFNg_IL2_TNFa | 0.798               | 0.010               | 0.788               |
|     |       |        |        | 14  | CMV          | 2_of_3_IFNg_IL2_TNFa | 1.103               | 0.008               | 1.094               |
|     |       |        |        | 70  | CMV          | 2_of_3_IFNg_IL2_TNFa | 0.678               | 0.004               | 0.674               |
|     |       |        |        | 168 | CMV          | 2_of_3_IFNg_IL2_TNFa | 1.740               | 0.000               | 1.740               |
|     |       | 042054 | CD4+   | 0   | CMV          | 2_of_3_IFNg_IL2_TNFa | 0.113               | 0.031               | 0.082               |
|     |       |        |        | 14  | CMV          | 2_of_3_IFNg_IL2_TNFa | 0.191               | 0.114               | 0.077               |
|     |       |        |        | 168 | CMV          | 2_of_3_IFNg_IL2_TNFa | 0.121               | 0.043               | 0.078               |
|     |       |        | CD8+   | 0   | CMV          | 2_of_3_IFNg_IL2_TNFa | 1.772               | 0.003               | 1.768               |
|     |       |        |        | 14  | CMV          | 2_of_3_IFNg_IL2_TNFa | 1.395               | 0.006               | 1.389               |
|     |       |        |        | 70  | CMV          | 2_of_3_IFNg_IL2_TNFa | 1.437               | 0.006               | 1.431               |
|     |       |        |        | 168 | CMV          | 2_of_3_IFNg_IL2_TNFa | 1.129               | 0.000               | 1.129               |

**Unreliable samples are excluded.**

**Records are excluded if the number of T-cell subsets is < 1,000**

**These criteria are applied separately to CD4+ and CD8+ subsets.**

**HVTN 602 / AERAS A-042: A randomized, placebo-controlled, partially blinded phase 1b clinical trial to evaluate the safety and immunogenicity of BCG revaccination, H4:IC31, and H56:IC31 in healthy, HIV-1-uninfected adolescent participants**

**Lab PT Report**

**Data as of February 5, 2018**

**Table 4**

**Listing of Positive ICS Responses Using MIMOSA**

| Lab | Group | Pub ID | T cell | Day | Peptide Pool | Cytokine             | % Cytokine Response | % Response Neg Ctrl | % Response Bkgd Adj |
|-----|-------|--------|--------|-----|--------------|----------------------|---------------------|---------------------|---------------------|
|     |       | 042060 | CD4+   | 0   | CMV          | 2_of_3_IFNg_IL2_TNFa | 0.196               | 0.014               | 0.182               |
|     |       |        |        | 14  | CMV          | 2_of_3_IFNg_IL2_TNFa | 0.158               | 0.012               | 0.146               |
|     |       |        |        | 70  | CMV          | 2_of_3_IFNg_IL2_TNFa | 0.354               | 0.010               | 0.344               |
|     |       |        |        | 168 | CMV          | 2_of_3_IFNg_IL2_TNFa | 0.247               | 0.012               | 0.236               |
|     |       |        | CD8+   | 0   | CMV          | 2_of_3_IFNg_IL2_TNFa | 0.378               | 0.000               | 0.378               |
|     |       |        |        | 14  | CMV          | 2_of_3_IFNg_IL2_TNFa | 0.491               | 0.000               | 0.491               |
|     |       |        |        | 70  | CMV          | 2_of_3_IFNg_IL2_TNFa | 0.665               | 0.005               | 0.661               |
|     |       |        |        | 168 | CMV          | 2_of_3_IFNg_IL2_TNFa | 0.681               | 0.000               | 0.681               |
|     |       | 042064 | CD4+   | 0   | CMV          | 2_of_3_IFNg_IL2_TNFa | 0.527               | 0.028               | 0.499               |
|     |       |        |        | 70  | CMV          | 2_of_3_IFNg_IL2_TNFa | 0.503               | 0.066               | 0.436               |
|     |       |        |        | 168 | CMV          | 2_of_3_IFNg_IL2_TNFa | 0.968               | 0.083               | 0.884               |
|     |       |        | CD8+   | 0   | CMV          | 2_of_3_IFNg_IL2_TNFa | 2.014               | 0.000               | 2.014               |
|     |       |        |        | 70  | CMV          | 2_of_3_IFNg_IL2_TNFa | 2.125               | 0.000               | 2.125               |
|     |       |        |        | 168 | CMV          | 2_of_3_IFNg_IL2_TNFa | 3.156               | 0.007               | 3.149               |
|     |       | 042070 | CD4+   | 0   | CMV          | 2_of_3_IFNg_IL2_TNFa | 0.190               | 0.062               | 0.128               |
|     |       | 042072 | CD4+   | 0   | CMV          | 2_of_3_IFNg_IL2_TNFa | 0.029               | 0.005               | 0.024               |
|     |       |        |        | 70  | CMV          | 2_of_3_IFNg_IL2_TNFa | 0.038               | 0.006               | 0.032               |
|     |       |        |        | 168 | CMV          | 2_of_3_IFNg_IL2_TNFa | 0.048               | 0.014               | 0.034               |
|     |       |        | CD8+   | 0   | CMV          | 2_of_3_IFNg_IL2_TNFa | 1.076               | 0.003               | 1.073               |
|     |       |        |        | 14  | CMV          | 2_of_3_IFNg_IL2_TNFa | 1.311               | 0.006               | 1.305               |
|     |       |        |        | 70  | CMV          | 2_of_3_IFNg_IL2_TNFa | 1.220               | 0.003               | 1.217               |

**Unreliable samples are excluded.**

**Records are excluded if the number of T-cell subsets is < 1,000**

**These criteria are applied separately to CD4+ and CD8+ subsets.**

**HVTN 602 / AERAS A-042: A randomized, placebo-controlled, partially blinded phase 1b clinical trial to evaluate the safety and immunogenicity of BCG revaccination, H4:IC31, and H56:IC31 in healthy, HIV-1-uninfected adolescent participants**

**Lab PT Report**

**Data as of February 5, 2018**

**Table 4**

**Listing of Positive ICS Responses Using MIMOSA**

| <i>Lab</i> | <i>Group</i> | <i>Pub ID</i> | <i>T cell</i> | <i>Day</i> | <i>Peptide Pool</i> | <i>Cytokine</i>      | <i>% Cytokine Response</i> | <i>% Response Neg Ctrl</i> | <i>% Response Bkgd Adj</i> |
|------------|--------------|---------------|---------------|------------|---------------------|----------------------|----------------------------|----------------------------|----------------------------|
|            |              |               |               | 168        | CMV                 | 2_of_3_IFNg_IL2_TNFa | 1.097                      | 0.005                      | 1.093                      |
|            | 042075       |               | CD4+          | 0          | CMV                 | 2_of_3_IFNg_IL2_TNFa | 0.165                      | 0.037                      | 0.128                      |
|            |              |               |               | 14         | CMV                 | 2_of_3_IFNg_IL2_TNFa | 0.181                      | 0.019                      | 0.162                      |
|            |              |               |               | 70         | CMV                 | 2_of_3_IFNg_IL2_TNFa | 0.208                      | 0.027                      | 0.181                      |
|            |              |               |               | 168        | CMV                 | 2_of_3_IFNg_IL2_TNFa | 0.120                      | 0.011                      | 0.109                      |
|            |              |               | CD8+          | 0          | CMV                 | 2_of_3_IFNg_IL2_TNFa | 3.556                      | 0.007                      | 3.549                      |
|            |              |               |               | 14         | CMV                 | 2_of_3_IFNg_IL2_TNFa | 3.490                      | 0.000                      | 3.490                      |
|            |              |               |               | 70         | CMV                 | 2_of_3_IFNg_IL2_TNFa | 4.115                      | 0.004                      | 4.111                      |
|            |              |               |               | 168        | CMV                 | 2_of_3_IFNg_IL2_TNFa | 3.133                      | 0.002                      | 3.132                      |

**Unreliable samples are excluded.**

**Records are excluded if the number of T-cell subsets is < 1,000**

**These criteria are applied separately to CD4+ and CD8+ subsets.**

**HVTN 602 / AERAS A-042: A randomized, placebo-controlled, partially blinded phase 1b clinical trial to evaluate the safety and immunogenicity of BCG revaccination, H4:IC31, and H56:IC31 in healthy, HIV-1-uninfected adolescent participants**

**Lab PT Report**

**Data as of February 5, 2018**

**Table 5  
Comparison of Response Rates at Day 0 vs. Day 14 (BCG Day 28)**

| Cytokine             | Tcell   | Peptide     | Treatment Group | Sample Sizes |           | McNemar's Test p-values |          |
|----------------------|---------|-------------|-----------------|--------------|-----------|-------------------------|----------|
|                      |         |             |                 | Day 0        | Day 14/28 | Unadjusted              | Adjusted |
| 2_of_3_IFNg_IL2_TNFa | CD4+    | BCG-Pasteur | Placebo         | 11           | 10        | 1.0000                  | 1.0000   |
|                      |         |             | H4:IC31         | 23           | 22        | 0.1250                  | 1.0000   |
|                      |         |             | H56:IC31        | 22           | 22        | 0.6250                  | 1.0000   |
|                      |         |             | BCG             | 24           | 20        | 0.0703                  | 0.7031   |
|                      |         | Ag85B       | Placebo         | 11           | 11        | .                       | .        |
|                      |         |             | H4:IC31         | 24           | 21        | 0.2500                  | 1.0000   |
|                      |         |             | H56:IC31        | 22           | 23        | 0.2188                  | 1.0000   |
|                      |         |             | BCG             | 24           | 20        | .                       | .        |
|                      |         | ESAT-6      | Placebo         | 11           | 11        | .                       | .        |
|                      |         |             | H4:IC31         | 24           | 22        | .                       | .        |
|                      |         |             | H56:IC31        | 22           | 22        | 1.0000                  | 1.0000   |
|                      |         |             | BCG             | 24           | 20        | .                       | .        |
|                      | Rv2660c | Placebo     | 11              | 11           | .         | .                       |          |
|                      |         | H4:IC31     | 24              | 22           | .         | .                       |          |
|                      |         | H56:IC31    | 22              | 23           | .         | .                       |          |
|                      |         | BCG         | 24              | 20           | .         | .                       |          |
|                      | TB 10.4 | Placebo     | 11              | 11           | .         | .                       |          |
|                      |         | H4:IC31     | 22              | 22           | 1.0000    | 1.0000                  |          |
|                      |         | H56:IC31    | 20              | 23           | 0.2500    | 1.0000                  |          |
|                      |         | BCG         | 23              | 20           | 0.2500    | 1.0000                  |          |

**Missing: Not applicable; responses all positive or all negative.**

**There is no data for BCG at day 14. BCG responses are compared between day 0 and 28.**

**Positive responses are calculated using MIMOSA.**

**P-values are adjusted using the Holm method within groups of cell subset and cytokine.**

**HVTN 602 / AERAS A-042: A randomized, placebo-controlled, partially blinded phase 1b clinical trial to evaluate the safety and immunogenicity of BCG revaccination, H4:IC31, and H56:IC31 in healthy, HIV-1-uninfected adolescent participants**

**Lab PT Report**  
**Data as of February 5, 2018**

**Table 5**  
**Comparison of Response Rates at Day 0 vs. Day 14 (BCG Day 28)**

| Cytokine | Tcell       | Peptide  | Treatment Group | Sample Sizes |           | McNemar's Test p-values |          |
|----------|-------------|----------|-----------------|--------------|-----------|-------------------------|----------|
|          |             |          |                 | Day 0        | Day 14/28 | Unadjusted              | Adjusted |
| CD8+     | BCG-Pasteur | Placebo  |                 | 11           | 10        | 1.0000                  | 1.0000   |
|          |             |          | H4:IC31         | 23           | 22        | 1.0000                  | .        |
|          |             |          | H56:IC31        | 22           | 22        | 1.0000                  | 1.0000   |
|          |             |          | BCG             | 24           | 20        | 0.3750                  | 1.0000   |
|          | Ag85B       | Placebo  |                 | 11           | 11        | .                       | .        |
|          |             |          | H4:IC31         | 24           | 21        | .                       | .        |
|          |             |          | H56:IC31        | 22           | 23        | .                       | .        |
|          |             |          | BCG             | 24           | 20        | .                       | .        |
|          | ESAT-6      | Placebo  |                 | 11           | 11        | .                       | .        |
|          |             |          | H4:IC31         | 24           | 22        | .                       | .        |
|          |             |          | H56:IC31        | 22           | 22        | .                       | .        |
|          |             |          | BCG             | 24           | 20        | .                       | .        |
|          | Rv2660c     | Placebo  |                 | 11           | 11        | .                       | .        |
|          |             |          | H4:IC31         | 24           | 22        | .                       | .        |
|          |             |          | H56:IC31        | 22           | 23        | .                       | .        |
|          |             |          | BCG             | 24           | 20        | .                       | .        |
| TB 10.4  | Placebo     |          | 11              | 11           | .         | .                       |          |
|          |             | H4:IC31  | 22              | 22           | .         | .                       |          |
|          |             | H56:IC31 | 20              | 23           | .         | .                       |          |
|          |             | BCG      | 23              | 20           | .         | .                       |          |

**Missing: Not applicable; responses all positive or all negative.**  
**There is no data for BCG at day 14. BCG responses are compared between day 0 and 28.**  
**Positive responses are calculated using MIMOSA.**  
**P-values are adjusted using the Holm method within groups of cell subset and cytokine.**

**HVTN 602 / AERAS A-042: A randomized, placebo-controlled, partially blinded phase 1b clinical trial to evaluate the safety and immunogenicity of BCG revaccination, H4:IC31, and H56:IC31 in healthy, HIV-1-uninfected adolescent participants**

**Lab PT Report**

**Data as of February 5, 2018**

**Table 6  
Comparison of Response Magnitudes at Day 0 vs. Day 14 (BCG Day 28)**

| Cytokine             | Tcell   | Peptide     | Treatment Group | Sample Sizes<br>Day 0<br>or<br>14/28 | Wilcoxon Sign Rank<br>p-values |          |
|----------------------|---------|-------------|-----------------|--------------------------------------|--------------------------------|----------|
|                      |         |             |                 |                                      | Unadjusted                     | Adjusted |
| 2_of_3_IFNg_IL2_TNFa | CD4+    | BCG-Pasteur | Placebo         | 12                                   | 1.0000                         | 1.0000   |
|                      |         |             | H4:IC31         | 24                                   | 0.2253                         | 1.0000   |
|                      |         |             | H56:IC31        | 24                                   | 0.8176                         | 1.0000   |
|                      |         |             | BCG             | 24                                   | 0.0010                         | 0.0164   |
|                      |         | Ag85B       | Placebo         | 12                                   | 1.0000                         | 1.0000   |
|                      |         |             | H4:IC31         | 24                                   | 0.0002                         | 0.0031   |
|                      |         |             | H56:IC31        | 24                                   | 0.0008                         | 0.0151   |
|                      |         |             | BCG             | 24                                   | 0.1641                         | 1.0000   |
|                      |         | ESAT-6      | Placebo         | 12                                   | 0.1875                         | 1.0000   |
|                      |         |             | H4:IC31         | 24                                   | 0.5000                         | 1.0000   |
|                      |         |             | H56:IC31        | 24                                   | 0.0522                         | 0.8359   |
|                      |         |             | BCG             | 24                                   | 0.6875                         | 1.0000   |
|                      | Rv2660c | Placebo     | 12              | 0.2500                               | 1.0000                         |          |
|                      |         | H4:IC31     | 24              | 1.0000                               | 1.0000                         |          |
|                      |         | H56:IC31    | 24              | 0.9375                               | 1.0000                         |          |
|                      |         | BCG         | 24              | 1.0000                               | 1.0000                         |          |
|                      | TB 10.4 | Placebo     | 12              | 0.3125                               | 1.0000                         |          |
|                      |         | H4:IC31     | 24              | 0.1099                               | 1.0000                         |          |
|                      |         | H56:IC31    | 24              | 0.8926                               | 1.0000                         |          |

**Positive responses are calculated using MIMOSA.**

**There is no data for BCG at day 14. BCG responses are compared between day 0 and 28.**

**ICS response magnitudes are censored at 0.01%**

**P-values are adjusted using the Holm method within groups of cell subset and cytokine.**

**HVTN 602 / AERAS A-042: A randomized, placebo-controlled, partially blinded phase 1b clinical trial to evaluate the safety and immunogenicity of BCG revaccination, H4:IC31, and H56:IC31 in healthy, HIV-1-uninfected adolescent participants**

**Lab PT Report**

Data as of February 5, 2018

**Table 6**

**Comparison of Response Magnitudes at Day 0 vs. Day 14 (BCG Day 28)**

| Cytokine | Tcell   | Peptide     | Treatment Group | Sample Sizes<br>Day 0<br>or<br>14/28 | Wilcoxon Sign Rank<br>p-values |          |
|----------|---------|-------------|-----------------|--------------------------------------|--------------------------------|----------|
|          |         |             |                 |                                      | Unadjusted                     | Adjusted |
|          |         |             | BCG             | 24                                   | 0.0002                         | 0.0046   |
|          | CD8+    | BCG-Pasteur | Placebo         | 12                                   | 0.0781                         | 1.0000   |
|          |         |             | H4:IC31         | 24                                   | 0.9843                         | 1.0000   |
|          |         |             | H56:IC31        | 24                                   | 0.2413                         | 1.0000   |
|          |         |             | BCG             | 24                                   | 0.9217                         | 1.0000   |
|          | Ag85B   |             | Placebo         | 12                                   | 0.0781                         | 1.0000   |
|          |         |             | H4:IC31         | 24                                   | 0.9780                         | 1.0000   |
|          |         |             | H56:IC31        | 24                                   | 0.7615                         | 1.0000   |
|          |         |             | BCG             | 24                                   | 0.1602                         | 1.0000   |
|          | ESAT-6  |             | Placebo         | 12                                   | 0.6875                         | 1.0000   |
|          |         |             | H4:IC31         | 24                                   | 0.0977                         | 1.0000   |
|          |         |             | H56:IC31        | 24                                   | 0.3828                         | 1.0000   |
|          |         |             | BCG             | 24                                   | 0.0234                         | 0.4688   |
|          | Rv2660c |             | Placebo         | 12                                   | 0.8438                         | 1.0000   |
|          |         |             | H4:IC31         | 24                                   | 0.2324                         | 1.0000   |
|          |         |             | H56:IC31        | 24                                   | 0.7910                         | 1.0000   |
|          |         |             | BCG             | 24                                   | 0.0645                         | 1.0000   |
|          | TB 10.4 |             | Placebo         | 12                                   | 0.6250                         | 1.0000   |
|          |         |             | H4:IC31         | 24                                   | 0.9515                         | 1.0000   |

**Positive responses are calculated using MIMOSA.**

**There is no data for BCG at day 14. BCG responses are compared between day 0 and 28.**

**ICS response magnitudes are censored at 0.01%**

**P-values are adjusted using the Holm method within groups of cell subset and cytokine.**

**HVTN 602 / AERAS A-042: A randomized, placebo-controlled, partially blinded phase 1b clinical trial to evaluate the safety and immunogenicity of BCG revaccination, H4:IC31, and H56:IC31 in healthy, HIV-1-uninfected adolescent participants**

**Lab PT Report**  
**Data as of February 5, 2018**

**Table 6**  
**Comparison of Response Magnitudes at Day 0 vs. Day 14 (BCG Day 28)**

| Cytokine | Tcell | Peptide | Treatment Group | Sample               | Wilcoxon Sign Rank |          |        |
|----------|-------|---------|-----------------|----------------------|--------------------|----------|--------|
|          |       |         |                 | Sizes                | p-values           |          |        |
|          |       |         |                 | Day 0<br>or<br>14/28 | Unadjusted         | Adjusted |        |
|          |       |         |                 | H56:IC31             | 24                 | 0.4258   | 1.0000 |
|          |       |         |                 | BCG                  | 24                 | 1.0000   | 1.0000 |

**Positive responses are calculated using MIMOSA.**  
**There is no data for BCG at day 14. BCG responses are compared between day 0 and 28.**  
**ICS response magnitudes are censored at 0.01%**  
**P-values are adjusted using the Holm method within groups of cell subset and cytokine.**



**HVTN 602 / AERAS A-042: A randomized, placebo-controlled, partially blinded phase 1b clinical trial to evaluate the safety and immunogenicity of BCG revaccination, H4:IC31, and H56:IC31 in healthy, HIV-1-uninfected adolescent participants**

**Lab PT Report**

**Data as of February 5, 2018**

**Table 7  
Comparison of Response Rates at Day 0 vs. Day 70**

| Cytokine             | Tcell   | Peptide     | Treatment Group | Sample Sizes |        | McNemar's Test p-values |          |
|----------------------|---------|-------------|-----------------|--------------|--------|-------------------------|----------|
|                      |         |             |                 | Day 0        | Day 70 | Unadjusted              | Adjusted |
| 2_of_3_IFNg_IL2_TNFa | CD4+    | BCG-Pasteur | Placebo         | 11           | 11     | 1.0000                  | 1.0000   |
|                      |         |             | H4:IC31         | 23           | 20     | 1.0000                  | 1.0000   |
|                      |         |             | H56:IC31        | 22           | 20     | 0.6875                  | 1.0000   |
|                      |         |             | BCG             | 24           | 18     | 0.0156                  | 0.1250   |
|                      |         | Ag85B       | Placebo         | 11           | 11     | .                       | .        |
|                      |         |             | H4:IC31         | 24           | 20     | 0.0005                  | 0.0049   |
|                      |         |             | H56:IC31        | 22           | 20     | 0.0010                  | 0.0088   |
|                      |         |             | BCG             | 24           | 18     | .                       | .        |
|                      |         | ESAT-6      | Placebo         | 11           | 11     | .                       | .        |
|                      |         |             | H4:IC31         | 24           | 20     | .                       | .        |
|                      |         |             | H56:IC31        | 22           | 20     | 0.6250                  | 1.0000   |
|                      |         |             | BCG             | 24           | 18     | .                       | .        |
|                      | Rv2660c | Placebo     | 11              | 11           | .      | .                       |          |
|                      |         | H4:IC31     | 24              | 20           | .      | .                       |          |
|                      |         | H56:IC31    | 22              | 20           | .      | .                       |          |
|                      |         | BCG         | 24              | 18           | .      | .                       |          |
|                      | TB 10.4 | Placebo     | 11              | 11           | .      | .                       |          |
|                      |         | H4:IC31     | 22              | 19           | 0.0156 | 0.1250                  |          |
|                      |         | H56:IC31    | 20              | 18           | 0.5000 | 1.0000                  |          |
|                      |         | BCG         | 23              | 17           | 1.0000 | 1.0000                  |          |

**Missing: Not applicable; responses all positive or all negative.**

**Positive responses are calculated using MIMOSA.**

**P-values are adjusted using the Holm method within groups of cell subset and cytokine.**

**HVTN 602 / AERAS A-042: A randomized, placebo-controlled, partially blinded phase 1b clinical trial to evaluate the safety and immunogenicity of BCG revaccination, H4:IC31, and H56:IC31 in healthy, HIV-1-uninfected adolescent participants**

**Lab PT Report**

Data as of February 5, 2018

**Table 7  
Comparison of Response Rates at Day 0 vs. Day 70**

| Cytokine | Tcell   | Peptide     | Treatment Group | Sample Sizes |        | McNemar's Test p-values |          |
|----------|---------|-------------|-----------------|--------------|--------|-------------------------|----------|
|          |         |             |                 | Day 0        | Day 70 | Unadjusted              | Adjusted |
|          | CD8+    | BCG-Pasteur | Placebo         | 11           | 11     | .                       | .        |
|          |         |             | H4:IC31         | 23           | 20     | 1.0000                  | 1.0000   |
|          |         |             | H56:IC31        | 22           | 20     | 1.0000                  | 1.0000   |
|          |         |             | BCG             | 24           | 18     | 1.0000                  | 1.0000   |
|          | Ag85B   |             | Placebo         | 11           | 11     | .                       | .        |
|          |         |             | H4:IC31         | 24           | 20     | .                       | .        |
|          |         |             | H56:IC31        | 22           | 20     | .                       | .        |
|          |         |             | BCG             | 24           | 18     | .                       | .        |
|          | ESAT-6  |             | Placebo         | 11           | 11     | .                       | .        |
|          |         |             | H4:IC31         | 24           | 20     | .                       | .        |
|          |         |             | H56:IC31        | 22           | 20     | .                       | .        |
|          |         |             | BCG             | 24           | 18     | .                       | .        |
|          | Rv2660c |             | Placebo         | 11           | 11     | .                       | .        |
|          |         |             | H4:IC31         | 24           | 20     | .                       | .        |
|          |         |             | H56:IC31        | 22           | 20     | .                       | .        |
|          |         |             | BCG             | 24           | 18     | .                       | .        |
|          | TB 10.4 |             | Placebo         | 11           | 11     | .                       | .        |
|          |         |             | H4:IC31         | 22           | 19     | .                       | .        |
|          |         |             | H56:IC31        | 20           | 18     | .                       | .        |
|          |         |             | BCG             | 23           | 17     | .                       | .        |

**Missing: Not applicable; responses all positive or all negative.**

**Positive responses are calculated using MIMOSA.**

**P-values are adjusted using the Holm method within groups of cell subset and cytokine.**

**HVTN 602 / AERAS A-042: A randomized, placebo-controlled, partially blinded phase 1b clinical trial to evaluate the safety and immunogenicity of BCG revaccination, H4:IC31, and H56:IC31 in healthy, HIV-1-uninfected adolescent participants**

**Lab PT Report**

**Data as of February 5, 2018**

**Table 8  
Comparison of Response Magnitudes at Day 0 vs. Day 70**

| Cytokine             | Tcell   | Peptide     | Treatment Group | Sample Sizes<br>Day 0<br>or 70 | Wilcoxon Sign Rank<br>p-values |          |
|----------------------|---------|-------------|-----------------|--------------------------------|--------------------------------|----------|
|                      |         |             |                 |                                | Unadjusted                     | Adjusted |
| 2_of_3_IFNg_IL2_TNFa | CD4+    | BCG-Pasteur | Placebo         | 12                             | 0.8203                         | 1.0000   |
|                      |         |             | H4:IC31         | 23                             | 0.5509                         | 1.0000   |
|                      |         |             | H56:IC31        | 23                             | 0.6777                         | 1.0000   |
|                      |         |             | BCG             | 24                             | <.0001                         | 0.0008   |
|                      |         | Ag85B       | Placebo         | 12                             | 1.0000                         | 1.0000   |
|                      |         |             | H4:IC31         | 24                             | <.0001                         | 0.0001   |
|                      |         |             | H56:IC31        | 23                             | <.0001                         | <.0001   |
|                      |         |             | BCG             | 24                             | 0.1055                         | 1.0000   |
|                      |         | ESAT-6      | Placebo         | 12                             | 1.0000                         | 1.0000   |
|                      |         |             | H4:IC31         | 24                             | 0.0938                         | 1.0000   |
|                      |         |             | H56:IC31        | 23                             | 0.0013                         | 0.0197   |
|                      |         |             | BCG             | 24                             | 0.3125                         | 1.0000   |
|                      | Rv2660c | Placebo     | 12              | 1.0000                         | 1.0000                         |          |
|                      |         | H4:IC31     | 24              | 0.5000                         | 1.0000                         |          |
|                      |         | H56:IC31    | 23              | 0.1272                         | 1.0000                         |          |
|                      |         | BCG         | 24              | 0.6875                         | 1.0000                         |          |
|                      | TB 10.4 | Placebo     | 12              | 1.0000                         | 1.0000                         |          |
|                      |         | H4:IC31     | 23              | 0.0002                         | 0.0039                         |          |
|                      |         | H56:IC31    | 21              | 0.6772                         | 1.0000                         |          |
|                      |         | BCG         | 23              | 0.0001                         | 0.0021                         |          |

**Positive responses are calculated using MIMOSA.**

**ICS response magnitudes are censored at 0.01%**

**P-values are adjusted using the Holm method within groups of cell subset and cytokine.**

**HVTN 602 / AERAS A-042: A randomized, placebo-controlled, partially blinded phase 1b clinical trial to evaluate the safety and immunogenicity of BCG revaccination, H4:IC31, and H56:IC31 in healthy, HIV-1-uninfected adolescent participants**

**Lab PT Report**  
**Data as of February 5, 2018**

**Table 8**  
**Comparison of Response Magnitudes at Day 0 vs. Day 70**

| Cytokine | Tcell   | Peptide     | Treatment Group | Sample Sizes<br>Day 0<br>or 70 | Wilcoxon Sign Rank<br>p-values |          |
|----------|---------|-------------|-----------------|--------------------------------|--------------------------------|----------|
|          |         |             |                 |                                | Unadjusted                     | Adjusted |
|          | CD8+    | BCG-Pasteur | Placebo         | 12                             | 0.2500                         | 1.0000   |
|          |         |             | H4:IC31         | 23                             | 0.9843                         | 1.0000   |
|          |         |             | H56:IC31        | 23                             | 0.0987                         | 1.0000   |
|          |         |             | BCG             | 24                             | 0.6095                         | 1.0000   |
|          | Ag85B   |             | Placebo         | 12                             | 0.9375                         | 1.0000   |
|          |         |             | H4:IC31         | 24                             | 0.9032                         | 1.0000   |
|          |         |             | H56:IC31        | 23                             | 0.5469                         | 1.0000   |
|          |         |             | BCG             | 24                             | 0.6250                         | 1.0000   |
|          | ESAT-6  |             | Placebo         | 12                             | 0.2188                         | 1.0000   |
|          |         |             | H4:IC31         | 24                             | 0.9697                         | 1.0000   |
|          |         |             | H56:IC31        | 23                             | 0.9375                         | 1.0000   |
|          |         |             | BCG             | 24                             | 0.0273                         | 0.5469   |
|          | Rv2660c |             | Placebo         | 12                             | 0.2500                         | 1.0000   |
|          |         |             | H4:IC31         | 24                             | 0.2661                         | 1.0000   |
|          |         |             | H56:IC31        | 23                             | 0.8438                         | 1.0000   |
|          |         |             | BCG             | 24                             | 0.1934                         | 1.0000   |
|          | TB 10.4 |             | Placebo         | 12                             | 0.8438                         | 1.0000   |
|          |         |             | H4:IC31         | 23                             | 0.3203                         | 1.0000   |
|          |         |             | H56:IC31        | 21                             | 0.4375                         | 1.0000   |
|          |         |             | BCG             | 23                             | 0.7344                         | 1.0000   |

**Positive responses are calculated using MIMOSA.**  
**ICS response magnitudes are censored at 0.01%**  
**P-values are adjusted using the Holm method within groups of cell subset and cytokine.**

**HVTN 602 / AERAS A-042: A randomized, placebo-controlled, partially blinded phase 1b clinical trial to evaluate the safety and immunogenicity of BCG revaccination, H4:IC31, and H56:IC31 in healthy, HIV-1-uninfected adolescent participants**

**Lab PT Report**

**Data as of February 5, 2018**

**Table 9  
Comparison of Response Rates at Day 0 vs. Day 168**

| Cytokine             | Tcell   | Peptide     | Treatment Group | Sample Sizes |         | McNemar's Test p-values |          |
|----------------------|---------|-------------|-----------------|--------------|---------|-------------------------|----------|
|                      |         |             |                 | Day 0        | Day 168 | Unadjusted              | Adjusted |
| 2_of_3_IFNg_IL2_TNFa | CD4+    | BCG-Pasteur | Placebo         | 11           | 10      | 1.0000                  | 1.0000   |
|                      |         |             | H4:IC31         | 23           | 20      | 0.1250                  | 1.0000   |
|                      |         |             | H56:IC31        | 22           | 20      | 1.0000                  | 1.0000   |
|                      |         |             | BCG             | 24           | 18      | 0.5000                  | 1.0000   |
|                      |         | Ag85B       | Placebo         | 11           | 10      | .                       | .        |
|                      |         |             | H4:IC31         | 24           | 23      | <.0001                  | 0.0007   |
|                      |         |             | H56:IC31        | 22           | 21      | 0.0156                  | 0.1719   |
|                      |         |             | BCG             | 24           | 23      | 0.5000                  | 1.0000   |
|                      |         | ESAT-6      | Placebo         | 11           | 10      | .                       | .        |
|                      |         |             | H4:IC31         | 24           | 23      | 1.0000                  | 1.0000   |
|                      |         |             | H56:IC31        | 22           | 21      | 1.0000                  | 1.0000   |
|                      |         |             | BCG             | 24           | 23      | .                       | .        |
|                      | Rv2660c | Placebo     | 11              | 10           | .       | .                       |          |
|                      |         | H4:IC31     | 24              | 23           | .       | .                       |          |
|                      |         | H56:IC31    | 22              | 21           | .       | .                       |          |
|                      |         | BCG         | 24              | 23           | .       | .                       |          |
|                      | TB 10.4 | Placebo     | 11              | 10           | .       | .                       |          |
|                      |         | H4:IC31     | 22              | 23           | 0.0313  | 0.3125                  |          |
|                      |         | H56:IC31    | 20              | 21           | 0.1250  | 1.0000                  |          |
|                      |         | BCG         | 23              | 23           | 0.2500  | 1.0000                  |          |

**Missing: Not applicable; responses all positive or all negative.**

**Positive responses are calculated using MIMOSA.**

**P-values are adjusted using the Holm method within groups of cell subset and cytokine.**

**HVTN 602 / AERAS A-042: A randomized, placebo-controlled, partially blinded phase 1b clinical trial to evaluate the safety and immunogenicity of BCG revaccination, H4:IC31, and H56:IC31 in healthy, HIV-1-uninfected adolescent participants**

**Lab PT Report**  
**Data as of February 5, 2018**

**Table 9**  
**Comparison of Response Rates at Day 0 vs. Day 168**

| Cytokine | Tcell   | Peptide     | Treatment Group | Sample Sizes |         | McNemar's Test p-values |          |
|----------|---------|-------------|-----------------|--------------|---------|-------------------------|----------|
|          |         |             |                 | Day 0        | Day 168 | Unadjusted              | Adjusted |
|          | CD8+    | BCG-Pasteur | Placebo         | 11           | 10      | .                       | .        |
|          |         |             | H4:IC31         | 23           | 20      | 1.0000                  | 1.0000   |
|          |         |             | H56:IC31        | 22           | 20      | 1.0000                  | 1.0000   |
|          |         |             | BCG             | 24           | 18      | 0.1250                  | 0.3750   |
|          | Ag85B   |             | Placebo         | 11           | 10      | .                       | .        |
|          |         |             | H4:IC31         | 24           | 23      | .                       | .        |
|          |         |             | H56:IC31        | 22           | 21      | .                       | .        |
|          |         |             | BCG             | 24           | 23      | .                       | .        |
|          | ESAT-6  |             | Placebo         | 11           | 10      | .                       | .        |
|          |         |             | H4:IC31         | 24           | 23      | .                       | .        |
|          |         |             | H56:IC31        | 22           | 21      | .                       | .        |
|          |         |             | BCG             | 24           | 23      | .                       | .        |
|          | Rv2660c |             | Placebo         | 11           | 10      | .                       | .        |
|          |         |             | H4:IC31         | 24           | 23      | .                       | .        |
|          |         |             | H56:IC31        | 22           | 21      | .                       | .        |
|          |         |             | BCG             | 24           | 23      | .                       | .        |
| TB 10.4  |         | Placebo     | 11              | 10           | .       | .                       |          |
|          |         | H4:IC31     | 22              | 23           | .       | .                       |          |
|          |         | H56:IC31    | 20              | 21           | .       | .                       |          |
|          |         | BCG         | 23              | 23           | .       | .                       |          |

**Missing: Not applicable; responses all positive or all negative.**  
**Positive responses are calculated using MIMOSA.**  
**P-values are adjusted using the Holm method within groups of cell subset and cytokine.**

**HVTN 602 / AERAS A-042: A randomized, placebo-controlled, partially blinded phase 1b clinical trial to evaluate the safety and immunogenicity of BCG revaccination, H4:IC31, and H56:IC31 in healthy, HIV-1-uninfected adolescent participants**

**Lab PT Report**

**Data as of February 5, 2018**

**Table 10  
Comparison of Response Magnitudes at Day 0 vs. Day 168**

| Cytokine             | Tcell   | Peptide     | Treatment Group | Sample Sizes<br>Day 0<br>or 168 | Wilcoxon Sign Rank<br>p-values |          |
|----------------------|---------|-------------|-----------------|---------------------------------|--------------------------------|----------|
|                      |         |             |                 |                                 | Unadjusted                     | Adjusted |
| 2_of_3_IFNg_IL2_TNFa | CD4+    | BCG-Pasteur | Placebo         | 12                              | 0.3828                         | 1.0000   |
|                      |         |             | H4:IC31         | 24                              | 0.9323                         | 1.0000   |
|                      |         |             | H56:IC31        | 24                              | 0.8904                         | 1.0000   |
|                      |         |             | BCG             | 24                              | <.0001                         | 0.0008   |
|                      |         | Ag85B       | Placebo         | 12                              | 1.0000                         | 1.0000   |
|                      |         |             | H4:IC31         | 24                              | <.0001                         | <.0001   |
|                      |         |             | H56:IC31        | 24                              | <.0001                         | 0.0001   |
|                      |         |             | BCG             | 24                              | 0.7334                         | 1.0000   |
|                      |         | ESAT-6      | Placebo         | 12                              | 0.9375                         | 1.0000   |
|                      |         |             | H4:IC31         | 24                              | 0.1250                         | 1.0000   |
|                      |         |             | H56:IC31        | 24                              | 0.1514                         | 1.0000   |
|                      |         |             | BCG             | 24                              | 1.0000                         | 1.0000   |
|                      | Rv2660c | Placebo     | 12              | 0.2500                          | 1.0000                         |          |
|                      |         | H4:IC31     | 24              | 0.1641                          | 1.0000                         |          |
|                      |         | H56:IC31    | 24              | 1.0000                          | 1.0000                         |          |
|                      |         | BCG         | 24              | 0.3125                          | 1.0000                         |          |
|                      | TB 10.4 | Placebo     | 12              | 0.6250                          | 1.0000                         |          |
|                      |         | H4:IC31     | 24              | <.0001                          | 0.0004                         |          |
|                      |         | H56:IC31    | 24              | 0.1531                          | 1.0000                         |          |
|                      |         | BCG         | 24              | 0.0003                          | 0.0046                         |          |

**Positive responses are calculated using MIMOSA.**

**ICS response magnitudes are censored at 0.01%**

**P-values are adjusted using the Holm method within groups of cell subset and cytokine.**

**HVTN 602 / AERAS A-042: A randomized, placebo-controlled, partially blinded phase 1b clinical trial to evaluate the safety and immunogenicity of BCG revaccination, H4:IC31, and H56:IC31 in healthy, HIV-1-uninfected adolescent participants**

**Lab PT Report**  
**Data as of February 5, 2018**

**Table 10**  
**Comparison of Response Magnitudes at Day 0 vs. Day 168**

| Cytokine | Tcell       | Peptide  | Treatment Group | Sample Sizes<br>Day 0<br>or 168 | Wilcoxon Sign Rank<br>p-values |          |
|----------|-------------|----------|-----------------|---------------------------------|--------------------------------|----------|
|          |             |          |                 |                                 | Unadjusted                     | Adjusted |
| CD8+     | BCG-Pasteur | Placebo  | 12              | 0.1094                          | 1.0000                         |          |
|          |             |          | H4:IC31         | 24                              | 0.9265                         | 1.0000   |
|          |             |          | H56:IC31        | 24                              | 0.2247                         | 1.0000   |
|          |             |          | BCG             | 24                              | 0.2979                         | 1.0000   |
|          | Ag85B       | Placebo  | 12              | 0.8438                          | 1.0000                         |          |
|          |             |          | H4:IC31         | 24                              | 0.0574                         | 1.0000   |
|          |             |          | H56:IC31        | 24                              | 0.5771                         | 1.0000   |
|          |             |          | BCG             | 24                              | 0.6953                         | 1.0000   |
|          | ESAT-6      | Placebo  | 12              | 0.6875                          | 1.0000                         |          |
|          |             |          | H4:IC31         | 24                              | 0.3652                         | 1.0000   |
|          |             |          | H56:IC31        | 24                              | 0.0391                         | 0.7813   |
|          |             |          | BCG             | 24                              | 0.0840                         | 1.0000   |
|          | Rv2660c     | Placebo  | 12              | 0.8125                          | 1.0000                         |          |
|          |             |          | H4:IC31         | 24                              | 1.0000                         | 1.0000   |
|          |             |          | H56:IC31        | 24                              | 0.5469                         | 1.0000   |
|          |             |          | BCG             | 24                              | 0.3652                         | 1.0000   |
| TB 10.4  | Placebo     | 12       | 0.5625          | 1.0000                          |                                |          |
|          |             | H4:IC31  | 24              | 0.4631                          | 1.0000                         |          |
|          |             | H56:IC31 | 24              | 0.1484                          | 1.0000                         |          |
|          |             | BCG      | 24              | 1.0000                          | 1.0000                         |          |

**Positive responses are calculated using MIMOSA.**  
**ICS response magnitudes are censored at 0.01%**  
**P-values are adjusted using the Holm method within groups of cell subset and cytokine.**
