# Supplementary material for: A phase 1b randomized study of the safety and immunological responses to vaccination with H4:IC31, H56:IC31, and BCG revaccination in Mycobacterium tuberculosis-uninfected adolescents in Cape Town, South Africa
Source: PubMed Central journal article supplement — eClinicalMedicine. 2020 Mar 18;21:100313. doi: 10.1016/j.eclinm.2020.100313 (PMC7201034; doi:10.1016/j.eclinm.2020.100313), 2020-03-18
Supplement: mmc2.pdf [file mmc2.pdf]

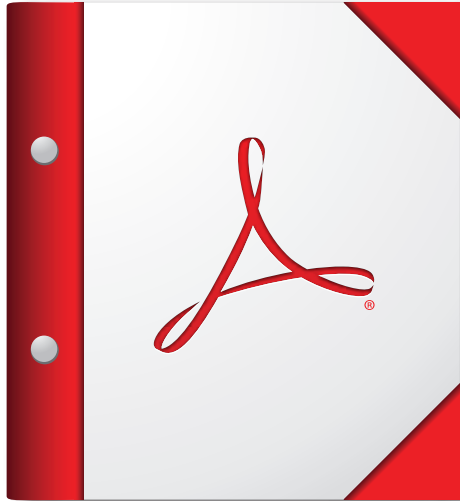

**For the best experience, open this PDF portfolio in  
Acrobat X or Adobe Reader X, or later.**

[Get Adobe Reader Now!](#)
